# Supplementary material for: Exploiting the trifluoroethyl group as a precatalyst ligand in nickel-catalyzed Suzuki-type alkylations
Source: Royal Society of Chemistry journal article supplement (doi:10.1039/c9sc00554d), 2019-01-01
Supplement: c9sc00554d1.pdf [file c9sc00554d1.pdf]

# Exploiting the Trifluoroethyl Group as a Precatalyst Ligand in Nickel-Catalyzed Suzuki- type Alkylations

Yi Yang,<sup>†\*</sup> Qinghai Zhou,<sup>‡</sup> Junjie Cai,<sup>†</sup> Teng Xue,<sup>§</sup> Yingle Liu,<sup>†</sup> Yan Jiang,<sup>†</sup> Yumei Su,<sup>†</sup> Lungwa Chung<sup>‡\*</sup> and David A. Vicic<sup>§\*</sup>

<sup>†</sup>Key Laboratory of Green Catalysis of Higher Education Institutes of Sichuan, Sichuan University of Science & Engineering, Zigong 643000, China; <sup>‡</sup>Shenzhen Grubbs Institute and Department of Chemistry, Southern University of Science and Technology, Shenzhen 518055, China; <sup>§</sup>Department of Chemistry, Lehigh University, 6 E. Packer Avenue, Bethlehem, PA 18015, USA

E-mail: yangyiyong@163.com; oscarchung@sustc.edu.cn; dav512@lehigh.edu

## Supporting Information

### Table of Contents

|                                                                                                                                                    |     |
|----------------------------------------------------------------------------------------------------------------------------------------------------|-----|
| I. General specifications .....                                                                                                                    | S2  |
| II. Synthesis of precatalyst [(bipy)Ni(CH <sub>2</sub> CF <sub>3</sub> ) <sub>2</sub> ] .....                                                      | S3  |
| III. Examination of the catalytic activities of [(bipy)Ni(CH <sub>2</sub> CF <sub>3</sub> ) <sub>2</sub> ] and reaction condition optimization ... | S4  |
| IV. Suzuki-type direct trifluoroethylation and alkylation of ArB(OH) <sub>2</sub> and characterization of Ar-R products .....                      | S6  |
| V. Copies of <sup>1</sup> H NMR, <sup>19</sup> F NMR and <sup>13</sup> C NMR spectra .....                                                         | S16 |
| VI. Control experiments for mechanistic studies .....                                                                                              | S66 |

## I. General specifications

All reagents were used as received from commercial sources, unless specified otherwise, or prepared as described in the literature. All manipulations were conducted using standard Schlenk and high-vacuum techniques or in a nitrogen-filled glovebox. Solvents were distilled from Na/benzophenone or  $\text{CaH}_2$ .  $^1\text{H}$  NMR and  $^{13}\text{C}$  NMR spectra were recorded on a 500 MHz or 600 MHz spectrometer (TMS as internal standard).  $^{19}\text{F}$  NMR was also recorded on a 400 MHz or 500 MHz spectrometer ( $\text{FCCl}_3$  as outside standard and low field is positive). Chemical shifts ( $\delta$ ) are reported in parts per million, and coupling constants ( $J$ ) are in hertz. High resolution mass spectrometry (EI/TOF or ESI-TOF) was performed at the Mass Spectrometry Facility.

Thin layer chromatography monitoring (TLC) was performed using precoated silica gel plate (0.2 mm thickness, GF254). Subsequent to elution, plates were first visualized using UV radiation (254 nm). Further visualization was conducted by staining with basic solution of potassium permanganate or acidic solution of ceric molybdate, followed by heating on a hot plate. Flash chromatography was performed using silica gel (200-300 mesh) with HPLC solvents. Columns were typically packed as slurry and equilibrated with petroleum ether prior to use.

## II. Synthesis of precatalyst [(bipy)Ni(CH<sub>2</sub>CF<sub>3</sub>)<sub>2</sub>]

A 100 mL round-bottom flask was charged with 2,2'-bipyridine (0.500 g, 3.20 mmol), Ni(COD)<sub>2</sub> (0.880 g, 3.20 mmol) and THF (40 mL). After stirring at room temperature for 12 h, a THF solution of CF<sub>3</sub>CH<sub>2</sub>I (0.740 g, 3.52 mmol in 10 mL of THF) were added to the flask. The reaction mixture was stirred overnight, and then the volatiles were removed under reduced pressure. The residue was redissolved in benzene (80 mL), and the suspension solution was passed through a sand-core glass funnel to remove the insoluble [(bipy)NiI<sub>2</sub>]. After the solvent of the filtrate were removed under reduced pressure, the residue solid was washed with pentane (5 mL × 2) and dried in *vacuo* to furnish [(bipy)Ni(CH<sub>2</sub>CF<sub>3</sub>)<sub>2</sub>] as a dark red powder (0.252 g, Yield 41%). Suitable single crystals for X-ray analysis were obtained by recrystallization from THF/pentane solution at -25 °C. <sup>1</sup>H NMR (500 MHz, THF-d<sub>8</sub>): δ 8.69 (d, *J* = 7.8 Hz, 2H), 8.23 (d, *J* = 7.8 Hz, 2H), 8.09 (dt, *J* = 7.8 Hz, 1.3 Hz, 2H), 7.59 (m, 2H), 1.06 (q, *J* = 16.2 Hz, 4H); <sup>19</sup>F NMR (470 MHz, CDCl<sub>3</sub>): δ -47.98 (t, *J* = 16.2 Hz, 6F); <sup>13</sup>C NMR (125 MHz, CDCl<sub>3</sub>): δ 156.22, 150.56, 139.39, 135.38 (q, *J* = 273.8 Hz), 127.16, 122.24, 6.11 (q, *J* = 23.6 Hz); Elemental analysis calcd (%) for C<sub>14</sub>H<sub>12</sub>F<sub>6</sub>N<sub>2</sub>Ni: C, 44.14; H, 3.18; found: C, 44.01; H, 3.27.

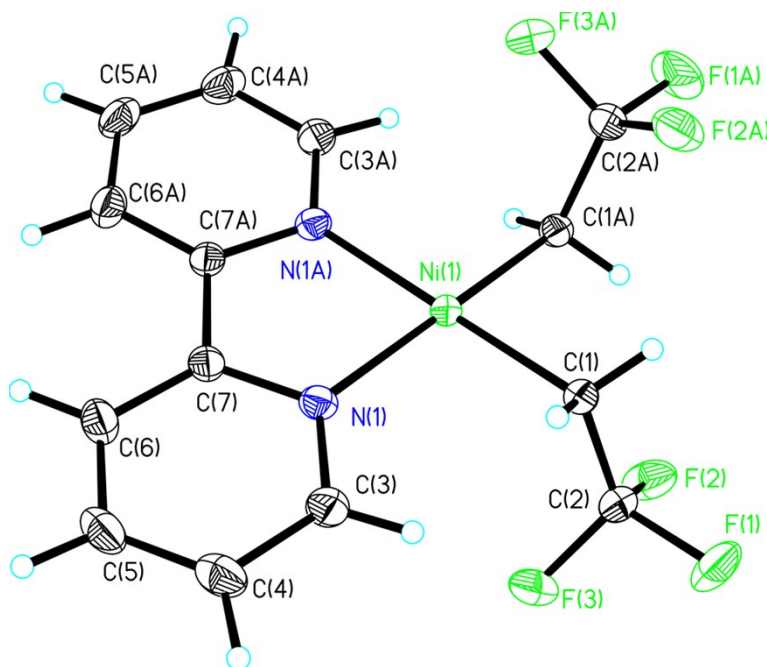

**Figure S1.** ORTEP diagram of [(bipy)Ni(CH<sub>2</sub>CF<sub>3</sub>)<sub>2</sub>] (**2**). (CCDC 1436475)

### III. Examination of the catalytic activities of [(bipy)Ni(CH<sub>2</sub>CF<sub>3</sub>)<sub>2</sub>] and reaction condition optimization

4-biphenylboronic acid **2a** (1.5 equiv), base (2.0 equiv), followed by a solution of CF<sub>3</sub>CH<sub>2</sub>I (1.0 equiv) in the indicated solvent (1.0 mL) were loaded into a 25 mL of Schlenk tube which was subject to evacuating/flushing with nitrogen gas three times. The precatalyst **2** (5.0 mol%) in the indicated solvent (0.5 mL) was added dropwise into the reaction system subsequently. The Schlenk tube was screw capped and put into a preheated oil bath (80 °C). After stirring for 12-24 h, the reaction mixture was cooled to room temperature and poured into a saturated aqueous ammonium chloride solution (10.0 mL). The aqueous phase was extracted with ether three times (10.0 mL×3) and the combined organic phase was dried over sodium sulfate. After removing the solvent in *vacuo*, the residue was purified by flash chromatography on silica gel or preparative TLC to afford the corresponding ArCH<sub>2</sub>CF<sub>3</sub> products.

**Table S1.** Solvent effect on the precatalyst **2** catalyzed Suzuki-type trifluoroethylation

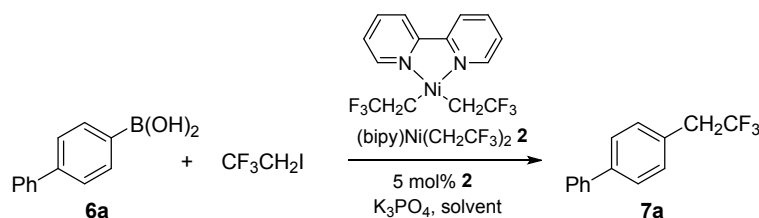

| Entry | Base                           | Solvent            | T/ °C | Isolated Yield |
|-------|--------------------------------|--------------------|-------|----------------|
| 1     | K <sub>3</sub> PO <sub>4</sub> | DME                | 80    | 93%            |
| 2     | K <sub>3</sub> PO <sub>4</sub> | DMSO               | 80    | 91%            |
| 3     | K <sub>3</sub> PO <sub>4</sub> | DMF                | 80    | 47%            |
| 4     | K <sub>3</sub> PO <sub>4</sub> | CH <sub>3</sub> CN | 80    | 35%            |
| 5     | K <sub>3</sub> PO <sub>4</sub> | toluene            | 80    | 43%            |
| 6     | K <sub>3</sub> PO <sub>4</sub> | THF                | 80    | 54%            |

7                      K<sub>3</sub>PO<sub>4</sub>                      dioxane                      80                      78%

**Table S2.** Base effect on the precatalyst **2** catalyzed Suzuki-type trifluoroethylation

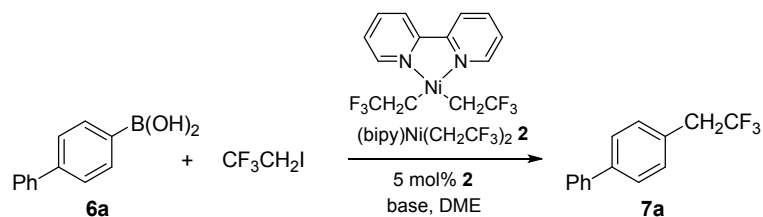

| Entry | Base                            | Solvent | T/ °C | Isolated Yield     |
|-------|---------------------------------|---------|-------|--------------------|
| 1     | K <sub>3</sub> PO <sub>4</sub>  | DME     | 80    | 93%                |
| 2     | Na <sub>2</sub> CO <sub>3</sub> | DME     | 80    | 7% <sup>a</sup>    |
| 3     | K <sub>2</sub> CO <sub>3</sub>  | DME     | 80    | 23% <sup>a</sup>   |
| 4     | Cs <sub>2</sub> CO <sub>3</sub> | DME     | 80    | 50% <sup>a</sup>   |
| 5     | tBuOK                           | DME     | 80    | Trace <sup>b</sup> |
| 6     | NaOAc                           | DME     | 80    | ND <sup>c</sup>    |

<sup>a</sup>Partial dehydrofluorination of coupling product. <sup>b</sup>Complete dehydrofluorination of coupling product. <sup>c</sup>No conversion of CF<sub>3</sub>CH<sub>2</sub>I.

**Table S3.** Temperature effect of Suzuki-type trifluoroethylation<sup>a</sup>

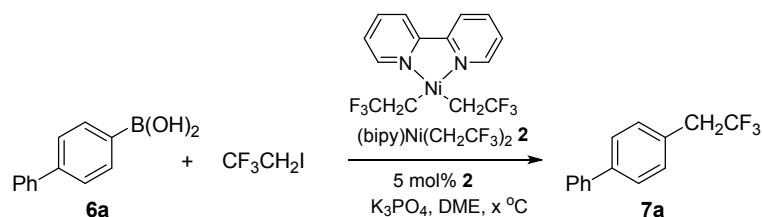

| Entry | Base                           | Solvent | T/ °C | Isolated Yield |
|-------|--------------------------------|---------|-------|----------------|
| 1     | K <sub>3</sub> PO <sub>4</sub> | DME     | 80    | 93%            |
| 2     | K <sub>3</sub> PO <sub>4</sub> | DME     | 50    | 77%            |
| 3     | K <sub>3</sub> PO <sub>4</sub> | DME     | RT    | <5%            |

<sup>a</sup>This experiment indicated the activation temperature of precatalyst [(bipy)Ni(CH<sub>2</sub>CF<sub>3</sub>)<sub>2</sub>] is approximately 50

°C which is lower than the commercialized (TMEDA)Ni(*o*-tol)(Cl) (the lower bound of activation is 60 °C) (J. D. Shields, E. E. Gray and A. G. Doyle, *Org. Lett.*, 2015, **17**, 2166).

## IV. Suzuki-type direct trifluoroethylation and alkylation of ArB(OH)<sub>2</sub> and characterization of Ar-R products

### (a) Typical Procedure

Arylboronic acid (1.5 equiv), base (2.0 equiv), followed by a solution of CF<sub>3</sub>CH<sub>2</sub>I (0.4 mmol, 1.0 equiv) or the corresponding R-X (0.4 mmol, 1.0 equiv) in the DME solvent (1.0 mL) were loaded into a 25 mL of Schlenck tube which was subject to evacuating/flushing with nitrogen gas three times. The precatalyst **2** (5.0 mol%) in the DME solvent (0.5 mL) was added dropwise into the reaction system subsequently. The Schlenck tube was screw capped and put into a preheated oil bath (80 °C). After stirring for 12-24 h, the reaction mixture was cooled to room temperature and poured into a saturated aqueous ammonium chloride solution (10.0 mL). The aqueous phase was extracted with ether three times (10.0 mL × 3) and the combined organic phase was dried over sodium sulfate. After removing the solvent in *vacuo*, the residue was purified by flash chromatography on silica gel or preparative TLC to afford the corresponding Ar-CH<sub>2</sub>CF<sub>3</sub> or Ar-R products.

### (b) Characterization of Ar-CH<sub>2</sub>CF<sub>3</sub> and Ar-R Products

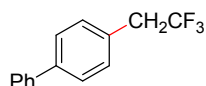

**(7a)**. Colorless oil, TLC R<sub>f</sub> (hexane) = 0.65, 91% yield (87 mg). A gram-scale synthesis was

implemented as the following procedure and the isolated yield can be comparatively effective (83%). <sup>1</sup>H NMR (600 MHz, CDCl<sub>3</sub>) δ 7.58 (d, *J* = 7.7 Hz, 4H), 7.44 (t, *J* = 7.6 Hz, 2H), 7.35 (t, *J* = 8.5 Hz, 3H), 3.40 (q, *J* = 10.8 Hz, 2H); <sup>19</sup>F NMR (470 MHz, CDCl<sub>3</sub>) δ -65.85 (t, *J* = 10.8 Hz, 3F); <sup>13</sup>C NMR (151 MHz, CDCl<sub>3</sub>) δ 141.12 (s), 140.53 (s), 130.60 (s), 129.14 (q, *J* = 2.9 Hz), 128.86 (s), 127.54 (s), 127.44 (s), 127.14 (s), 125.84 (q, *J* = 276.8 Hz), 39.92 (q, *J* = 29.8 Hz). MS (EI) *m/z* 236 (M<sup>+</sup>); HRMS (EI-TOF) *m/z* [M]<sup>+</sup> Calcd for C<sub>14</sub>H<sub>11</sub>F<sub>3</sub> 236.0813, found 236.0808.

**Gram-scale synthesis procedure:** 4-biphenylboronic acid (2.38 g, 12.0 mmol, 1.5 equiv), K<sub>3</sub>PO<sub>4</sub> (5.10 g, 24.0 mmol, 3.0 equiv), followed by a solution of CF<sub>3</sub>CH<sub>2</sub>I (0.80 mL, 8.0 mmol, 1.0 equiv) in the DME solvent (20.0 mL) were loaded into a 100 mL of Schlenck tube which was subject to evacuating/flushing with nitrogen gas three times. The precatalyst **2** (76.0 mg, 2.5 mol%) in the DME solvent (5.0 mL) was added dropwise into

the reaction system subsequently. The Schlenck tube was screw capped and put into a preheated oil bath (80 °C). After stirring for 24 h, the reaction mixture was cooled to room temperature and poured into a saturated aqueous ammonium chloride solution (100.0 mL). The aqueous phase was extracted with ether three times (70.0 mL  $\times$  3) and the combined organic phase was dried over sodium sulfate. After removing the solvent in *vacuo*, the residue was purified by flash chromatography on silica gel (eluent: petroleum ether) afford the corresponding 4-(2,2,2-trifluoroethyl)-1,1'-biphenyl **7a** (1.57 g, yield 83%).

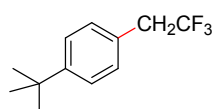

**(7b)**. Colorless oil, TLC  $R_f$ (hexane) = 0.60, 79% yield (68 mg).  $^1\text{H}$  NMR (500 MHz,  $\text{CDCl}_3$ ):  $\delta$  7.38 (d,  $J$  = 8.4 Hz, 2H), 7.23 (d,  $J$  = 8.1 Hz, 2H), 3.33 (q,  $J$  = 10.9 Hz, 2H), 1.33 (s, 9H);  $^{19}\text{F}$  NMR (470 MHz,  $\text{CDCl}_3$ ):  $\delta$  -65.97 (t,  $J$  = 10.9 Hz, 3F);  $^{13}\text{C}$  NMR (125 MHz,  $\text{CDCl}_3$ ):  $\delta$  151.27, 130.06, 127.35 (q,  $J$  = 2.7 Hz), 126.14 (q,  $J$  = 276.6 Hz), 125.83, 39.93 (q,  $J$  = 29.6 Hz), 34.75, 31.50. MS (EI)  $m/z$  216 ( $\text{M}^+$ ); HRMS (EI-TOF)  $m/z$  [ $\text{M}$ ] $^+$  Calcd for  $\text{C}_{12}\text{H}_{15}\text{F}_3$  216.1126, found 216.1120.

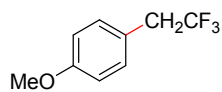

**(7c)**. Colorless oil, TLC  $R_f$ (hexane) = 0.55, 86% yield (65 mg).  $^1\text{H}$  NMR (500 MHz,  $\text{CDCl}_3$ ):  $\delta$  7.21 (d,  $J$  = 8.4 Hz, 2H), 6.90-6.87 (m, 2H), 3.80 (s, 3H), 3.29 (q,  $J$  = 10.8 Hz, 2H);  $^{19}\text{F}$  NMR (470 MHz,  $\text{CDCl}_3$ ):  $\delta$  -66.44 (t,  $J$  = 10.8 Hz, 3F);  $^{13}\text{C}$  NMR (125 MHz,  $\text{CDCl}_3$ ):  $\delta$  159.65, 131.46, 126.11 (q,  $J$  = 276.6 Hz), 122.35 (q,  $J$  = 2.8 Hz), 114.27, 55.42, 39.57 (q,  $J$  = 29.7 Hz); MS (EI)  $m/z$  190 ( $\text{M}^+$ ); HRMS (EI-TOF)  $m/z$  [ $\text{M}$ ] $^+$  Calcd for  $\text{C}_9\text{H}_9\text{F}_3\text{O}$  190.0605, found 190.0608.

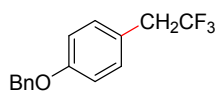

**(7d)**. White solid, TLC  $R_f$ (hexane) = 0.55, 83% yield (88 mg).  $^1\text{H}$  NMR (500 MHz,  $\text{CDCl}_3$ ):  $\delta$  7.45 (d,  $J$  = 7.0 Hz, 2H), 7.41 (t,  $J$  = 7.0 Hz, 2H), 7.37-7.33 (m, 1H), 7.23 (d,  $J$  = 8.5 Hz, 2H), 7.00-6.97 (m, 2H), 5.07 (s, 2H), 3.31 (q,  $J$  = 10.9 Hz, 2H);  $^{19}\text{F}$  NMR (470 MHz,  $\text{CDCl}_3$ ):  $\delta$  -66.31 (t,  $J$  = 10.9 Hz, 3F);  $^{13}\text{C}$  NMR (125 MHz,  $\text{CDCl}_3$ ):  $\delta$  158.87, 137.02, 131.49, 128.83, 128.24, 127.68, 126.08 (q,  $J$  = 276.7 Hz), 122.63 (q,  $J$  = 2.8 Hz), 115.19, 70.21, 39.57 (q,  $J$  = 29.7 Hz). MS (EI)  $m/z$  266 ( $\text{M}^+$ ); HRMS (EI-TOF)  $m/z$  [ $\text{M}$ ] $^+$  Calcd for  $\text{C}_{15}\text{H}_{13}\text{F}_3\text{O}$  266.0918, found 266.0921.

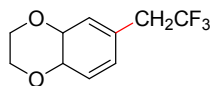

**(7e).** Light yellow oil, TLC  $R_f$  (hexane : EtOAc = 10 : 1) = 0.55, 80% yield (71 mg).  $^1\text{H}$  NMR (500 MHz,  $\text{CDCl}_3$ ):  $\delta$  6.83 (d,  $J$  = 8.3 Hz, 1H), 6.81 (d,  $J$  = 1.8 Hz, 1H), 6.75 (dd,  $J$  = 8.3 Hz, 1.8 Hz, 1H), 4.23 (s, 4H), 3.24 (q,  $J$  = 10.8 Hz, 2H);  $^{19}\text{F}$  NMR (470 MHz,  $\text{CDCl}_3$ ):  $\delta$  -66.26 (t,  $J$  = 10.8 Hz, 3F);  $^{13}\text{C}$  NMR (125 MHz,  $\text{CDCl}_3$ ):  $\delta$  143.71, 143.69, 126.02 (q,  $J$  = 276.7 Hz), 123.35, 121.60, 119.20, 117.60, 64.50, 64.48, 39.64 (q,  $J$  = 29.8 Hz). MS (EI)  $m/z$  220 ( $\text{M}^+$ ); HRMS (EI-TOF)  $m/z$  [ $\text{M}$ ] $^+$  Calcd for  $\text{C}_{10}\text{H}_{11}\text{F}_3\text{O}_2$  220.0711, found 220.0715.

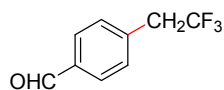

**(7f).** Light yellow oil, TLC  $R_f$  (hexane : EtOAc = 9 : 1) = 0.45, 70% yield (53 mg).  $^1\text{H}$  NMR (500 MHz,  $\text{CDCl}_3$ ):  $\delta$  10.01 (s, 1H), 7.86 (d,  $J$  = 8.3 Hz, 2H), 7.46 (d,  $J$  = 8.3 Hz, 2H), 3.44 (q,  $J$  = 10.6 Hz, 2H);  $^{19}\text{F}$  NMR (470 MHz,  $\text{CDCl}_3$ ):  $\delta$  -65.47 (t,  $J$  = 10.6 Hz, 3F);  $^{13}\text{C}$  NMR (125 MHz,  $\text{CDCl}_3$ ):  $\delta$  191.89, 136.92 (q,  $J$  = 2.8 Hz), 136.33, 131.10, 130.18, 125.52 (q,  $J$  = 277.0 Hz), 40.52 (q,  $J$  = 30.0 Hz). MS (EI)  $m/z$  188 ( $\text{M}^+$ ); HRMS (EI-TOF)  $m/z$  [ $\text{M}$ ] $^+$  Calcd for  $\text{C}_9\text{H}_7\text{F}_3\text{O}$  188.0449, found 188.0447.

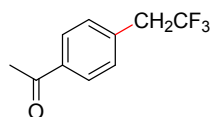

**(7g).** Colorless oil, TLC  $R_f$  (hexane : EtOAc = 5 : 1) = 0.48, 74% yield (60 mg).  $^1\text{H}$  NMR (500 MHz,  $\text{CDCl}_3$ ):  $\delta$  7.93 (dt,  $J$  = 8.3 Hz, 2.0 Hz, 2H), 7.38 (d,  $J$  = 8.1 Hz, 2H), 3.41 (q,  $J$  = 10.7 Hz, 2H), 2.58 (s, 3H);  $^{19}\text{F}$  NMR (470 MHz,  $\text{CDCl}_3$ ):  $\delta$  -65.57 (t,  $J$  = 10.6 Hz, 3F);  $^{13}\text{C}$  NMR (125 MHz,  $\text{CDCl}_3$ ):  $\delta$  197.74, 137.06, 135.45 (q,  $J$  = 2.7 Hz), 130.63, 128.84, 125.60 (q,  $J$  = 277.0 Hz), 40.33 (q,  $J$  = 30.0 Hz), 26.81. MS (EI)  $m/z$  202 ( $\text{M}^+$ ); HRMS (EI-TOF)  $m/z$  [ $\text{M}$ ] $^+$  Calcd for  $\text{C}_{10}\text{H}_9\text{F}_3\text{O}$  202.0605, found 202.0600.

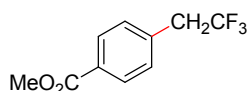

**(7h).** White solid, TLC  $R_f$  (hexane : EtOAc = 6 : 1) = 0.45, 80% yield (70 mg).  $^1\text{H}$  NMR (500 MHz,  $\text{CDCl}_3$ ):  $\delta$  8.01 (d,  $J$  = 8.3 Hz, 2H), 7.35 (d,  $J$  = 8.3 Hz, 2H), 3.90 (s, 3H), 3.40 (q,  $J$  = 10.7 Hz, 2H);  $^{19}\text{F}$  NMR (470 MHz,  $\text{CDCl}_3$ ):  $\delta$  -65.62 (t,  $J$  = 10.7 Hz, 3F);  $^{13}\text{C}$  NMR (125 MHz,  $\text{CDCl}_3$ ):  $\delta$  166.84, 135.28 (q,  $J$  = 2.6 Hz), 130.42, 130.24, 130.10, 125.62 (q,  $J$  = 276.9 Hz), 52.40, 40.35 (q,  $J$  = 30.0 Hz). MS (EI)  $m/z$  218 ( $\text{M}^+$ ); HRMS (EI-TOF)  $m/z$  [ $\text{M}$ ] $^+$  Calcd for  $\text{C}_{10}\text{H}_9\text{F}_3\text{O}_2$  218.0555, found 218.0552.

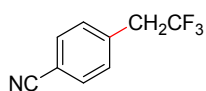

**(7i).** White solid, TLC  $R_f$  (hexane : EtOAc = 6 : 1) = 0.35, 72% yield (53 mg).  $^1\text{H}$  NMR (500 MHz,  $\text{CDCl}_3$ ):  $\delta$  7.64 (d,  $J$  = 8.1 Hz, 2H), 7.40 (d,  $J$  = 8.1 Hz, 2H), 3.42 (q,  $J$  = 10.5 Hz, 2H);  $^{19}\text{F}$  NMR (470 MHz,  $\text{CDCl}_3$ ):  $\delta$  -65.55 (t,  $J$  = 10.6 Hz, 3F);  $^{13}\text{C}$  NMR (125



MHz, CDCl<sub>3</sub>):  $\delta$  135.50 (q,  $J$  = 2.8 Hz), 132.65, 131.16, 125.33 (q,  $J$  = 277.0 Hz), 118.52, 112.56, 40.42 (q,  $J$  = 30.3 Hz). MS (EI)  $m/z$  185 ( $M^+$ ); HRMS (EI-TOF)  $m/z$  [ $M$ ]<sup>+</sup> Calcd for C<sub>9</sub>H<sub>6</sub>F<sub>3</sub>N 185.0452, found 185.0452.

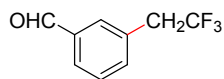

**(7j).** Yellow oil, TLC  $R_f$  (hexane : EtOAc = 9 : 1) = 0.45, 48% yield (36 mg). <sup>1</sup>H NMR (600 MHz, CDCl<sub>3</sub>)  $\delta$  10.03 (s, 1H), 7.87 (d,  $J$  = 7.3 Hz, 1H), 7.83 (s, 1H), 7.57 (dt,  $J$  = 14.9, 7.6 Hz, 2H), 3.47 (q,  $J$  = 10.6 Hz, 2H); <sup>19</sup>F NMR (470 MHz, CDCl<sub>3</sub>)  $\delta$  -65.84 (t,  $J$  = 10.8 Hz, 3F); <sup>13</sup>C NMR (151 MHz, CDCl<sub>3</sub>)  $\delta$  191.77 (s), 136.83 (s), 136.06 (s), 131.33 (q,  $J$  = 3.2 Hz), 131.13 (s), 129.49 (s), 128.19 (s), 125.44 (q,  $J$  = 276.8 Hz), 39.99 (q,  $J$  = 30.2 Hz). MS (EI)  $m/z$  188 ( $M^+$ ); HRMS (EI-TOF)  $m/z$  [ $M$ ]<sup>+</sup> Calcd for C<sub>9</sub>H<sub>7</sub>F<sub>3</sub>O 188.0449, found 188.0447.

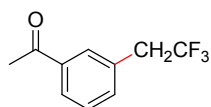

**(7k).** Yellow oil, TLC  $R_f$  (hexane : EtOAc = 5 : 1) = 0.50, 67% yield (54 mg). <sup>1</sup>H NMR (600 MHz, CDCl<sub>3</sub>)  $\delta$  7.94 (d,  $J$  = 7.6 Hz, 1H), 7.90 (s, 1H), 7.52 (d,  $J$  = 7.6 Hz, 1H), 7.48 (t,  $J$  = 7.6 Hz, 1H), 3.44 (q,  $J$  = 10.7 Hz, 2H), 2.62 (s, 3H); <sup>19</sup>F NMR (470 MHz, CDCl<sub>3</sub>)  $\delta$  -65.87 (t,  $J$  = 10.6 Hz, 3F); <sup>13</sup>C NMR (151 MHz, CDCl<sub>3</sub>)  $\delta$  197.62 (s), 137.57 (s), 134.70 (s), 130.79 (q,  $J$  = 2.9 Hz), 129.95 (s), 129.03 (s), 128.21 (s), 125.53 (q,  $J$  = 276.9 Hz), 40.10 (q,  $J$  = 29.9 Hz), 26.64 (s). MS (EI)  $m/z$  202 ( $M^+$ ); HRMS (EI-TOF)  $m/z$  [ $M$ ]<sup>+</sup> Calcd for C<sub>10</sub>H<sub>9</sub>F<sub>3</sub>O 202.0605, found 202.0600.

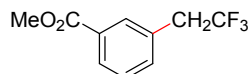

**(7l).** Colorless oil, TLC  $R_f$  (hexane : EtOAc = 6 : 1) = 0.45, 63% yield (55 mg). <sup>1</sup>H NMR (600 MHz, CDCl<sub>3</sub>)  $\delta$  8.03 (d,  $J$  = 7.7 Hz, 1H), 7.99 (s, 1H), 7.50 (d,  $J$  = 7.6 Hz, 1H), 7.45 (t,  $J$  = 7.7 Hz, 1H), 3.93 (s, 3H), 3.43 (q,  $J$  = 10.7 Hz, 2H); <sup>19</sup>F NMR (470 MHz, CDCl<sub>3</sub>)  $\delta$  -65.91 (t,  $J$  = 10.6 Hz, 3F); <sup>13</sup>C NMR (151 MHz, CDCl<sub>3</sub>)  $\delta$  166.62 (s), 134.57 (s), 131.33 (s), 130.72 (s), 130.54 (q,  $J$  = 2.9 Hz), 129.38 (s), 128.83 (s), 125.54 (q,  $J$  = 276.9 Hz), 52.26 (s), 40.04 (q,  $J$  = 30.0 Hz). MS (EI)  $m/z$  218 ( $M^+$ ); HRMS (EI-TOF)  $m/z$  [ $M$ ]<sup>+</sup> Calcd for C<sub>10</sub>H<sub>9</sub>F<sub>3</sub>O<sub>2</sub> 218.0555, found 218.0552.

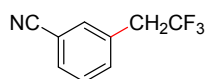

**(7m).** White solid, TLC  $R_f$  (hexane : EtOAc = 6 : 1) = 0.35, 44% yield (33 mg). <sup>1</sup>H NMR (600 MHz, CDCl<sub>3</sub>)  $\delta$  7.66 (d,  $J$  = 7.7 Hz, 1H), 7.61 (s, 1H), 7.56 (d,  $J$  = 7.8 Hz, 1H), 7.50 (t,  $J$  = 7.7 Hz, 1H), 3.42 (q,  $J$  = 10.5 Hz, 2H); <sup>19</sup>F NMR (470 MHz, CDCl<sub>3</sub>)  $\delta$  -65.83 (t,  $J$  = 10.8 Hz, 3F); <sup>13</sup>C NMR (151 MHz, CDCl<sub>3</sub>)  $\delta$  134.59 (s), 133.64 (s), 131.94 (s), 131.65 (q,  $J$  = 2.9 Hz), 129.64 (s), 125.16 (q,  $J$  = 277.0 Hz), 118.24 (s), 113.11 (s), 39.83 (q,  $J$  = 30.4 Hz). MS (EI)  $m/z$  185 ( $M^+$ ); HRMS (EI-TOF)  $m/z$  [ $M$ ]<sup>+</sup> Calcd for C<sub>9</sub>H<sub>6</sub>F<sub>3</sub>N 185.0452, found

185.0452.

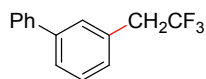

**(7n).** Colorless oil, TLC  $R_f$  (hexane) = 0.55, 74% yield (70 mg).  $^1\text{H}$  NMR (600 MHz,  $\text{CDCl}_3$ )

$\delta$  7.57 (t,  $J$  = 8.7 Hz, 3H), 7.51 (s, 1H), 7.47 – 7.40 (m, 3H), 7.36 (t,  $J$  = 7.4 Hz, 1H), 7.28 (d,  $J$  = 7.6 Hz, 1H), 3.43 (q,  $J$  = 10.8 Hz, 2H);  $^{19}\text{F}$  NMR (470 MHz,  $\text{CDCl}_3$ )  $\delta$  -65.77 (t,  $J$  = 10.6 Hz, 3F).  $^{13}\text{C}$  NMR (151 MHz,  $\text{CDCl}_3$ )  $\delta$  141.81 (s), 140.66 (s), 130.67 (q,  $J$  = 5.6 Hz), 129.12 (s), 129.07 (s), 129.01 (s), 128.86 (s), 128.86 (s), 127.58 (s), 127.23 (s), 127.23 (s), 126.98 (s), 125.82 (q,  $J$  = 276.9 Hz), 40.33 (q,  $J$  = 29.7 Hz). MS (EI)  $m/z$  236 ( $\text{M}^+$ ); HRMS (EI-TOF)  $m/z$  [ $\text{M}$ ] $^+$  Calcd for  $\text{C}_{14}\text{H}_{11}\text{F}_3$  236.0813, found 236.0808.

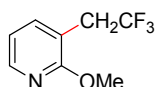

**(7o).** Colorless oil, TLC  $R_f$  (hexane: EtOAc = 5 : 1) = 0.40, 78% yield (60 mg).  $^1\text{H}$  NMR (500

MHz,  $\text{CDCl}_3$ ):  $\delta$  8.13 (dd,  $J$  = 5.0 Hz, 1.8 Hz, 1H), 7.52 (d,  $J$  = 7.3 Hz, 1H), 6.86 (dd,  $J$  = 7.3 Hz, 5.0 Hz, 1H), 3.95 (s, 3H), 3.40 (q,  $J$  = 10.8 Hz);  $^{19}\text{F}$  NMR (470 MHz,  $\text{CDCl}_3$ ):  $\delta$  -65.50 (t,  $J$  = 10.8 Hz, 3F);  $^{13}\text{C}$  NMR (125 MHz,  $\text{CDCl}_3$ ):  $\delta$  162.62, 147.01, 140.09, 126.02 (q,  $J$  = 277.3 Hz), 116.93, 113.48 (q,  $J$  = 2.8 Hz), 53.86, 33.62 (q,  $J$  = 30.6 Hz). MS (EI)  $m/z$  191 ( $\text{M}^+$ ); HRMS (EI-TOF)  $m/z$  [ $\text{M}$ ] $^+$  Calcd for  $\text{C}_8\text{H}_8\text{F}_3\text{NO}$  191.0558, found 191.0554.

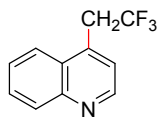

**(7p).** White solid, TLC  $R_f$  (hexane: EtOAc = 2 : 1) = 0.40, 82% yield (69 mg).  $^1\text{H}$  NMR (500 MHz,

$\text{CDCl}_3$ ):  $\delta$  9.24 (s, 1H), 8.49 (s, 1H), 8.00 (d,  $J$  = 8.2 Hz, 1H), 7.96 (d,  $J$  = 8.5 Hz, 1H), 7.78 (ddd,  $J$  = 8.4 Hz, 6.9 Hz, 1.2 Hz, 1H), 7.64 (t,  $J$  = 7.5 Hz, 1H), 3.79 (q,  $J$  = 10.4 Hz, 2H);  $^{19}\text{F}$  NMR (470 MHz,  $\text{CDCl}_3$ ):  $\delta$  -64.71 (t,  $J$  = 10.3 Hz, 3F);  $^{13}\text{C}$  NMR (125 MHz,  $\text{CDCl}_3$ ):  $\delta$  153.63, 145.63, 135.21, 131.25, 128.63, 127.63, 125.92 (q,  $J$  = 277.6 Hz), 122.93, 120.48, 34.60 (q,  $J$  = 30.9 Hz). MS (EI)  $m/z$  211 ( $\text{M}^+$ ); HRMS (EI-TOF)  $m/z$  [ $\text{M}$ ] $^+$  Calcd for  $\text{C}_{11}\text{H}_8\text{F}_3\text{N}$  211.0609, found 211.0601.

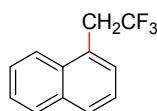

**(7q).** White solid, TLC  $R_f$  (hexane) = 0.55, 36% yield (30 mg).  $^1\text{H}$  NMR (500 MHz,  $\text{CDCl}_3$ ):  $\delta$

8.03 (d,  $J$  = 8.5 Hz, 1H), 7.90 (d,  $J$  = 7.9 Hz, 1H), 7.87 (dd,  $J$  = 7.4 Hz, 1.8 Hz, 1H), 7.59 (ddd,  $J$  = 8.5 Hz, 6.8 Hz, 1.4 Hz, 1H), 7.54 (ddd,  $J$  = 8.0 Hz, 6.9 Hz, 1.1 Hz, 1H), 7.50-7.46 (m, 2H), 3.87 (q,  $J$  = 10.6 Hz, 2H);  $^{19}\text{F}$  NMR (470 MHz,  $\text{CDCl}_3$ ):  $\delta$  -64.66 (t,  $J$  = 10.6 Hz, 3F);  $^{13}\text{C}$  NMR (125 MHz,  $\text{CDCl}_3$ ):  $\delta$  134.09, 132.54, 129.66, 129.28, 129.05, 126.82, 126.61 (q,  $J$  = 2.3 Hz), 126.33 (q,  $J$  = 276.3 Hz), 126.10, 125.46, 123.79, 36.94 (q,  $J$  = 30.0 Hz). MS (EI)  $m/z$  210 ( $\text{M}^+$ ); HRMS (EI-TOF)  $m/z$  [ $\text{M}$ ] $^+$  Calcd for  $\text{C}_{12}\text{H}_9\text{F}_3$  210.0656, found 210.0662.

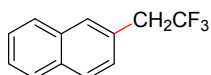

**(7r).** White solid, TLC  $R_f$  (hexane) = 0.57, 42% yield (35 mg).  $^1\text{H}$  NMR (500 MHz,  $\text{CDCl}_3$ ):

$\delta$  7.88-7.84 (m, 3H), 7.79 (s, 1H), 7.55-7.51 (m, 2H), 7.43 (d,  $J$  = 8.3 Hz, 1H), 3.54 (q,  $J$  = 10.8 Hz, 2H);  $^{19}\text{F}$  NMR (470 MHz,  $\text{CDCl}_3$ ):  $\delta$  -66.79 (t,  $J$  = 10.5 Hz, 3F);  $^{13}\text{C}$  NMR (125 MHz,  $\text{CDCl}_3$ ):  $\delta$  133.47, 133.08, 129.70, 128.59, 128.00, 127.90, 127.80, 126.61, 126.54, 126.13 (q,  $J$  = 277.0 Hz), 40.54 (q,  $J$  = 29.7 Hz). MS (EI)  $m/z$  210 ( $\text{M}^+$ ); HRMS (EI-TOF)  $m/z$  [ $\text{M}$ ] $^+$  Calcd for  $\text{C}_{12}\text{H}_9\text{F}_3$  210.0656, found 210.0662.

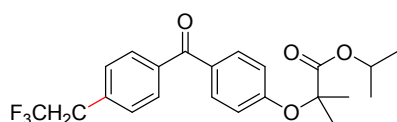

**(7s).** White solid, TLC  $R_f$  (hexane: EtOAc = 4 : 1) = 0.50, 61% yield (100

mg).  $^1\text{H}$  NMR (600 MHz,  $\text{CDCl}_3$ )  $\delta$  7.76 (dd,  $J$  = 10.8, 8.5 Hz, 4H), 7.41 (d,  $J$  = 8.0 Hz, 2H), 6.87 (d,  $J$  = 8.8 Hz, 2H), 5.09 (dt,  $J$  = 12.5, 6.3 Hz, 1H), 3.46 (q,  $J$  = 10.7 Hz, 2H), 1.66 (s, 6H), 1.21 (s, 3H), 1.20 (s, 3H);  $^{19}\text{F}$  NMR (470 MHz,  $\text{CDCl}_3$ )  $\delta$  -65.53 (t,  $J$  = 10.6 Hz, 3F);  $^{13}\text{C}$  NMR (151 MHz,  $\text{CDCl}_3$ )  $\delta$  194.92 (s), 173.14 (s), 159.72 (s), 137.97 (s), 134.07 (s), 132.05 (s), 130.35 (s), 130.05 (s), 126.41 (s), 124.58 (s), 117.22 (s), 79.42 (s), 69.35 (s), 40.19 (q,  $J$  = 30.0 Hz), 25.38 (s), 21.53 (s). MS (ESI)  $m/z$  409 ( $\text{M}+\text{H}^+$ ); HRMS (ESI-TOF)  $m/z$  [ $\text{M}+\text{H}$ ] $^+$  Calcd for  $\text{C}_{22}\text{H}_{24}\text{F}_3\text{O}_4$  409.1627, found 409.1633.

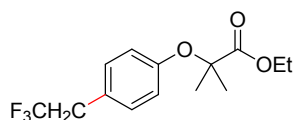

**(7t).** White solid, TLC  $R_f$  (hexane: EtOAc = 6 : 1) = 0.60, 44% yield (51 mg).  $^1\text{H}$

NMR (600 MHz,  $\text{CDCl}_3$ )  $\delta$  7.15 (d,  $J$  = 8.5 Hz, 2H), 6.81 (d,  $J$  = 8.6 Hz, 2H), 4.23 (q,  $J$  = 7.1 Hz, 2H), 3.29 (q,  $J$  = 10.9 Hz, 2H), 1.60 (s, 6H), 1.23 (t,  $J$  = 7.1 Hz, 3H);  $^{19}\text{F}$  NMR (470 MHz,  $\text{CDCl}_3$ )  $\delta$  -66.44 (t,  $J$  = 10.5 Hz, 3F);  $^{13}\text{C}$  NMR (151 MHz,  $\text{CDCl}_3$ )  $\delta$  174.38, 155.60, 131.16, 126.01 (q,  $J$  = 277.0 Hz), 123.75 (q,  $J$  = 6.2 Hz), 119.20, 79.38, 61.69, 39.64 (q,  $J$  = 29.9 Hz), 25.59, 14.24. MS (EI)  $m/z$  290 ( $\text{M}^+$ ); HRMS (EI-TOF)  $m/z$  [ $\text{M}$ ] $^+$  Calcd for  $\text{C}_{14}\text{H}_{17}\text{F}_3\text{O}_3$  290.1130, found 290.1137.

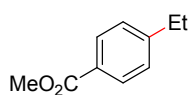

**(13a).** Colorless oil, TLC  $R_f$  (hexane: EtOAc = 6 : 1) = 0.60, 78% yield (51 mg).  $^1\text{H}$  NMR (600

MHz,  $\text{CDCl}_3$ )  $\delta$  7.96 (d,  $J$  = 8.2 Hz, 2H), 7.26 (d,  $J$  = 8.1 Hz, 2H), 3.90 (s, 3H), 2.70 (q,  $J$  = 7.6 Hz, 2H), 1.25 (t,  $J$  = 7.6 Hz, 3H);  $^{13}\text{C}$  NMR (151 MHz,  $\text{CDCl}_3$ )  $\delta$  167.22, 149.76, 129.71, 127.90, 127.65, 51.96, 28.96, 15.23.

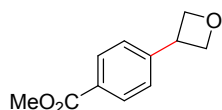

**(13b).** Colorless oil, TLC  $R_f$  (hexane: EtOAc = 6 : 1) = 0.55, 46% yield (35 mg).  $^1\text{H}$  NMR (600 MHz,  $\text{CDCl}_3$ )  $\delta$  8.05 (d,  $J$  = 8.3 Hz, 2H), 7.47 (d,  $J$  = 8.2 Hz, 2H), 5.11 (dd,  $J$  = 8.3, 6.1 Hz, 2H), 4.77 (t,  $J$  = 6.4 Hz, 2H), 4.32 – 4.22 (m, 1H), 3.92 (s, 3H);  $^{13}\text{C}$  NMR (151 MHz,  $\text{CDCl}_3$ )  $\delta$  166.85, 146.76, 130.12, 128.99, 126.83, 78.41, 52.13, 40.27. MS (EI)  $m/z$  192 ( $\text{M}^+$ ); HRMS (EI-TOF)  $m/z$  [ $\text{M}$ ] $^+$  Calcd for  $\text{C}_{11}\text{H}_{12}\text{O}_3$  192.0786, found 192.0777.

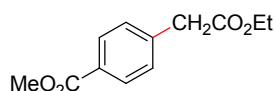

**(13c).** Colorless oil, TLC  $R_f$  (hexane: EtOAc = 6 : 1) = 0.55, 72% yield (64 mg).  $^1\text{H}$  NMR (600 MHz,  $\text{CDCl}_3$ )  $\delta$  8.00 (d,  $J$  = 8.3 Hz, 2H), 7.36 (d,  $J$  = 8.2 Hz, 2H), 4.16 (q,  $J$  = 7.1 Hz, 2H), 3.91 (s, 3H), 3.67 (s, 2H), 1.25 (t,  $J$  = 7.1 Hz, 3H).  $^{13}\text{C}$  NMR (151 MHz,  $\text{CDCl}_3$ )  $\delta$  170.86, 166.8, 139.29, 129.85, 129.35, 129.01, 61.10, 52.10, 41.38, 14.15. MS (EI)  $m/z$  222 ( $\text{M}^+$ ); HRMS (EI-TOF)  $m/z$  [ $\text{M}$ ] $^+$  Calcd for  $\text{C}_{12}\text{H}_{14}\text{O}_4$  222.0892, found 222.0891.

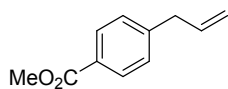

**(13d).** Colorless oil, TLC  $R_f$  (hexane: EtOAc = 6 : 1) = 0.65, 71% yield (50 mg).  $^1\text{H}$  NMR (600 MHz,  $\text{CDCl}_3$ )  $\delta$  7.97 (d,  $J$  = 8.2 Hz, 2H), 7.26 (d,  $J$  = 8.0 Hz, 2H), 5.95 (ddt,  $J$  = 16.9, 10.2, 6.7 Hz, 1H), 5.13 – 5.06 (m, 2H), 3.90 (s, 3H), 3.44 (d,  $J$  = 6.7 Hz, 2H).  $^{13}\text{C}$  NMR (151 MHz,  $\text{CDCl}_3$ )  $\delta$  167.12, 145.51, 136.41, 129.78, 128.63, 128.10, 116.60, 52.01, 40.16. MS (EI)  $m/z$  176 ( $\text{M}^+$ ); HRMS (EI-TOF)  $m/z$  [ $\text{M}$ ] $^+$  Calcd for  $\text{C}_{11}\text{H}_{12}\text{O}_2$  176.0837, found 176.0833.

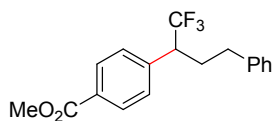

**(13e).** Light yellow solid, TLC  $R_f$  (hexane: EtOAc = 10 : 1) = 0.60, 75% yield (97 mg).  $^1\text{H}$  NMR (600 MHz,  $\text{CDCl}_3$ )  $\delta$  8.07 (d,  $J$  = 8.3 Hz, 2H), 7.37 (d,  $J$  = 8.2 Hz, 2H), 7.27 (d,  $J$  = 7.7 Hz, 2H), 7.21 (s, 1H), 7.06 (d,  $J$  = 7.4 Hz, 2H), 3.94 (s, 3H), 3.28 (m, 1H), 2.57 (m, 1H), 2.38 (m, 2H), 2.22 (m, 1H).  $^{19}\text{F}$  NMR (376 MHz,  $\text{CDCl}_3$ )  $\delta$  -69.40 (s, 3F);  $^{13}\text{C}$  NMR (151 MHz,  $\text{CDCl}_3$ )  $\delta$  166.68, 140.17, 139.54, 130.25, 130.03, 129.30, 128.60, 128.38, 126.89 (q,  $J$  = 191.8 Hz), 126.40, 52.25, 49.11 (q,  $J$  = 26.9 Hz), 32.38, 30.02. MS (EI)  $m/z$  322 ( $\text{M}^+$ ); HRMS (EI-TOF)  $m/z$  [ $\text{M}$ ] $^+$  Calcd for  $\text{C}_{18}\text{H}_{17}\text{F}_3\text{O}_2$  322.1181, found 322.1190.

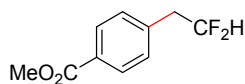

**(13f).** Light yellow oil, TLC  $R_f$  (hexane: EtOAc = 10 : 1) = 0.55, 41% yield (33 mg).  $^1\text{H}$

NMR (600 MHz, CDCl<sub>3</sub>)  $\delta$  8.02 (d,  $J$  = 8.2 Hz, 2H), 7.34 (d,  $J$  = 8.0 Hz, 2H), 5.95 (tt,  $J$  = 56.3, 4.5 Hz, 1H), 3.92 (s, 2H), 3.20 (td,  $J$  = 17.3, 4.4 Hz, 2H); <sup>13</sup>C NMR (151 MHz, CDCl<sub>3</sub>)  $\delta$  166.80 (s), 137.52 (s), 129.95 (s), 129.90 (s), 129.48 (s), 116.05 (t,  $J$  = 241.7 Hz), 52.18 (s), 40.82 (t,  $J$  = 22.2 Hz); <sup>19</sup>F NMR (376 MHz, CDCl<sub>3</sub>)  $\delta$  -114.86 (s, 2F).

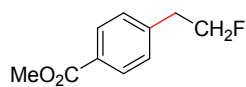

**(13g).** Light yellow oil, TLC  $R_f$  (hexane: EtOAc = 10 : 1) = 0.55, 58% yield (42 mg). <sup>1</sup>H NMR (400 MHz, CDCl<sub>3</sub>)  $\delta$  7.99 (d,  $J$  = 8.3 Hz, 2H), 7.31 (d,  $J$  = 8.1 Hz, 2H), 4.65 (dt,  $J$  = 47.0, 6.3 Hz, 2H), 3.91 (s, 3H), 3.07 (dt,  $J$  = 24.3, 6.3 Hz, 2H); <sup>13</sup>C NMR (101 MHz, CDCl<sub>3</sub>)  $\delta$  167.08 (s), 142.78 (s), 130.00 (s), 129.12 (s), 128.88 (s), 83.60 (d,  $J$  = 169.7 Hz), 52.16 (s), 37.04 (d,  $J$  = 20.6 Hz); <sup>19</sup>F NMR (377 MHz, CDCl<sub>3</sub>)  $\delta$  -216.10 (s, 1F).

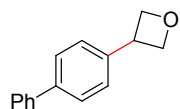

**(14b).** Colorless oil, TLC  $R_f$  (hexane: EtOAc = 20 : 1) = 0.60, 57% yield (48 mg). <sup>1</sup>H NMR (600 MHz, CDCl<sub>3</sub>)  $\delta$  7.59 (d,  $J$  = 7.0 Hz, 2H), 7.57 (d,  $J$  = 7.0 Hz, 2H), 7.50 – 7.41 (m, 4H), 7.35 (t,  $J$  = 7.4 Hz, 1H), 5.10 (dd,  $J$  = 8.4, 6.1 Hz, 2H), 4.81 (t,  $J$  = 6.4 Hz, 2H), 4.31 – 4.22 (m, 1H); <sup>13</sup>C NMR (151 MHz, CDCl<sub>3</sub>)  $\delta$  140.76, 140.61, 140.07, 128.83, 127.50, 127.34, 127.28, 127.06, 78.92, 40.09. MS (EI)  $m/z$  210 ( $M^+$ ); HRMS (EI-TOF)  $m/z$  [ $M$ ]<sup>+</sup> Calcd for C<sub>15</sub>H<sub>14</sub>O 210.1045, found 210.1054.

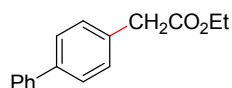

**(14c).** Colorless oil, TLC  $R_f$  (hexane: EtOAc = 10 : 1) = 0.50, 87% yield (84 mg). <sup>1</sup>H NMR (600 MHz, CDCl<sub>3</sub>)  $\delta$  7.56 (d,  $J$  = 7.7 Hz, 2H), 7.54 (d,  $J$  = 7.7 Hz, 2H), 7.42 (t,  $J$  = 7.7 Hz, 2H), 7.34 – 7.31 (m, 3H), 4.16 (q,  $J$  = 7.1 Hz, 2H), 3.64 (s, 2H), 1.26 (t,  $J$  = 7.1 Hz, 3H); <sup>13</sup>C NMR (151 MHz, CDCl<sub>3</sub>)  $\delta$  171.65, 140.85, 140.06, 133.22, 129.71, 128.79, 127.34, 127.29, 127.10, 60.97, 41.08, 14.24. MS (EI)  $m/z$  240 ( $M^+$ ); HRMS (EI-TOF)  $m/z$  [ $M$ ]<sup>+</sup> Calcd for C<sub>16</sub>H<sub>16</sub>O<sub>2</sub> 240.1150, found 240.1144.

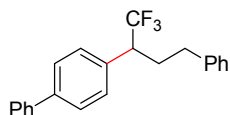

**(14e).** Light yellow solid, TLC  $R_f$  (hexane: EtOAc = 10 : 1) = 0.60, 90% yield (123 mg). <sup>1</sup>H NMR (600 MHz, CDCl<sub>3</sub>)  $\delta$  7.61 (d,  $J$  = 8.2 Hz, 4H), 7.50 – 7.42 (m, 2H), 7.39 – 7.35 (m, 3H), 7.29 (t,  $J$  = 7.5 Hz, 2H), 7.21 (t,  $J$  = 7.3 Hz, 1H), 7.11 (d,  $J$  = 7.3 Hz, 2H), 3.26 (m, 1H), 2.63 (m, 1H), 2.46 (m, 1H), 2.41 – 2.31 (m, 1H), 2.31 – 2.17 (m, 1H); <sup>19</sup>F NMR (376 MHz, CDCl<sub>3</sub>)  $\delta$  -69.18 (s, 3F); <sup>13</sup>C NMR (151 MHz, CDCl<sub>3</sub>)  $\delta$  141.36, 140.79, 140.69, 133.59, 129.80, 129.04, 128.74, 128.64,

127.71, 127.67, 127.32, 127.15 (q,  $J = 279.4$  Hz), 49.03 (q,  $J = 26.5$  Hz), 32.72, 30.34. MS (EI)  $m/z$  340 ( $M^+$ ); HRMS (EI-TOF)  $m/z$  [ $M$ ] $^+$  Calcd for  $C_{22}H_{19}F_3$  340.1439, found 340.1435.

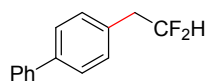

**(14f).** Light yellow solid, TLC  $R_f$  (hexane: EtOAc = 10 : 1) = 0.65, 75% yield (65 mg).  $^1H$  NMR (600 MHz,  $CDCl_3$ )  $\delta$  7.56 (t,  $J = 8.6$  Hz, 4H), 7.42 (t,  $J = 7.6$  Hz, 2H), 7.37 – 7.27 (m, 3H), 5.94 (tt,  $J = 56.6$ , 4.6 Hz, 1H), 3.16 (td,  $J = 17.3$ , 4.5 Hz, 2H);  $^{13}C$  NMR (101 MHz,  $CDCl_3$ )  $\delta$  140.80 (s), 140.64 (s), 131.58 (t,  $J = 5.9$  Hz), 130.34 (s), 128.94 (s), 127.56 (s), 127.53 (s), 127.21 (s), 116.75 (t,  $J = 241.5$  Hz), 40.69 (t,  $J = 21.9$  Hz);  $^{19}F$  NMR (377 MHz,  $CDCl_3$ )  $\delta$  -114.70 (s, 2F).

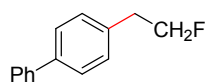

**(14g).** White solid, TLC  $R_f$  (hexane: EtOAc = 10 : 1) = 0.65, 78% yield (62 mg).  $^1H$  NMR (600 MHz,  $CDCl_3$ )  $\delta$  7.57 (d,  $J = 7.5$  Hz, 2H), 7.54 (d,  $J = 7.7$  Hz, 2H), 7.42 (t,  $J = 7.4$  Hz, 2H), 7.34 (d,  $J = 7.2$  Hz, 1H), 7.30 (d,  $J = 7.7$  Hz, 2H), 4.66 (dt,  $J = 47.1$ , 6.5 Hz, 2H), 3.05 (dt,  $J = 23.4$ , 6.4 Hz, 2H);  $^{13}C$  NMR (101 MHz,  $CDCl_3$ )  $\delta$  141.04 (s), 139.85 (s), 136.33 (d,  $J = 6.2$  Hz), 129.51 (s), 128.89 (s), 127.44 (s), 127.33 (s), 127.18 (s), 84.14 (d,  $J = 169.2$  Hz), 36.71 (d,  $J = 20.4$  Hz);  $^{19}F$  NMR (377 MHz,  $CDCl_3$ )  $\delta$  -215.25 (s, 1F).

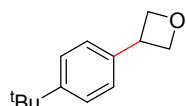

**(15b).** Colorless oil, TLC  $R_f$  (hexane: EtOAc = 20 : 1) = 0.60, 81% yield (62 mg).  $^1H$  NMR (600 MHz,  $CDCl_3$ )  $\delta$  7.40 (d,  $J = 7.9$  Hz, 2H), 7.34 (d,  $J = 8.0$  Hz, 2H), 5.08 – 5.01 (m, 2H), 4.79 (t,  $J = 6.4$  Hz, 2H), 4.21 (p,  $J = 7.7$  Hz, 1H), 1.33 (s, 9H);  $^{13}C$  NMR (151 MHz,  $CDCl_3$ )  $\delta$  150.03, 138.51, 126.58, 125.67, 79.08, 39.96, 34.52, 31.38. MS (EI)  $m/z$  190 ( $M^+$ ); HRMS (EI-TOF)  $m/z$  [ $M$ ] $^+$  Calcd for  $C_{13}H_{18}O$  190.1358, found 190.1366.

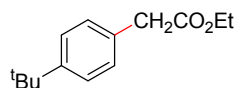

**(15c).** Colorless oil, TLC  $R_f$  (hexane: EtOAc = 10 : 1) = 0.55, 75% yield (66 mg).  $^1H$  NMR (600 MHz,  $CDCl_3$ )  $\delta$  7.34 (d,  $J = 8.3$  Hz, 2H), 7.22 (d,  $J = 8.3$  Hz, 2H), 4.15 (q,  $J = 7.1$  Hz, 2H), 3.58 (s, 2H), 1.31 (s, 9H), 1.26 (t,  $J = 7.1$  Hz, 3H);  $^{13}C$  NMR (151 MHz,  $CDCl_3$ )  $\delta$  171.85, 149.88, 131.12, 128.90, 125.51, 60.80, 40.90, 34.46, 31.36, 14.22. MS (EI)  $m/z$  220 ( $M^+$ ); HRMS (EI-TOF)  $m/z$  [ $M$ ] $^+$  Calcd for  $C_{14}H_{20}O_2$  220.1463, found 220.1460.

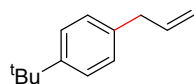

**(15d).** Colorless oil, TLC  $R_f$ (hexane) = 0.50, 69% yield (48 mg).  $^1\text{H}$  NMR (600 MHz,  $\text{CDCl}_3$ )

$\delta$  7.32 (d,  $J$  = 8.3 Hz, 2H), 7.13 (d,  $J$  = 8.3 Hz, 2H), 5.97 (ddt,  $J$  = 16.9, 10.0, 6.8 Hz, 1H), 5.07 (dddd,  $J$  = 10.0, 4.2, 3.2, 1.4 Hz, 2H), 3.36 (d,  $J$  = 6.8 Hz, 2H), 1.31 (s, 9H);  $^{13}\text{C}$  NMR (151 MHz,  $\text{CDCl}_3$ )  $\delta$  148.91, 137.64, 137.06, 128.21, 125.34, 115.64, 39.76, 34.40, 31.43. MS (EI)  $m/z$  174 ( $\text{M}^+$ ); HRMS (EI-TOF)  $m/z$  [ $\text{M}$ ] $^+$  Calcd for  $\text{C}_{13}\text{H}_{18}$  174.1409, found 174.1411.

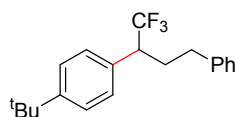

**(15e).** Light yellow oil, TLC  $R_f$ (hexane) = 0.50, 51% yield (65 mg).  $^1\text{H}$  NMR (600 MHz,  $\text{CDCl}_3$ )

$\delta$  7.39 (d,  $J$  = 8.3 Hz, 2H), 7.27 (dd,  $J$  = 14.7 Hz, 7.1 Hz, 2H), 7.22 (d,  $J$  = 13.6 Hz, 2H), 7.20 (t,  $J$  = 7.3 Hz, 1H), 7.10 (d,  $J$  = 7.3 Hz, 2H), 3.27–3.10 (m, 1H), 2.59 (m, 1H), 2.42 (m, 1H), 2.36–2.26 (m, 1H), 2.20 (m, 1H), 1.34 (s, 9H);  $^{19}\text{F}$  NMR (376 MHz,  $\text{CDCl}_3$ )  $\delta$  -69.70 (s, 3F);  $^{13}\text{C}$  NMR (151 MHz,  $\text{CDCl}_3$ )  $\delta$  151.30, 141.01, 131.48, 128.97, 128.69, 128.64, 126.38, 125.64, 127.52 (q,  $J$  = 280.1 Hz), 48.90 (q,  $J$  = 26.5 Hz), 34.76, 32.80, 31.54, 30.38. MS (EI)  $m/z$  320 ( $\text{M}^+$ ); HRMS (EI-TOF)  $m/z$  [ $\text{M}$ ] $^+$  Calcd for  $\text{C}_{20}\text{H}_{23}\text{F}_3$  320.1752, found 320.1760.

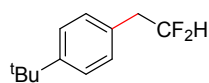

**(15f).** Light yellow oil, TLC  $R_f$ (hexane) = 0.50, 44% yield (35 mg).  $^1\text{H}$  NMR (600 MHz,  $\text{CDCl}_3$ )

$\delta$  7.40 (s, 2H), 7.22 (s, 2H), 5.95 (t,  $J$  = 56.6 Hz, 1H), 3.14 (t,  $J$  = 17.3 Hz, 2H), 1.35 (s, 9H);  $^{13}\text{C}$  NMR (151 MHz,  $\text{CDCl}_3$ )  $\delta$  150.62 (s), 129.67 (s), 125.84 (s), 117.02 (t,  $J$  = 241.3 Hz), 40.63 (t,  $J$  = 21.8 Hz), 34.70 (s), 31.53 (s);  $^{19}\text{F}$  NMR (376 MHz,  $\text{CDCl}_3$ )  $\delta$  -114.66 (dt,  $J$  = 56.7, 17.4 Hz, 2F).

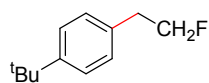

**(15g).** Colorless oil, TLC  $R_f$ (hexane) = 0.50, 56% yield (40 mg).  $^1\text{H}$  NMR (600 MHz,  $\text{CDCl}_3$ )

$\delta$  7.34 (d,  $J$  = 8.3 Hz, 2H), 7.17 (d,  $J$  = 8.2 Hz, 2H), 4.62 (dt,  $J$  = 47.1, 6.7 Hz, 2H), 2.99 (dt,  $J$  = 22.7, 6.7 Hz, 2H), 1.31 (s, 9H);  $^{13}\text{C}$  NMR (151 MHz,  $\text{CDCl}_3$ )  $\delta$  149.56 (s), 133.98 (d,  $J$  = 6.7 Hz), 128.66 (s), 125.49 (s), 84.20 (d,  $J$  = 168.7 Hz), 36.40 (d,  $J$  = 20.3 Hz), 34.44 (s), 31.38 (s);  $^{19}\text{F}$  NMR (376 MHz,  $\text{CDCl}_3$ )  $\delta$  -214.86 (s, 1F).

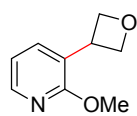

**(16b).** Yellow oil, TLC  $R_f$ (hexane: EtOAc = 4 : 1) = 0.40, 42% yield (28 mg).  $^1\text{H}$  NMR (600 MHz,  $\text{CDCl}_3$ )

$\delta$  8.07 (d,  $J$  = 5.0 Hz, 1H), 7.55 (d,  $J$  = 7.2 Hz, 1H), 6.92 (dd,  $J$  = 7.2, 5.1 Hz, 1H), 5.01 (dd,  $J$  = 8.5, 5.9 Hz, 2H), 4.81 (d,  $J$  = 13.3 Hz, 2H), 4.43 (p,  $J$  = 8.0 Hz, 1H), 3.93 (s, 3H);  $^{13}\text{C}$  NMR (151 MHz,  $\text{CDCl}_3$ )  $\delta$  161.56, 145.06, 134.94, 123.58, 116.76, 65.86, 53.36, 34.55.

MS (EI)  $m/z$  165 ( $M^+$ ); HRMS (EI-TOF)  $m/z$   $[M]^+$  Calcd for  $C_9H_{11}NO_2$  165.0790, found 165.0788.

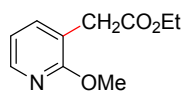

**(16c).** Colorless oil, TLC  $R_f$  (hexane: EtOAc = 4 : 1) = 0.40, 51% yield (40 mg).  $^1H$  NMR (600 MHz,  $CDCl_3$ )  $\delta$  8.09 (d,  $J$  = 4.9 Hz, 1H), 7.47 (d,  $J$  = 7.1 Hz, 1H), 6.89 – 6.81 (m, 1H), 4.17 (q,  $J$  = 7.1 Hz, 2H), 3.95 (s, 3H), 3.58 (s, 2H), 1.26 (t,  $J$  = 7.1 Hz, 3H);  $^{13}C$  NMR (151 MHz,  $CDCl_3$ )  $\delta$  171.09, 162.12, 145.69, 139.02, 117.53, 116.71, 60.85, 53.46, 35.56, 14.20. MS (EI)  $m/z$  195 ( $M^+$ ); HRMS (EI-TOF)  $m/z$   $[M]^+$  Calcd for  $C_{10}H_{13}NO_3$  195.0895, found 195.0899.

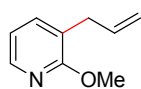

**(16d).** Colorless oil, TLC  $R_f$  (hexane: EtOAc = 4 : 1) = 0.50, 67% yield (40 mg).  $^1H$  NMR (600 MHz,  $CDCl_3$ )  $\delta$  8.03 (dd,  $J$  = 5.0, 1.7 Hz, 1H), 7.39 (d,  $J$  = 6.4 Hz, 1H), 6.83 (dd,  $J$  = 7.1, 5.0 Hz, 1H), 5.97 (ddt,  $J$  = 16.9, 10.4, 6.7 Hz, 1H), 5.10 – 5.05 (m, 2H), 3.96 (s, 3H), 3.33 (d,  $J$  = 6.6 Hz, 2H);  $^{13}C$  NMR (151 MHz,  $CDCl_3$ )  $\delta$  161.95, 144.48, 137.62, 135.67, 122.86, 116.73, 116.28, 53.32, 33.82. MS (EI)  $m/z$  149 ( $M^+$ ); HRMS (EI-TOF)  $m/z$   $[M]^+$  Calcd for  $C_9H_{11}NO$  149.0841, found 149.0839.

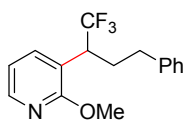

**(16e).** Colorless oil, TLC  $R_f$  (hexane: EtOAc = 5 : 1) = 0.40, 85% yield (100 mg).  $^1H$  NMR (600 MHz,  $CDCl_3$ )  $\delta$  8.16 (dd,  $J$  = 4.9, 1.8 Hz, 1H), 7.64 (d,  $J$  = 7.3 Hz, 1H), 7.29 – 7.25 (m, 2H), 7.19 (t,  $J$  = 7.4 Hz, 1H), 7.07 (d,  $J$  = 7.1 Hz, 2H), 6.94 (dd,  $J$  = 7.4, 5.0 Hz, 1H), 3.94 (s, 3H), 3.89 (m, 1H), 2.54 (m, 1H), 2.47 (m, 1H), 2.36 – 2.26 (m, 1H), 2.18 – 2.07 (m, 1H);  $^{19}F$  NMR (376 MHz,  $CDCl_3$ )  $\delta$  -69.54 (s, 3F);  $^{13}C$  NMR (151 MHz,  $CDCl_3$ )  $\delta$  162.64, 146.68, 128.63, 128.54, 127.14 (q,  $J$  = 280.9 Hz), 53.85, 40.54 (q,  $J$  = 26.8 Hz), 32.76, 30.39. MS (EI)  $m/z$  295 ( $M^+$ ); HRMS (EI-TOF)  $m/z$   $[M]^+$  Calcd for  $C_{16}H_{16}F_3NO$  295.1184, found 295.1180.

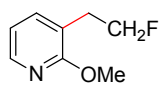

**(16g).** Yellow oil, TLC  $R_f$  (hexane: EtOAc = 5 : 1) = 0.45, 62% yield (39 mg).  $^1H$  NMR (600 MHz,  $CDCl_3$ )  $\delta$  8.07 (d,  $J$  = 6.4 Hz, 1H), 7.46 (d,  $J$  = 7.1 Hz, 1H), 6.84 (dd,  $J$  = 7.1, 5.1 Hz, 1H), 4.64 (dt,  $J$  = 47.1, 6.3 Hz, 2H), 3.96 (s, 3H), 2.98 (dt,  $J$  = 23.8, 6.3 Hz, 2H);  $^{13}C$  NMR (151 MHz,  $CDCl_3$ )  $\delta$  161.07 (s), 144.16 (s), 138.00 (s), 118.66 (d,  $J$  = 5.8 Hz), 115.75 (s), 81.27 (d,  $J$  = 167.4 Hz), 52.34 (s), 30.31 (d,  $J$  = 21.0 Hz);  $^{19}F$  NMR (377 MHz,  $CDCl_3$ )  $\delta$  -216.62 (s, 1F).



**Table S4.** The reference literatures of reported compounds

| Known Compound Number                                 | Reference                                                                                                                               |
|-------------------------------------------------------|-----------------------------------------------------------------------------------------------------------------------------------------|
| <b>7a, 7b, 7d, 7e, 7f, 7g, 7h, 7i, 7k, 7n, 7q, 7r</b> | Zhao, Y.; Hu, J. <i>Angew. Chem. Int. Ed.</i> <b>2012</b> , <i>51</i> , 1033.                                                           |
| <b>7c</b>                                             | Leng, F.; Wang, Y.; Li, H.; Li, J.; Zou, D.; Wu, Y.; Wu, Y. <i>Chem. Commun.</i> <b>2013</b> , <i>49</i> , 10697.                       |
| <b>7j, 7l</b>                                         | Xu, S.; Chen, H.-H.; Dai, J.-J.; Xu, H.-J. <i>Org. Lett.</i> <b>2014</b> , <i>16</i> , 2306.                                            |
| <b>7m</b>                                             | Kautzky, J. A.; Wang, T.; Evans, R. W.; MacMillan, D. W. C. <i>J. Am. Chem. Soc.</i> <b>2018</b> , <i>140</i> , 6522.                   |
| <b>7p</b>                                             | Akira, S.; Tetsuo, Y.; Hiroaki, I.; Masayuki, N.; Keiko, T.; Noriko, O. <i>Bull. Chem. Soc. Jpn.</i> <b>1986</b> , <i>59</i> , 3905.    |
| <b>13a</b>                                            | Rushworth, P. J.; Hulcoop, D. G.; Fox, D. J. <i>J. Org. Chem.</i> <b>2013</b> , <i>78</i> , 9517.                                       |
| <b>13b, 13c, 13d, 13f, 14f, 15f</b>                   | Zhang, X.; Yang, C. <i>Adv. Synth. Catal.</i> <b>2015</b> , <i>357</i> , 2721.                                                          |
| <b>14c</b>                                            | Xie, P.; Xie, Y.; Qian, B.; Zhou, H.; Xia, C.; Huang, H. <i>J. Am. Chem. Soc.</i> <b>2012</b> , <i>134</i> , 9902.                      |
| <b>15c</b>                                            | Chen, Z.; Wen, Y.; Fu, Y.; Chen, H.; Ye, M.; Luo, G. <i>Synlett</i> <b>2017</b> , <i>28</i> , 981.                                      |
| <b>15d</b>                                            | Mayer, M.; Czaplik, W. M.; Jacobi von Wangelin, A. <i>Adv. Synth. Catal.</i> <b>2010</b> , <i>352</i> , 2147.                           |
| <b>16d</b>                                            | Struk, Ł.; Sośnicki, J. G. <i>Synthesis</i> <b>2012</b> , <i>44</i> , 735-746.                                                          |
| <b>13g, 14g, 15g, 16g</b>                             | Yang, Y.; Cai, J.; Luo, G.; Jiang, Y.; Su, Y.; Su, Y.; Li, C.; Zheng, Y.; Zeng, J.; Liu, Y. <i>Org. Chem. Front.</i> <b>2019</b> , doi: |

**V. Copies of  $^1\text{H}$  NMR,  $^{19}\text{F}$  NMR and  $^{13}\text{C}$  NMR spectra**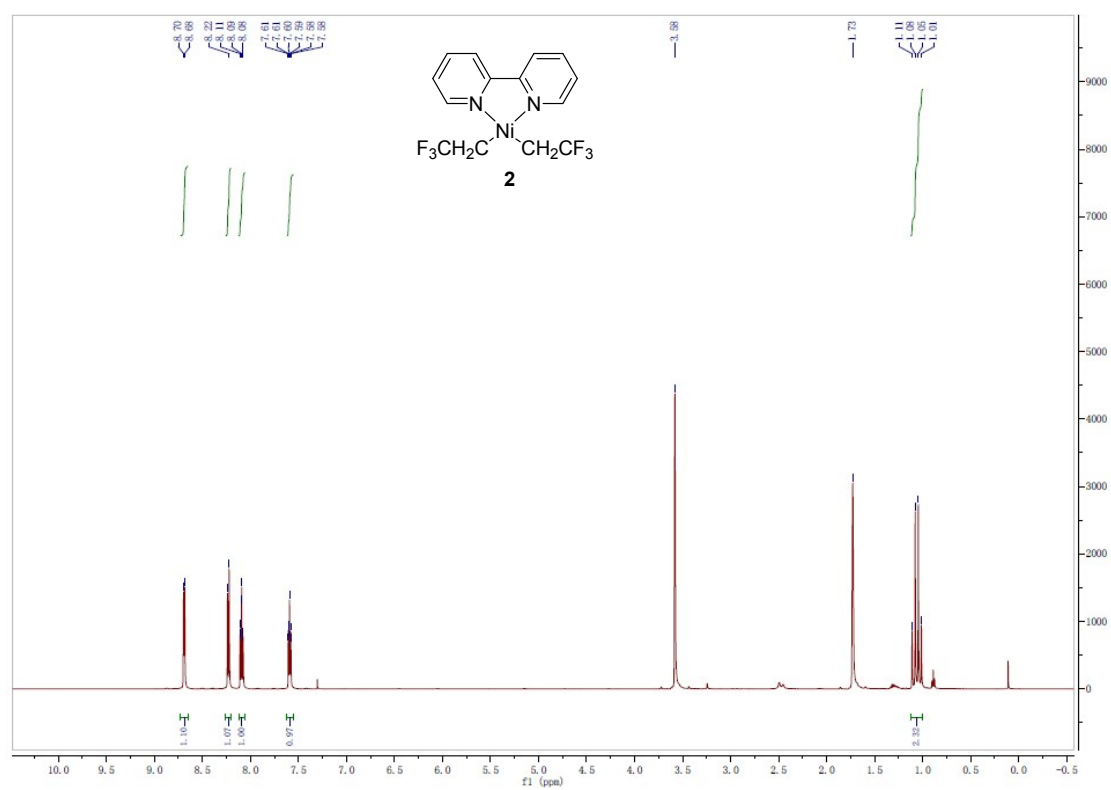**Figure S2.  $^1\text{H}$  NMR of **2** in  $d_8$ -THF**

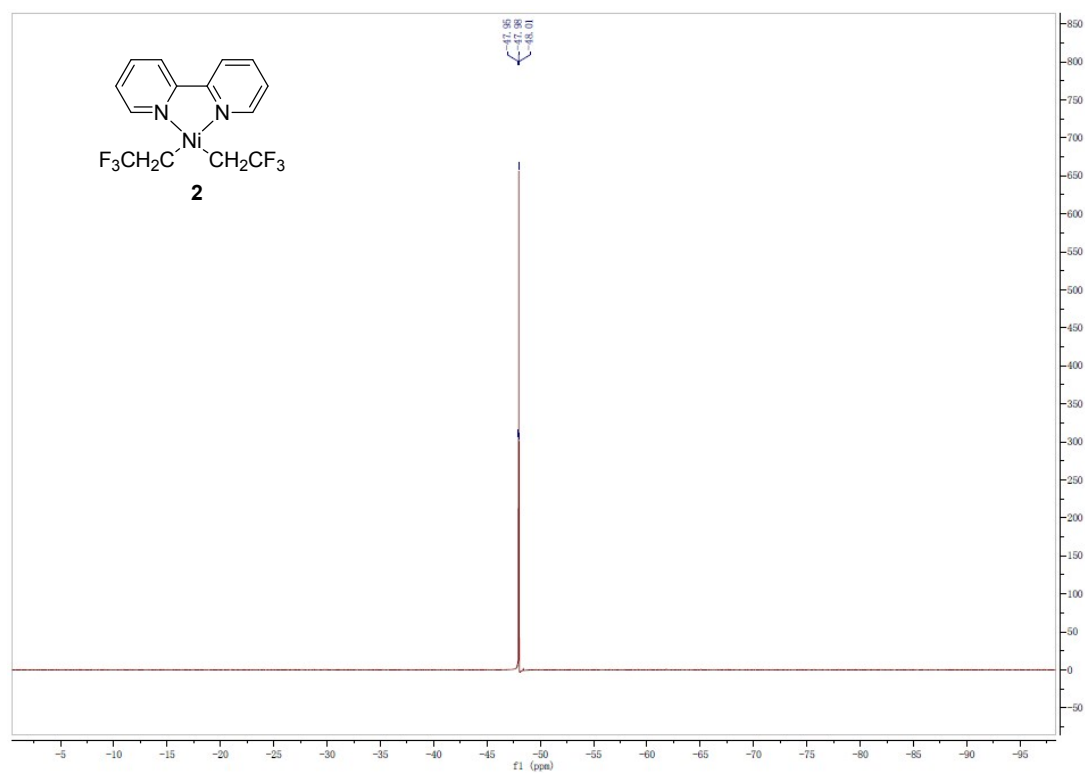

Figure S3. <sup>19</sup>F NMR of **2** in *d*<sub>8</sub>-THF

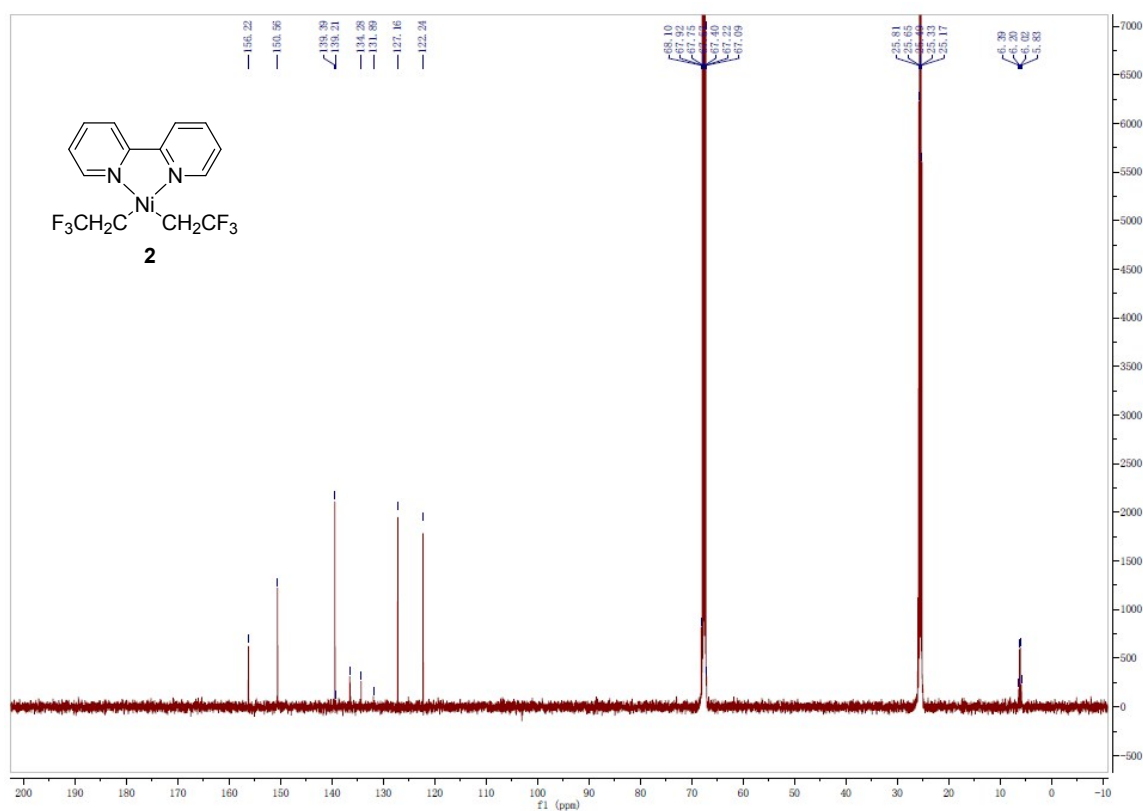

Figure S4. <sup>13</sup>C NMR of **2** in *d*<sub>8</sub>-THF

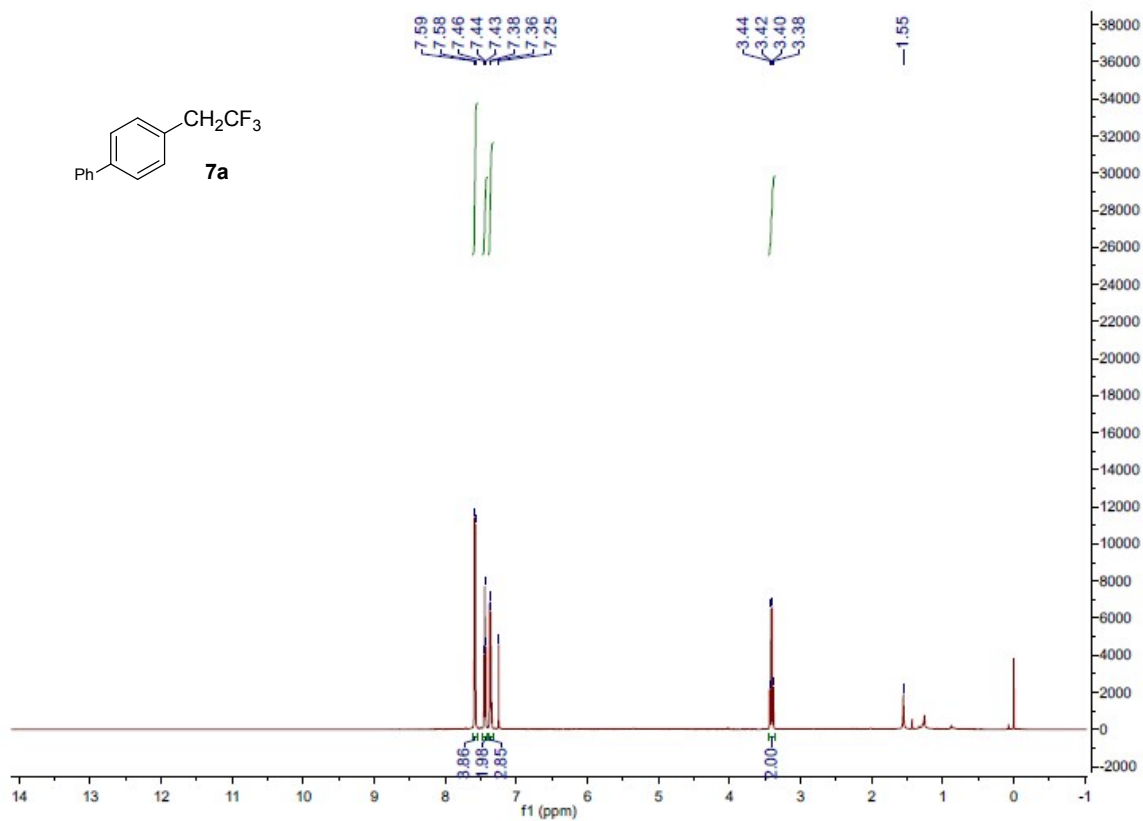

Figure S5. <sup>1</sup>H NMR of **7a** in CDCl<sub>3</sub>

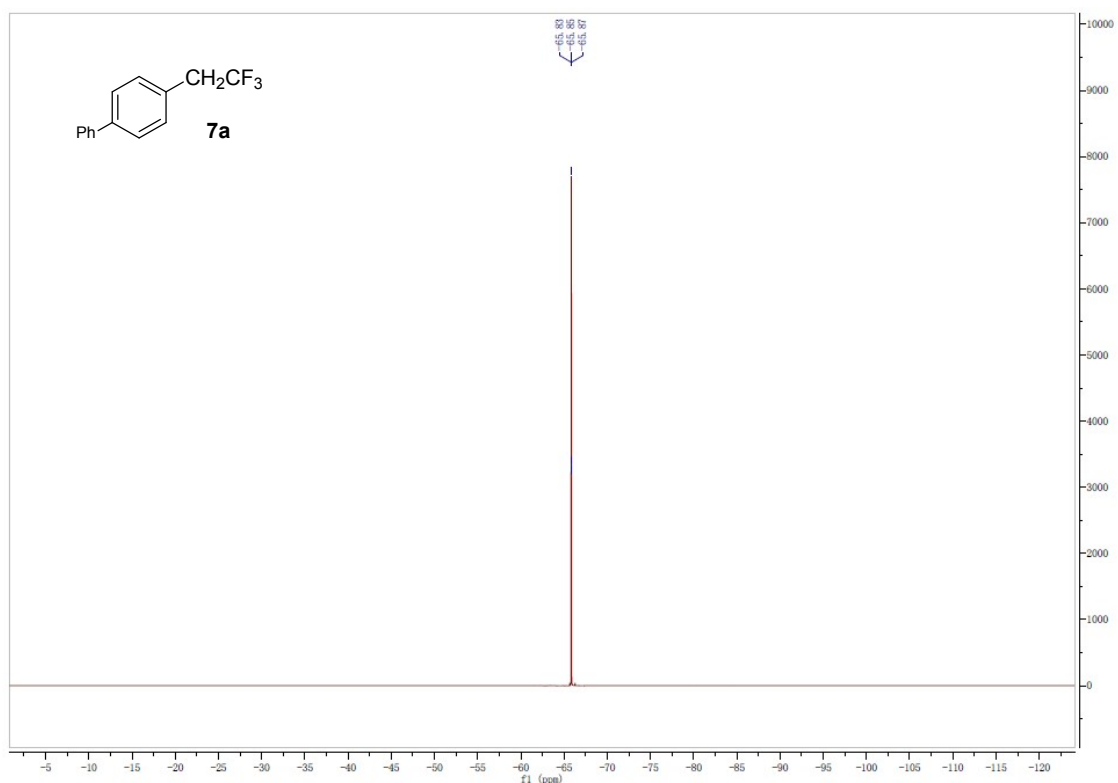

Figure S6. <sup>19</sup>F NMR of **7a** in CDCl<sub>3</sub>

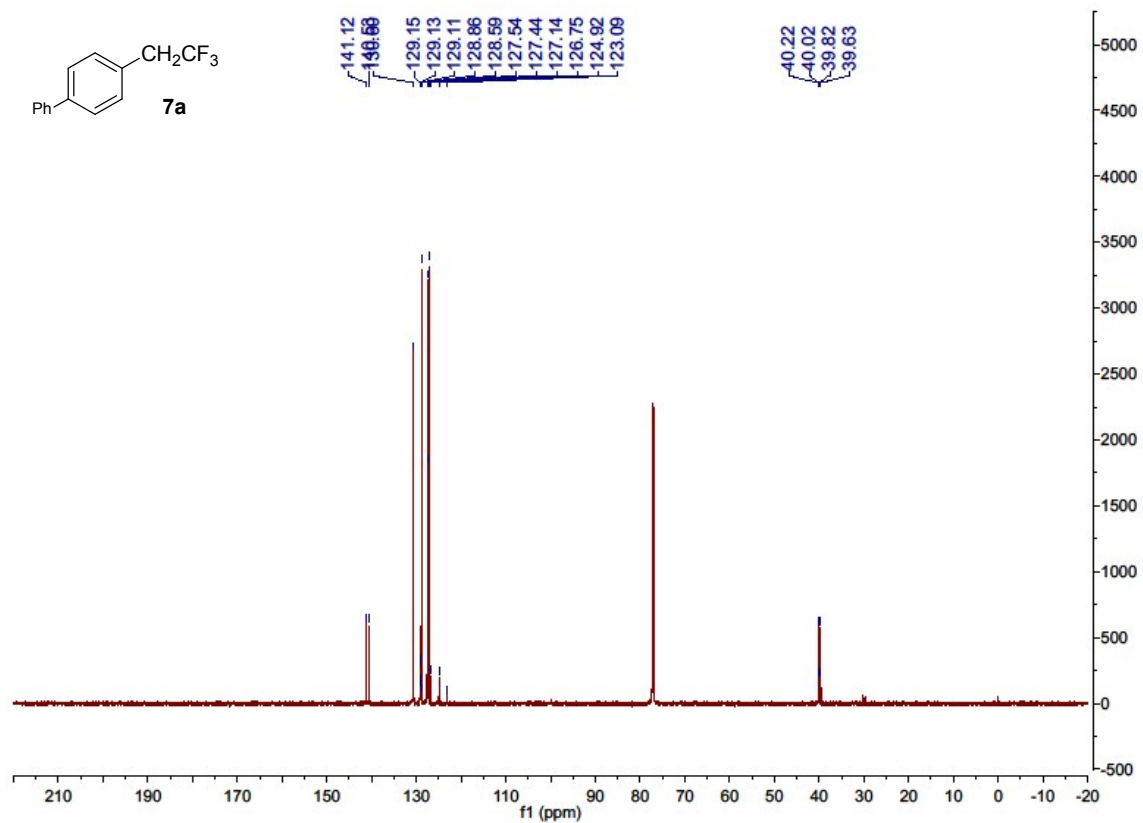

Figure S7. <sup>13</sup>C NMR of **7a** in CDCl<sub>3</sub>

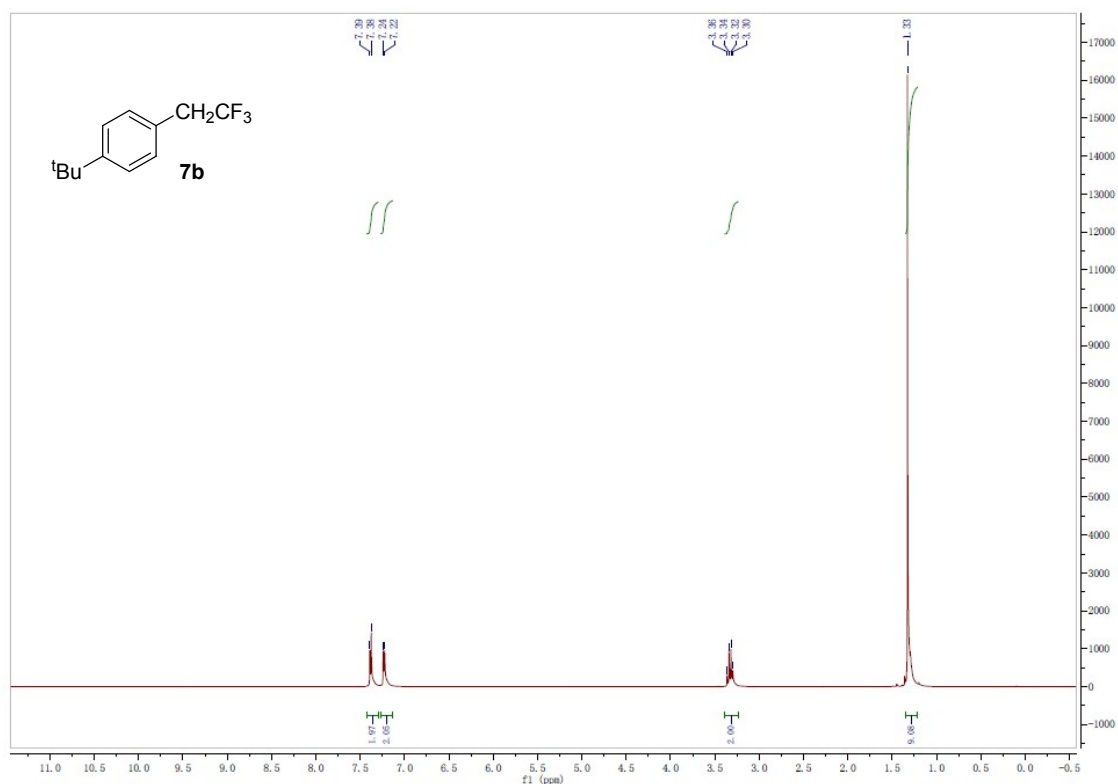

Figure S8. <sup>1</sup>H NMR of **7b** in CDCl<sub>3</sub>

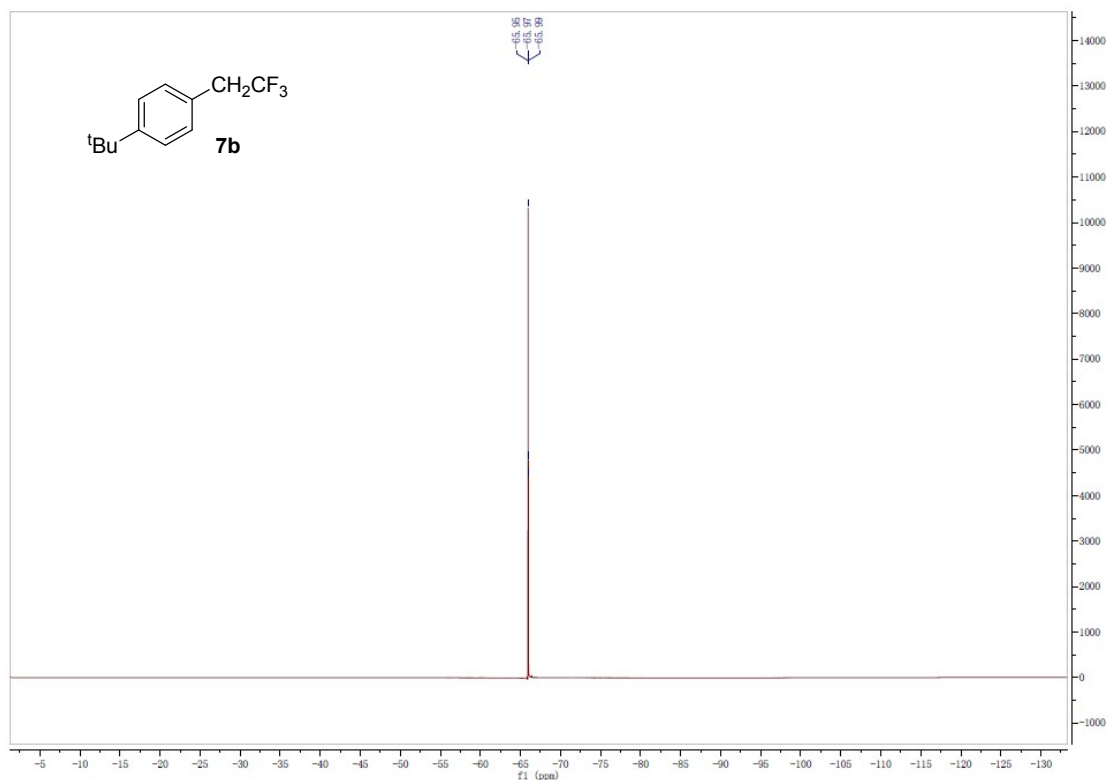

Figure S9. <sup>19</sup>F NMR of **7b** in CDCl<sub>3</sub>

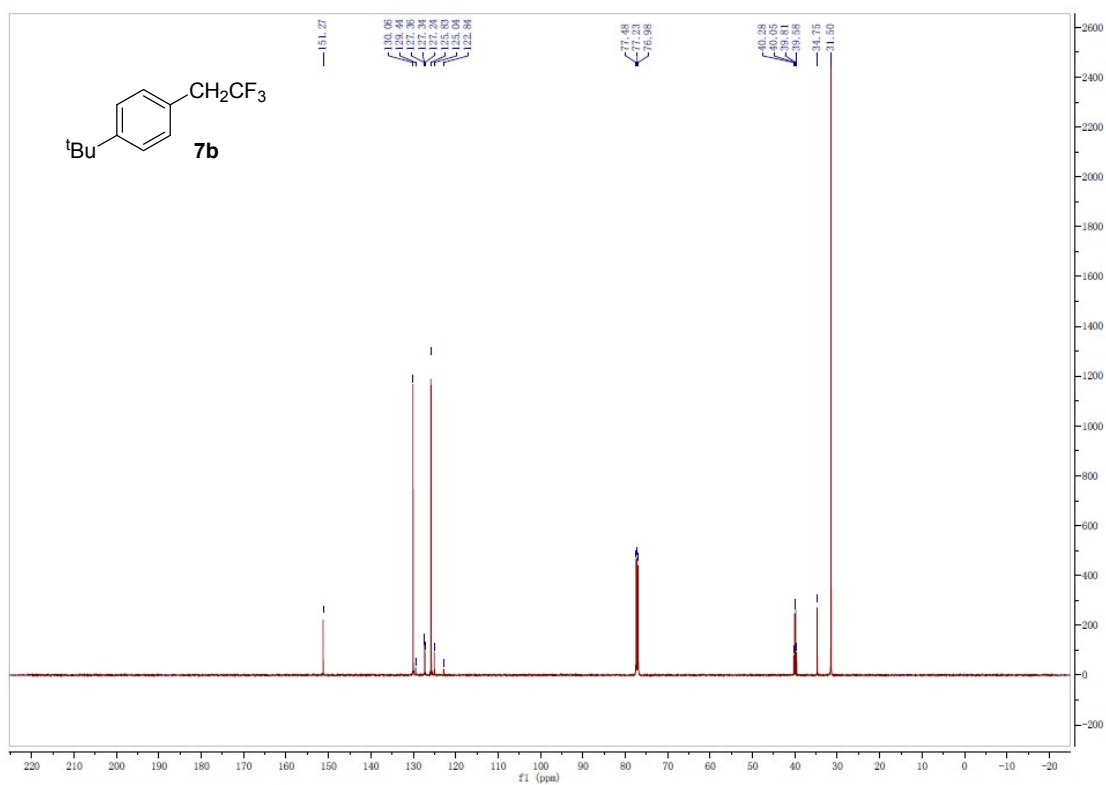

Figure S10. <sup>13</sup>C NMR of **7b** in CDCl<sub>3</sub>

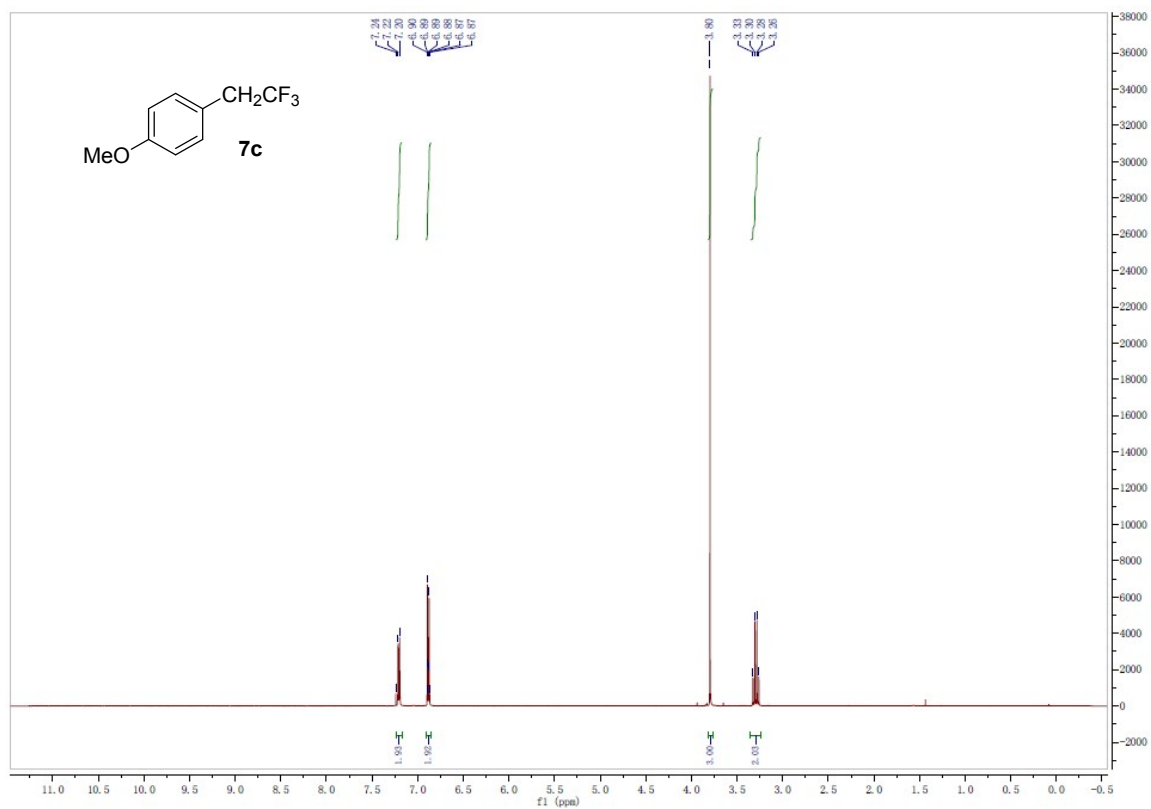

**Figure S11. <sup>1</sup>H NMR of 7c in CDCl<sub>3</sub>**

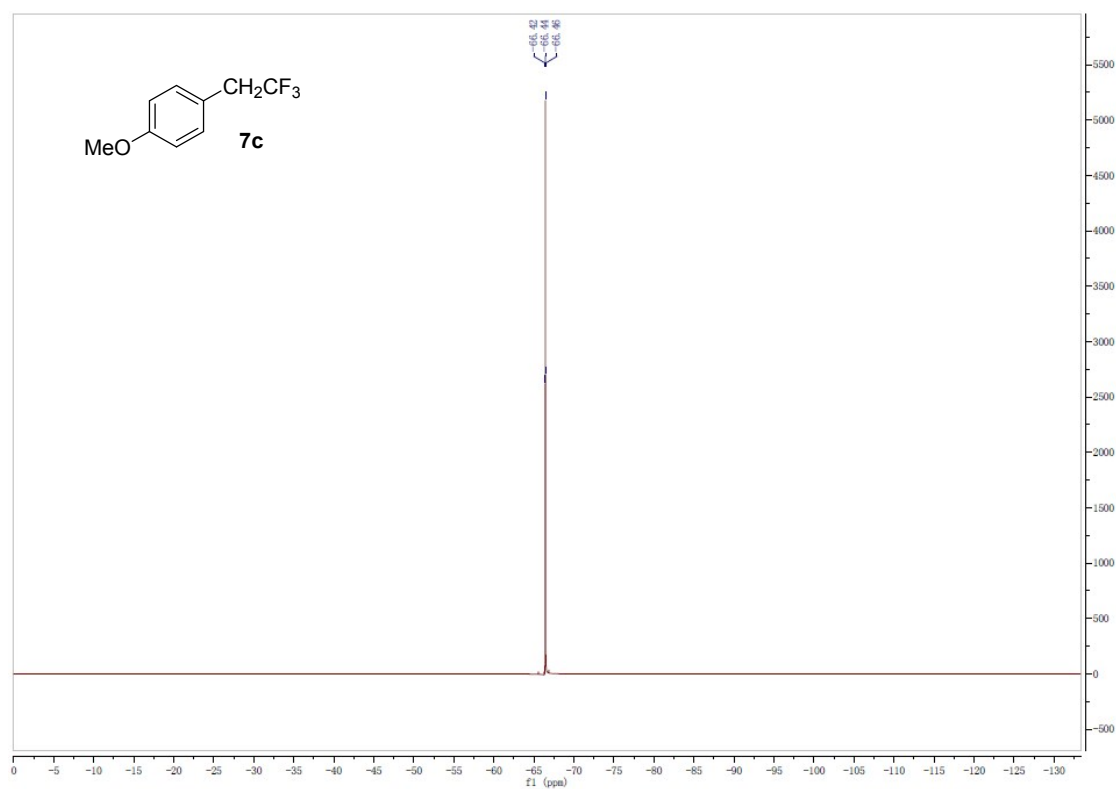

**Figure S12. <sup>19</sup>F NMR of 7c in CDCl<sub>3</sub>**

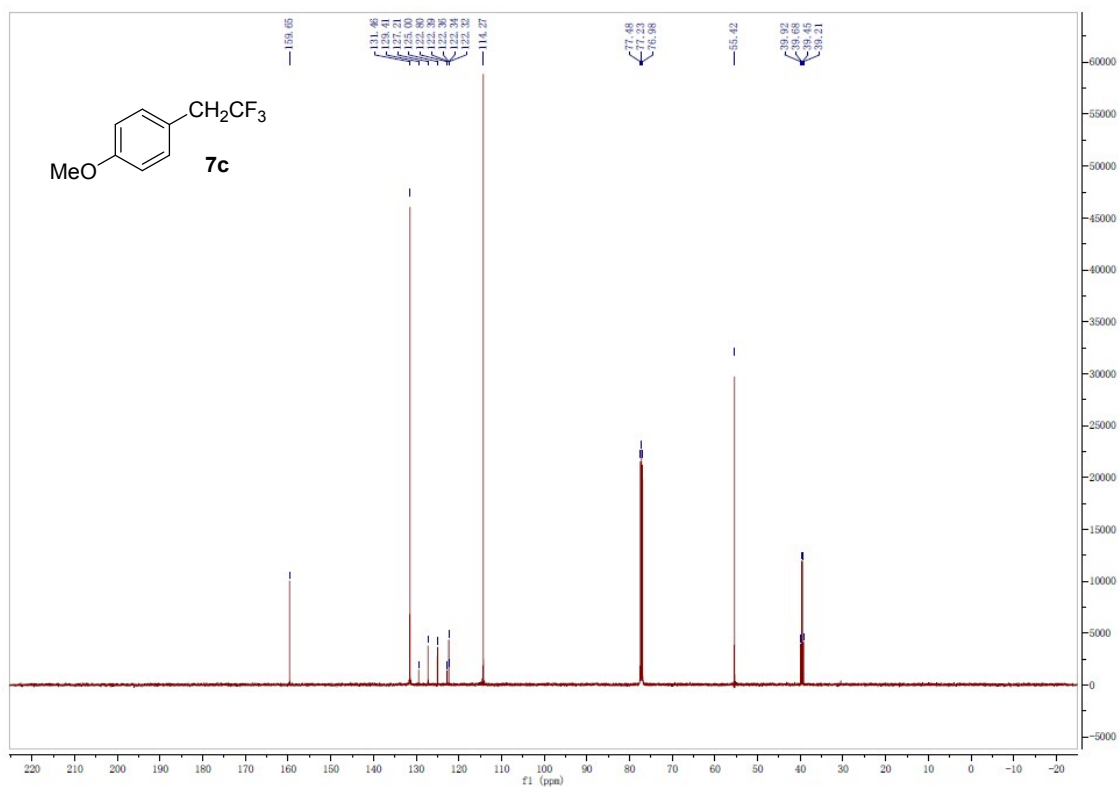

Figure S13. <sup>13</sup>C NMR of **7c** in CDCl<sub>3</sub>

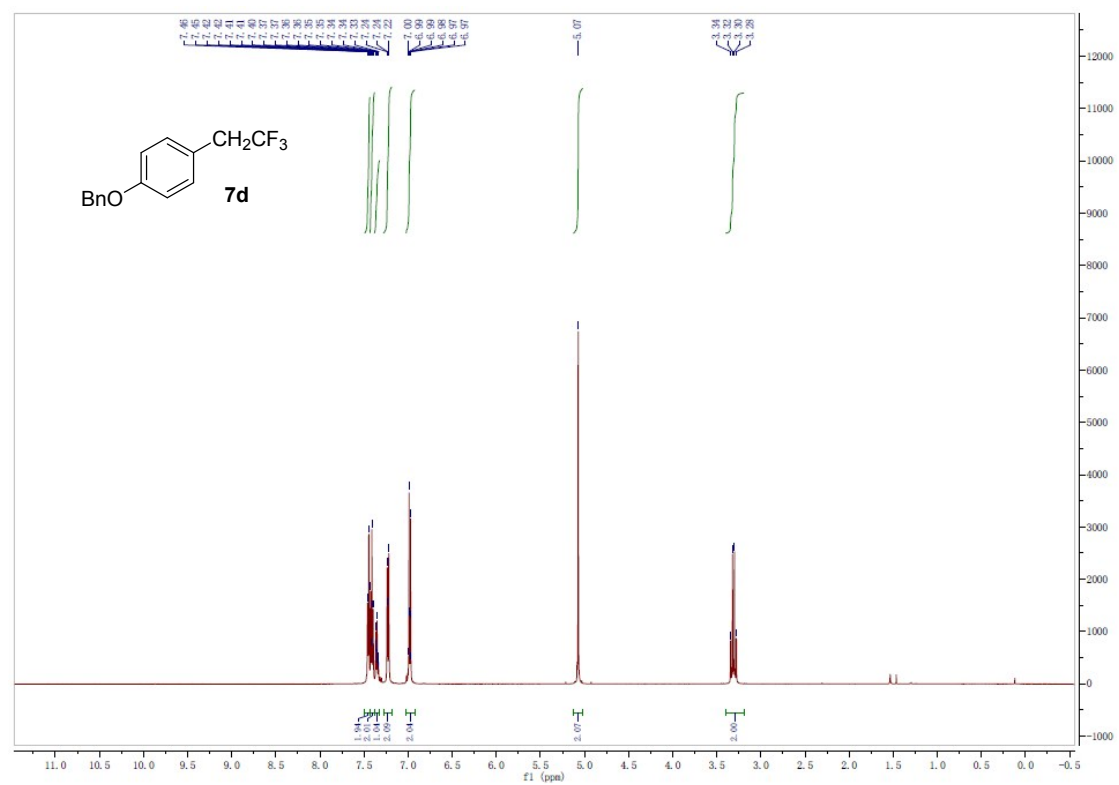



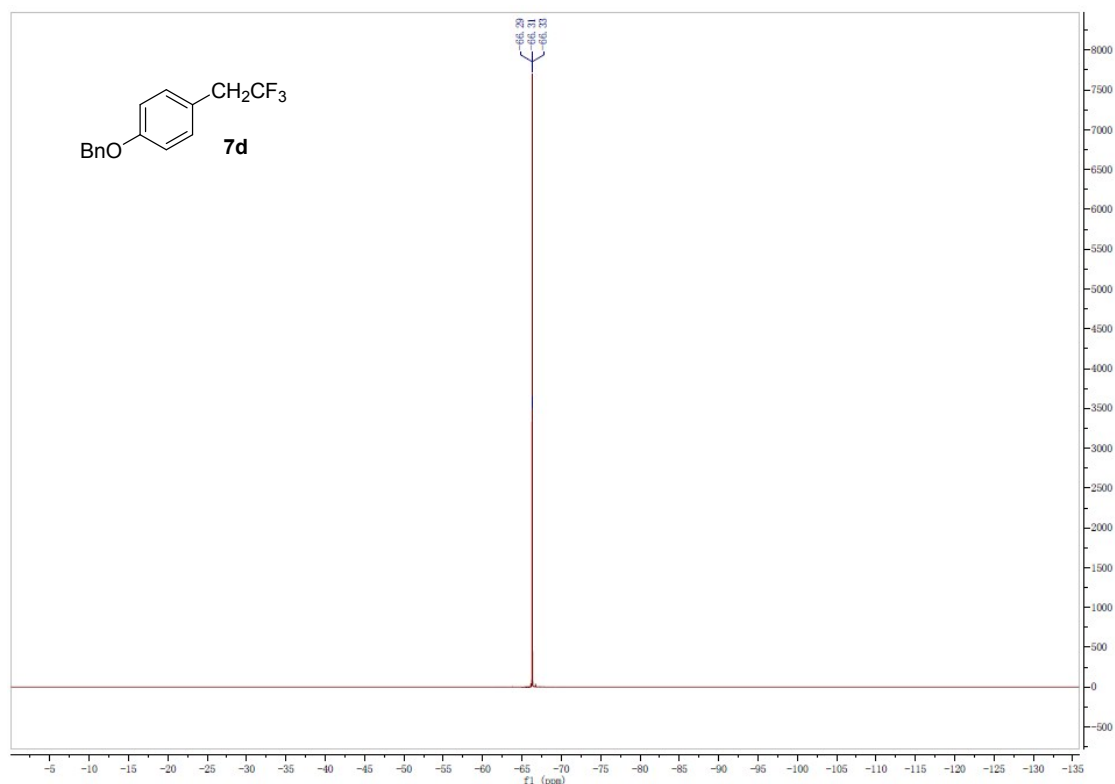

Figure S15. <sup>19</sup>F NMR of **7d** in CDCl<sub>3</sub>

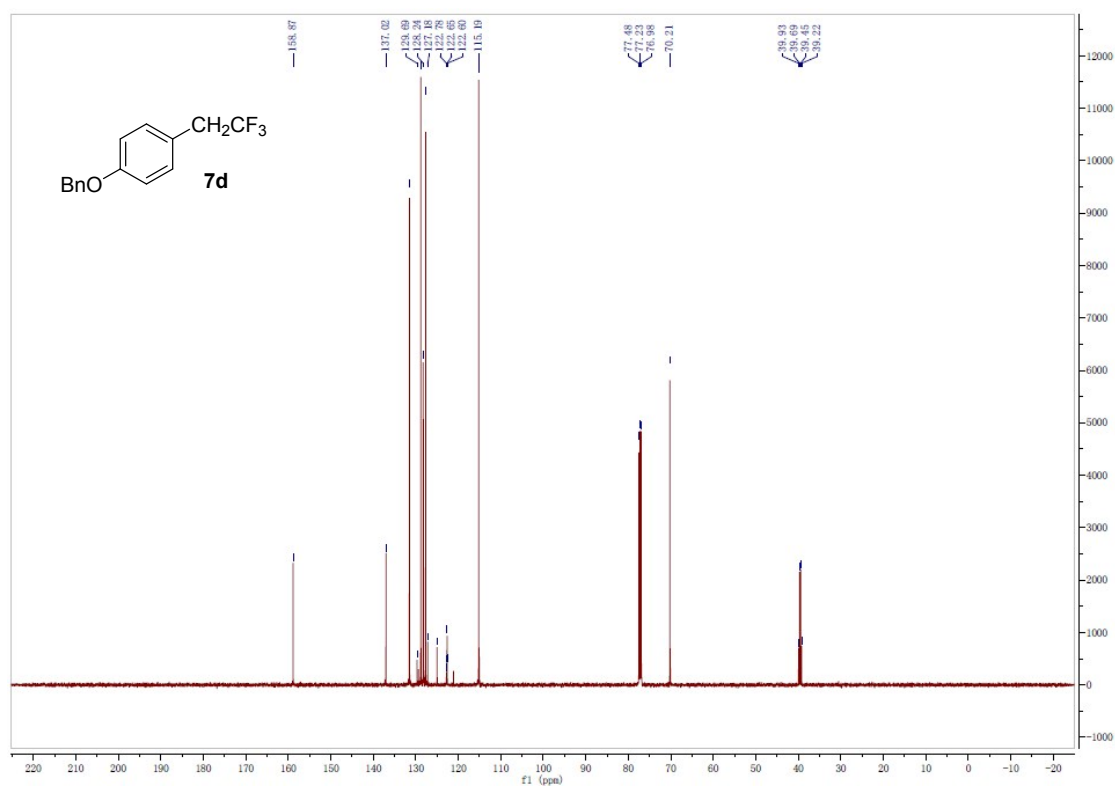

Figure S16. <sup>13</sup>C NMR of **7d** in CDCl<sub>3</sub>

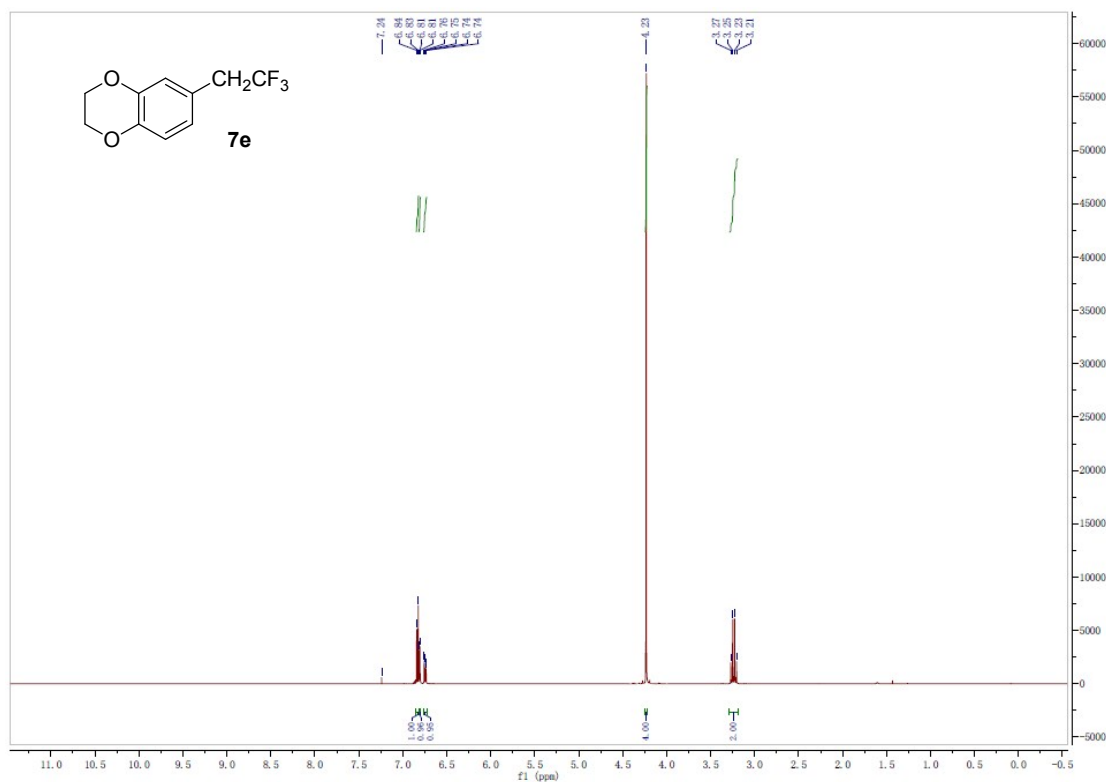

Figure S17. <sup>1</sup>H NMR of **7e** in CDCl<sub>3</sub>

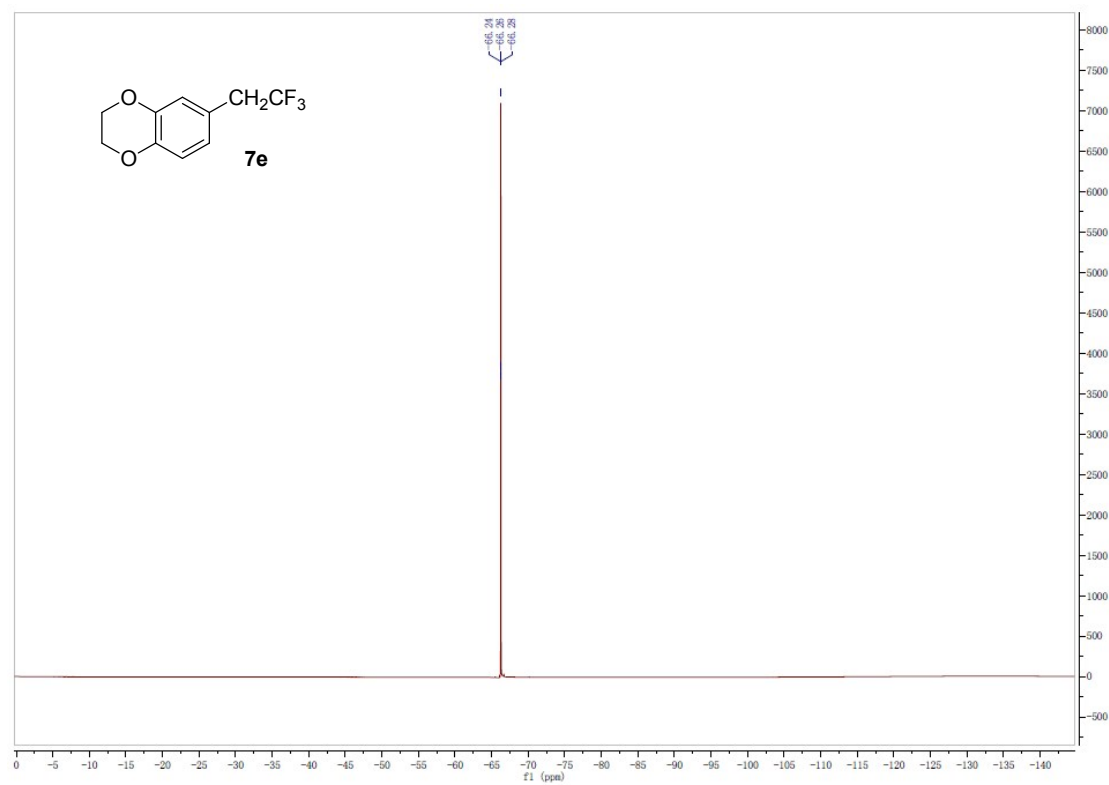

Figure S18. <sup>19</sup>F NMR of **7e** in CDCl<sub>3</sub>

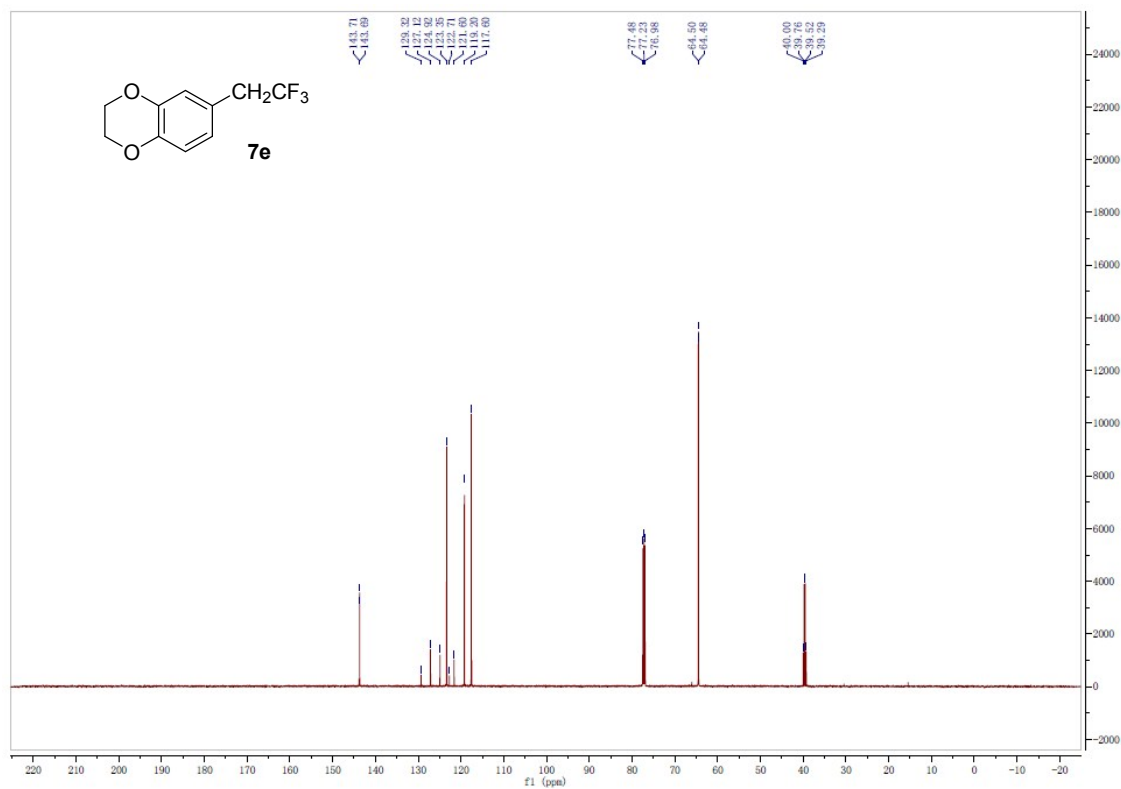

Figure S19. <sup>13</sup>C NMR of **7e** in CDCl<sub>3</sub>

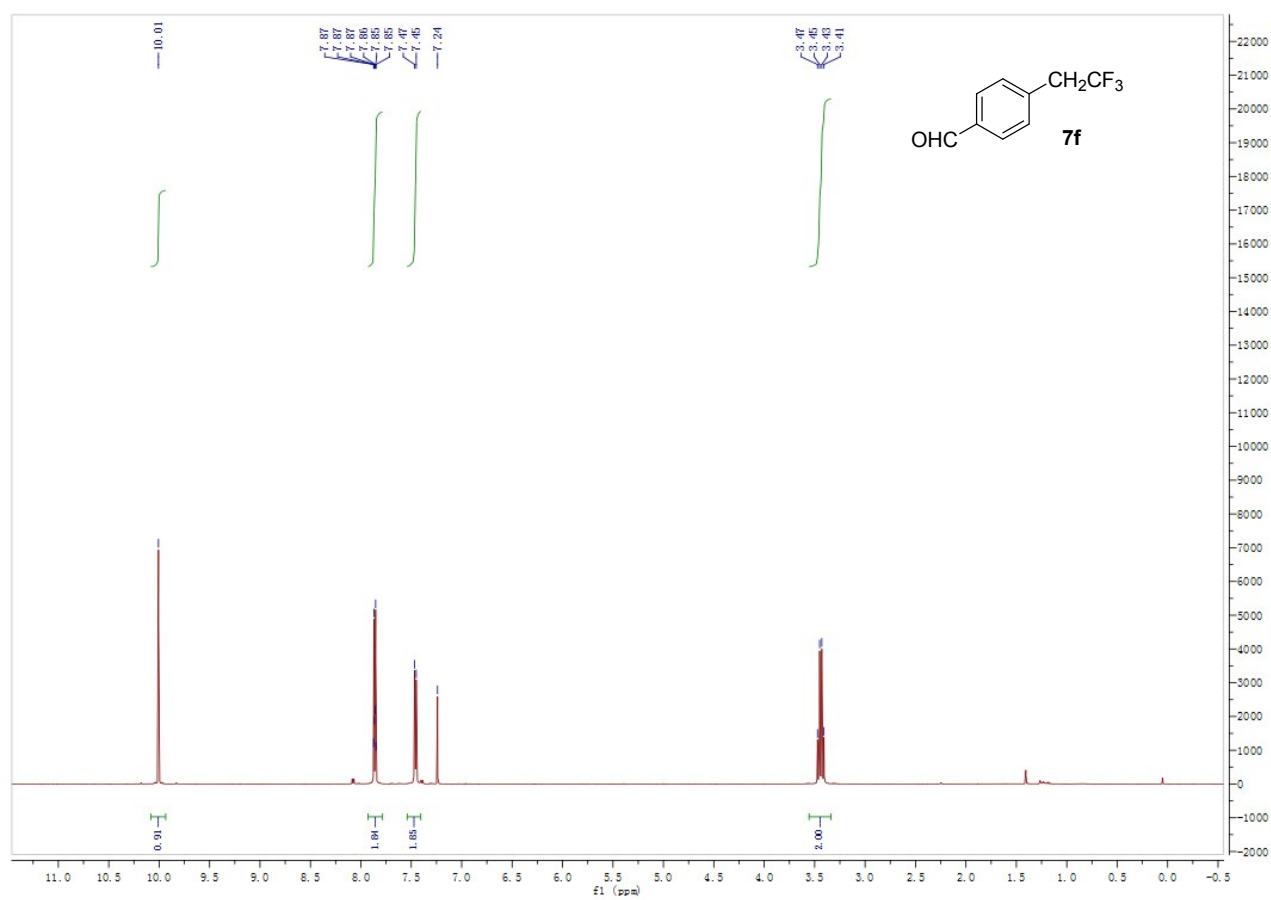

Figure S20. <sup>1</sup>H NMR of **7f** in CDCl<sub>3</sub>

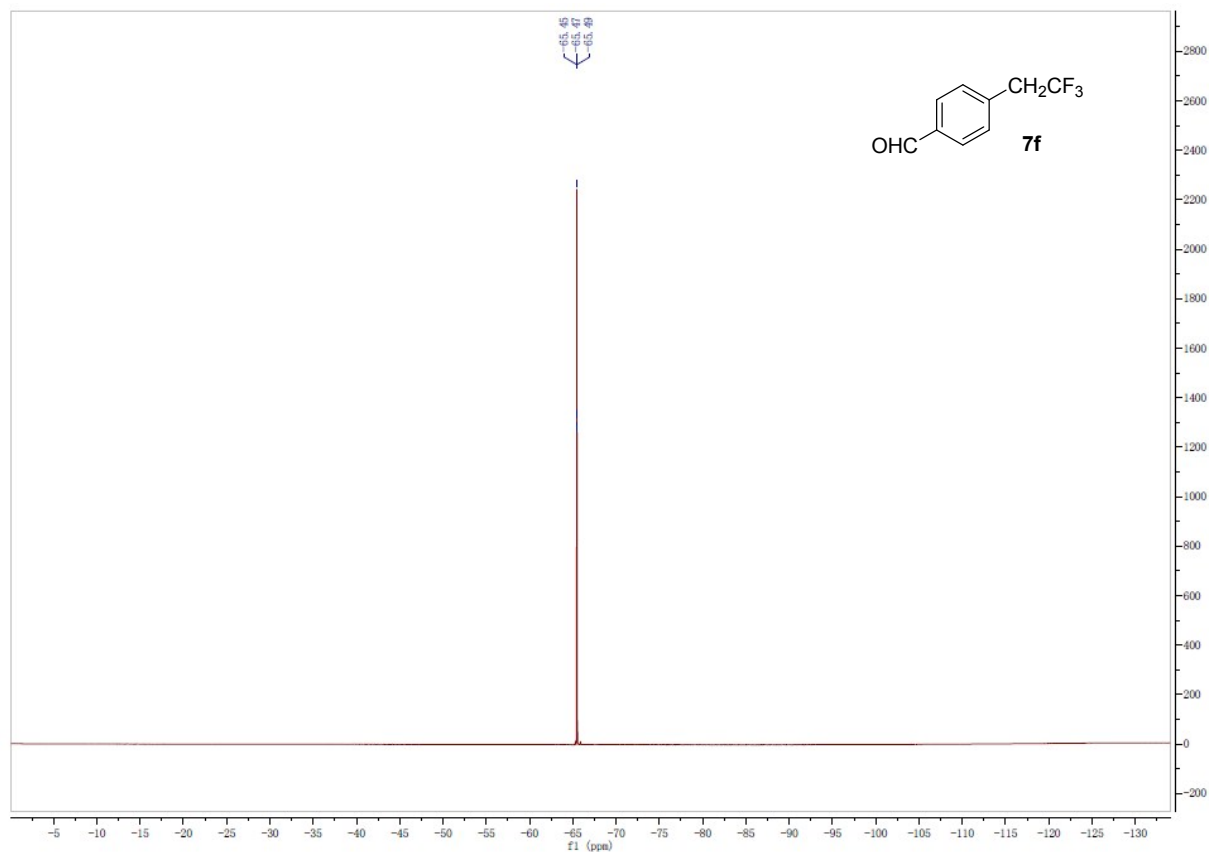

Figure S21. <sup>19</sup>F NMR of **7f** in CDCl<sub>3</sub>

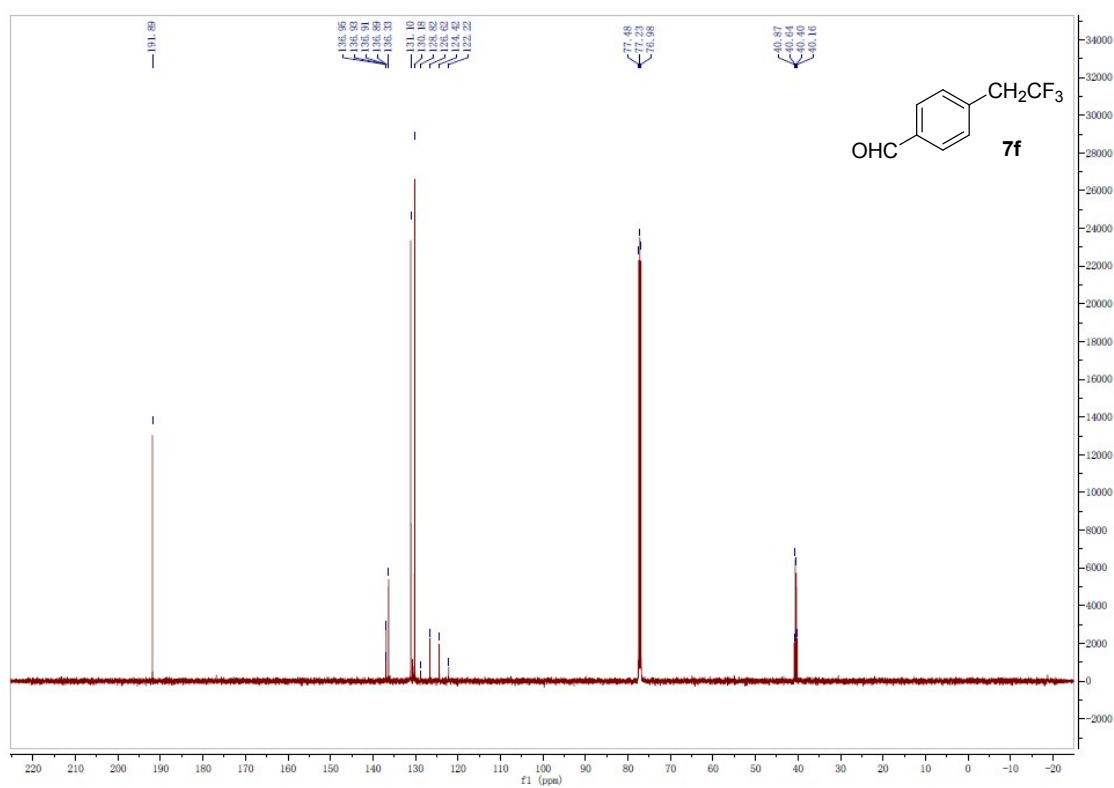

Figure S22. <sup>13</sup>C NMR of **7f** in CDCl<sub>3</sub>

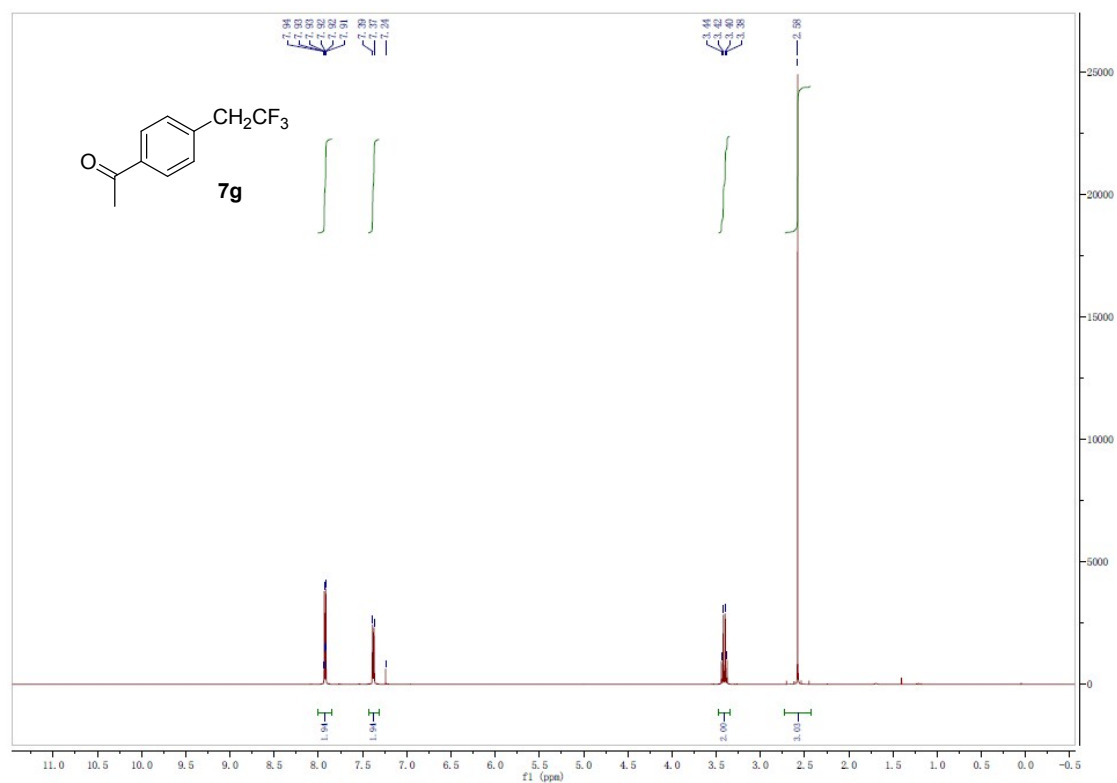

Figure S23. <sup>1</sup>H NMR of **7g** in CDCl<sub>3</sub>

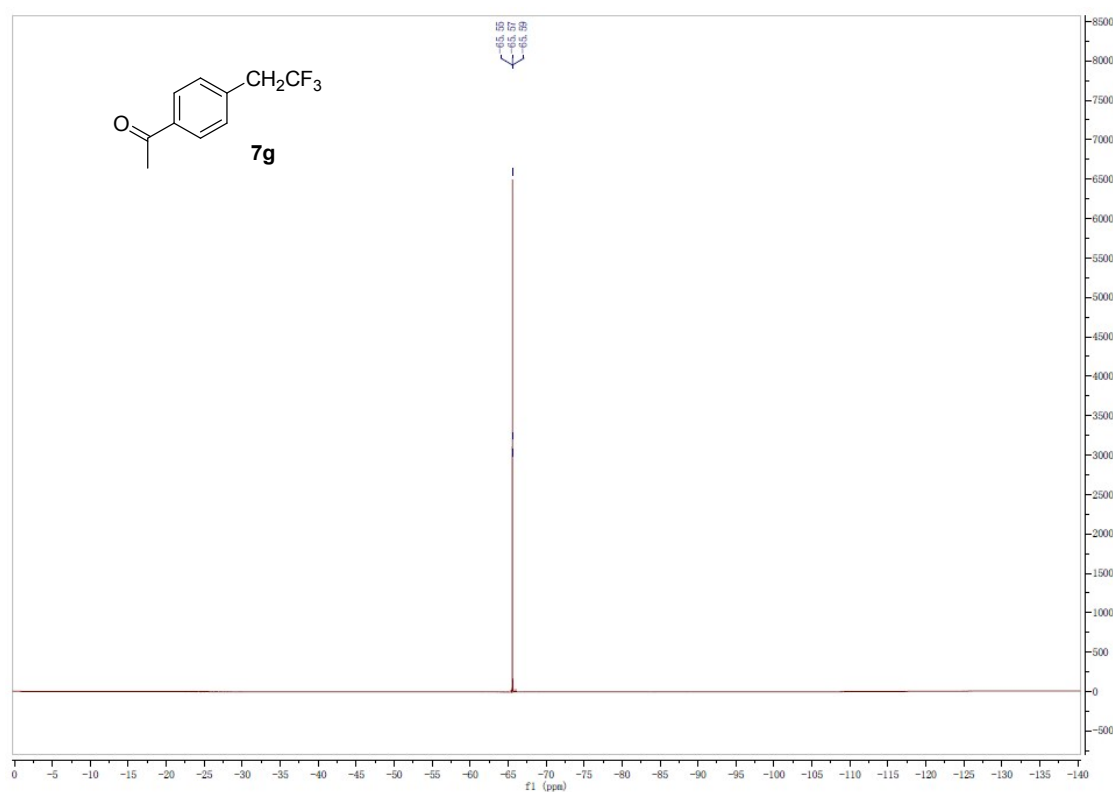

Figure S24. <sup>19</sup>F NMR of **7g** in CDCl<sub>3</sub>

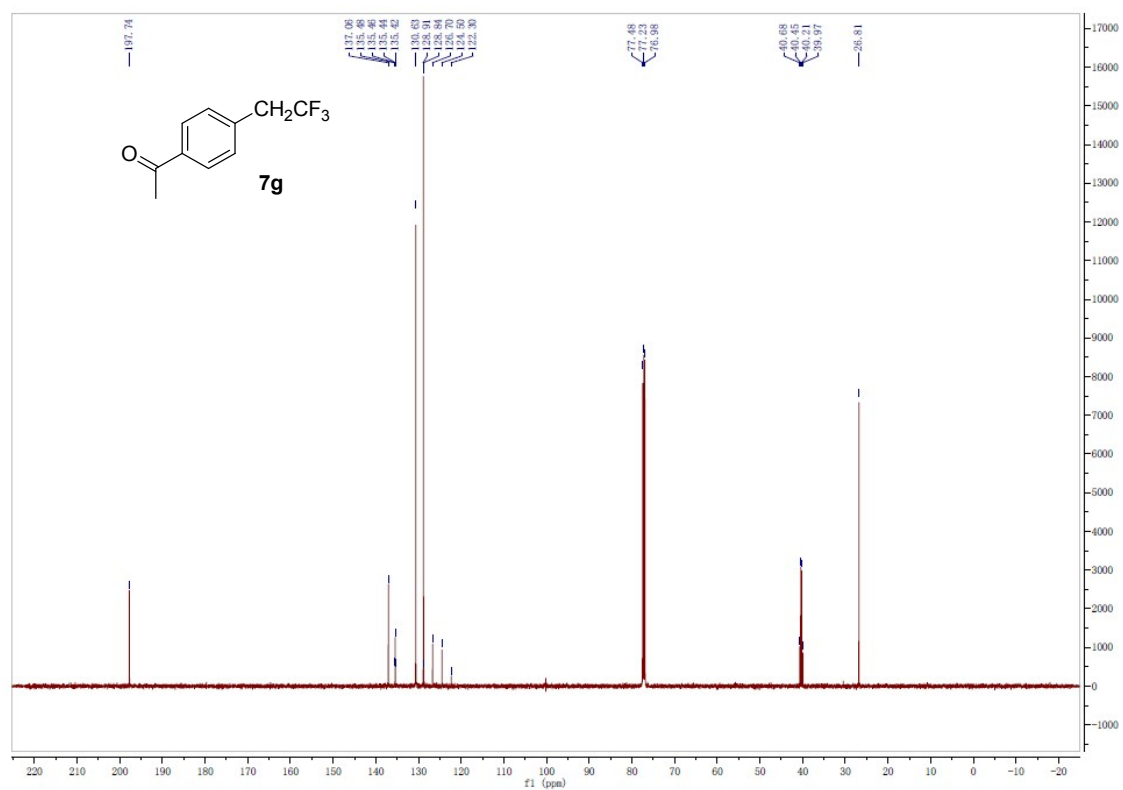

Figure S25. <sup>13</sup>C NMR of **7g** in CDCl<sub>3</sub>

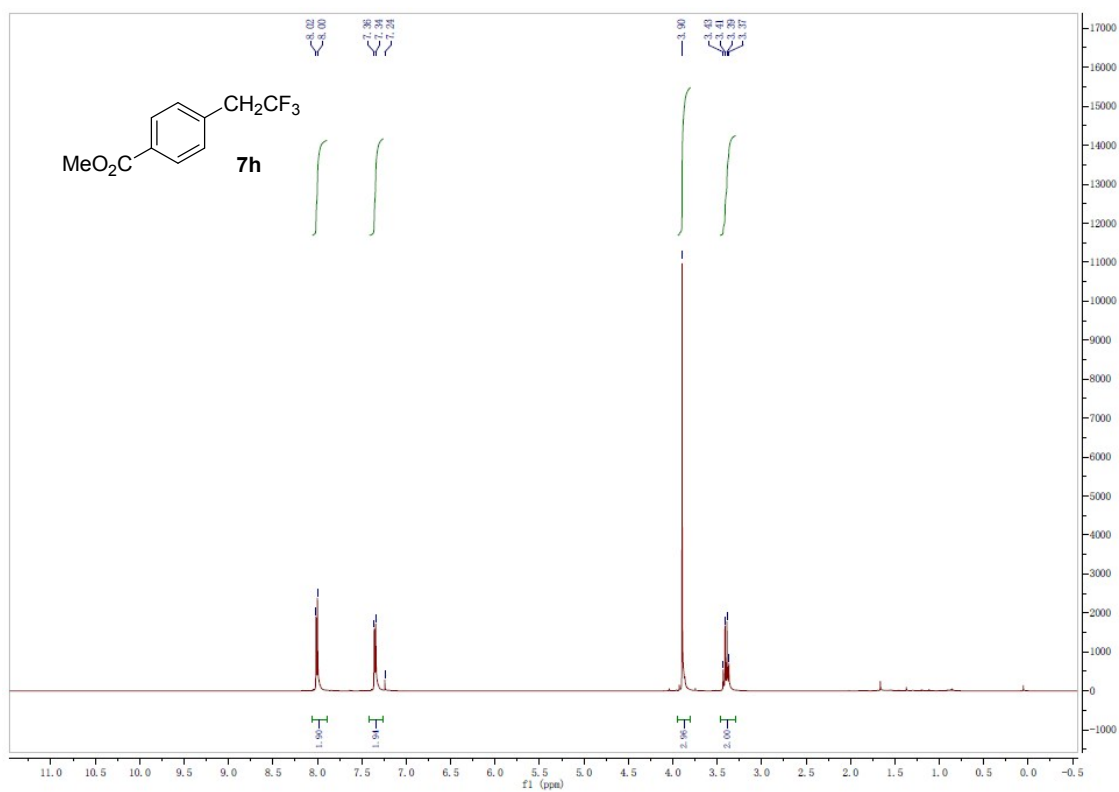

Figure S26. <sup>1</sup>H NMR of **7h** in CDCl<sub>3</sub>

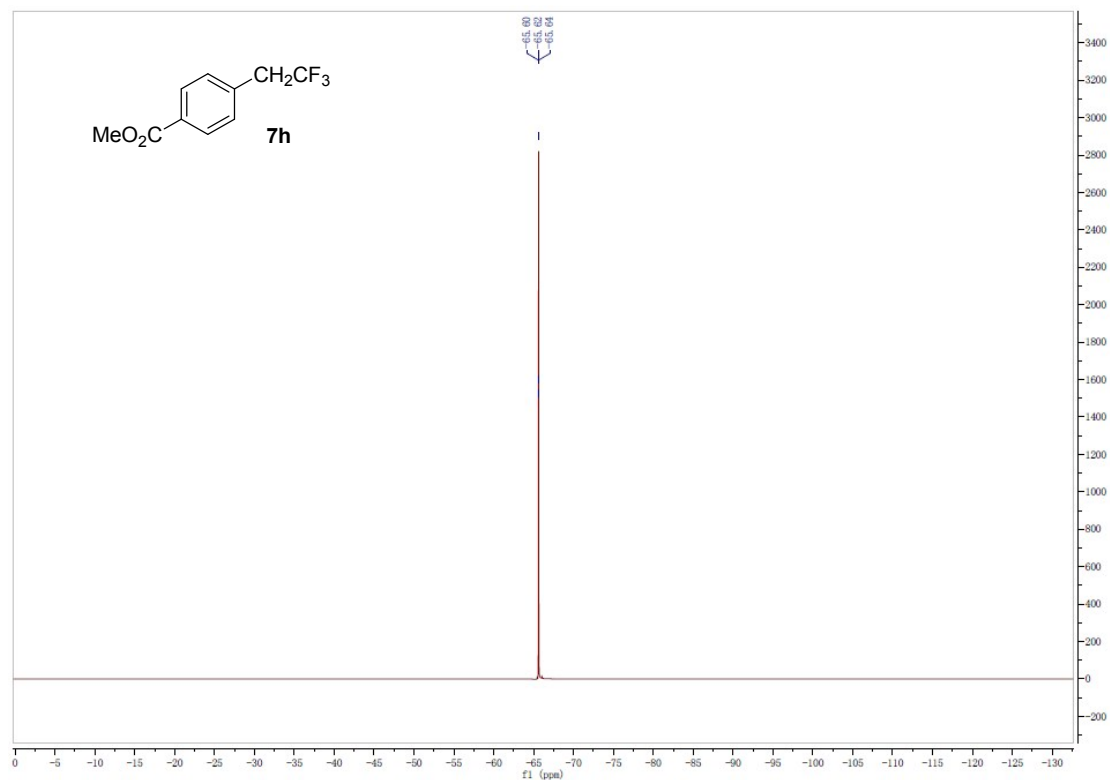

Figure S27. <sup>19</sup>F NMR of **7h** in CDCl<sub>3</sub>

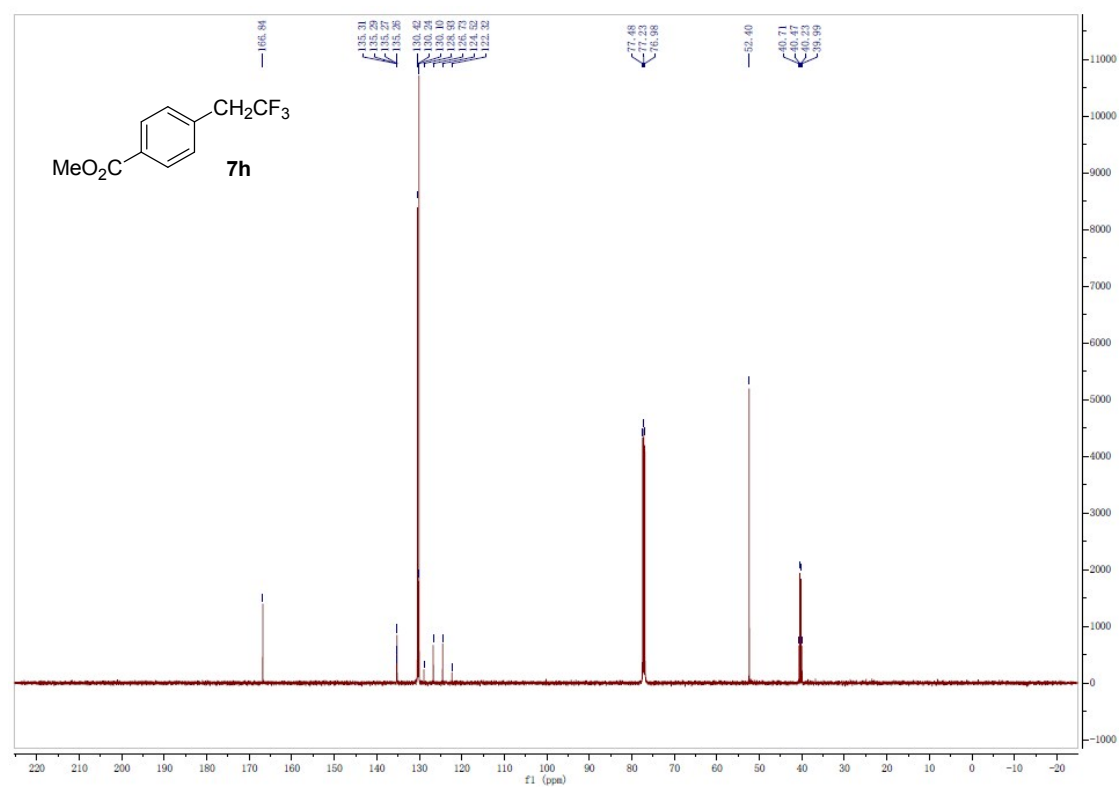

Figure S28. <sup>13</sup>C NMR of **7h** in CDCl<sub>3</sub>

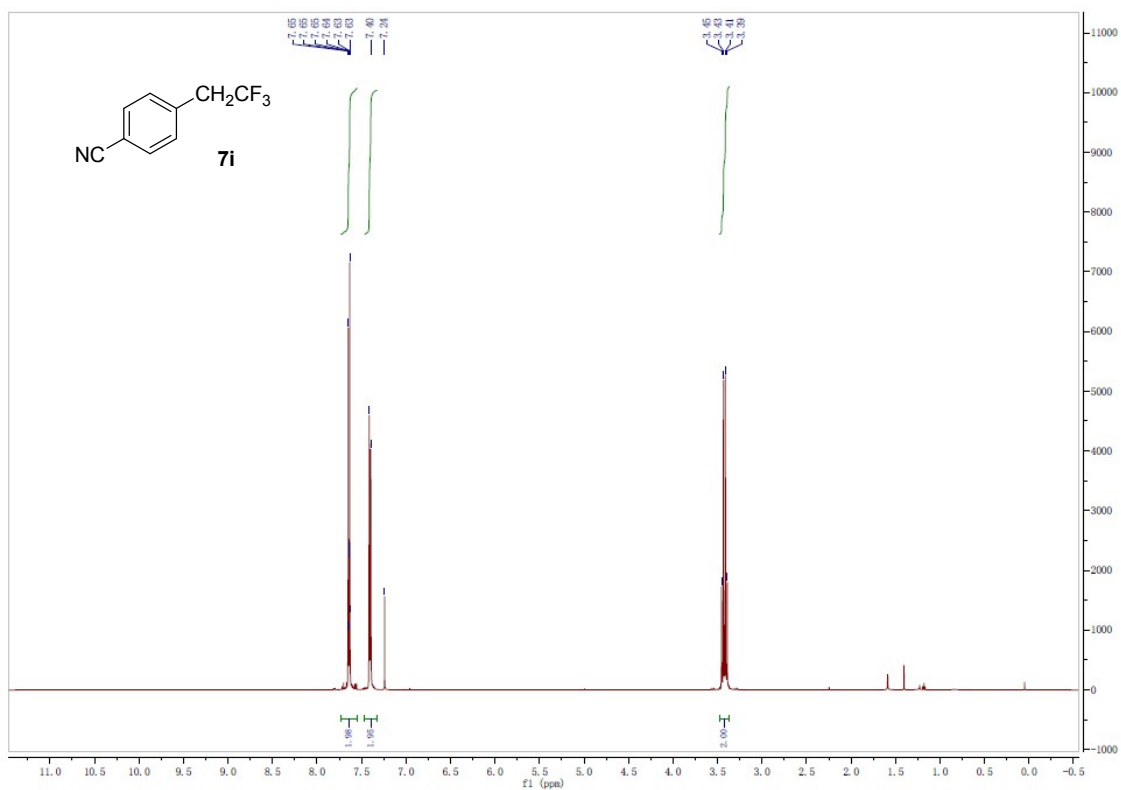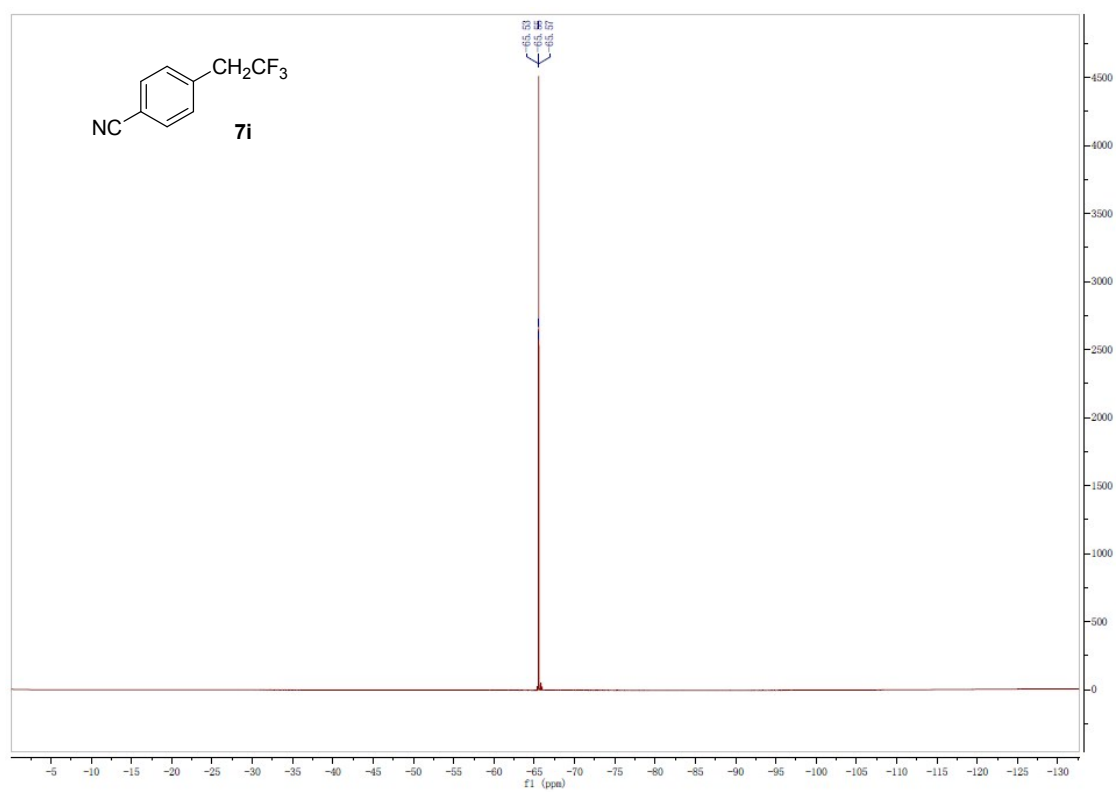



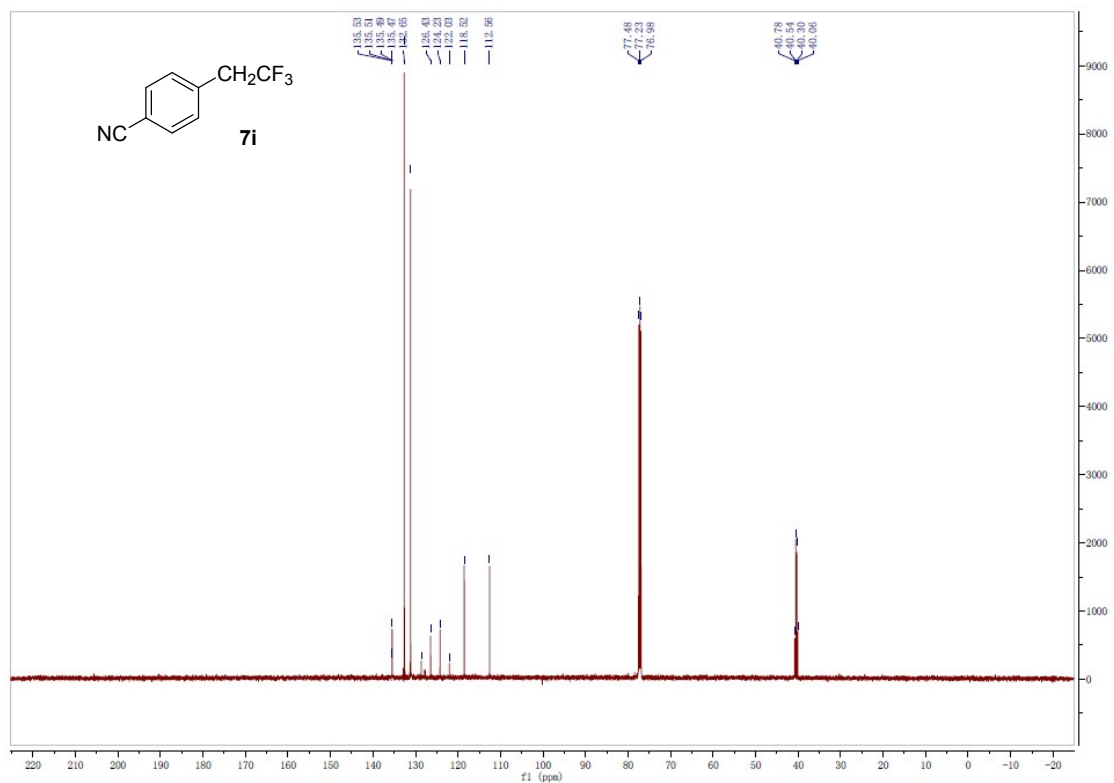

Figure S31. <sup>13</sup>C NMR of **7i** in CDCl<sub>3</sub>

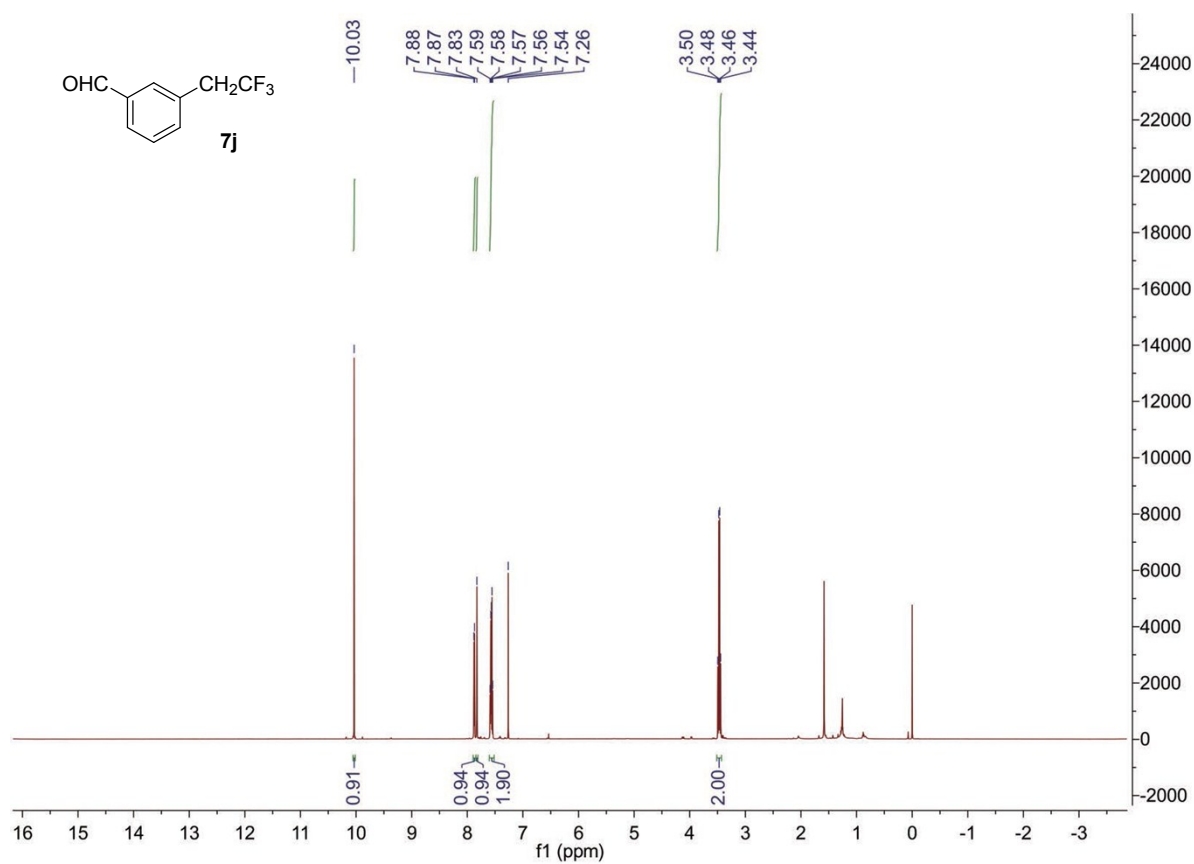

Figure S32. <sup>1</sup>H NMR of **7j** in CDCl<sub>3</sub>

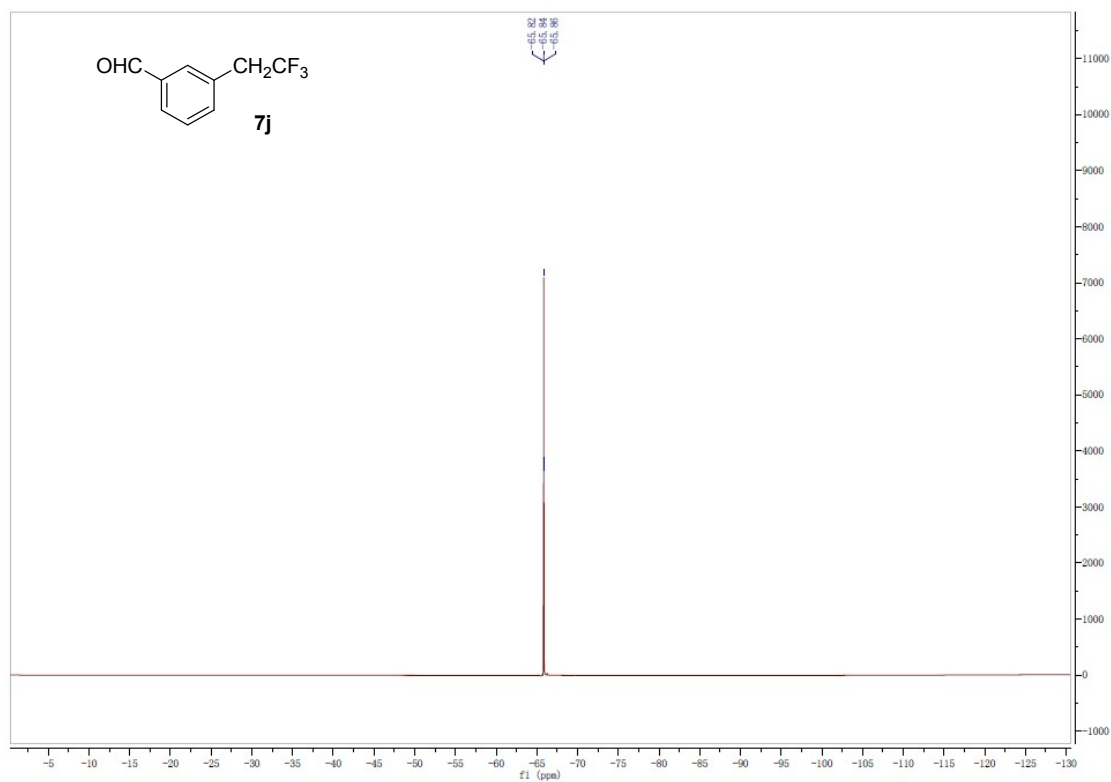

Figure S33. <sup>19</sup>F NMR of **7j** in CDCl<sub>3</sub>

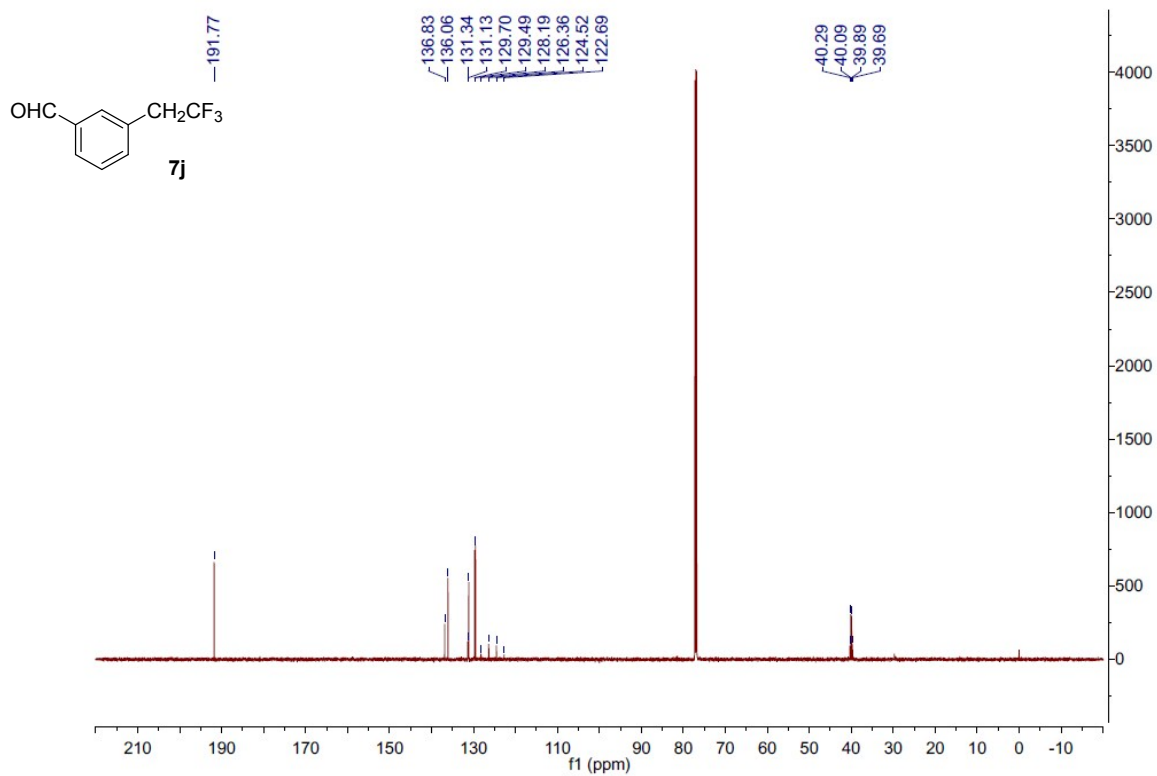

Figure S34. <sup>13</sup>C NMR of **7j** in CDCl<sub>3</sub>

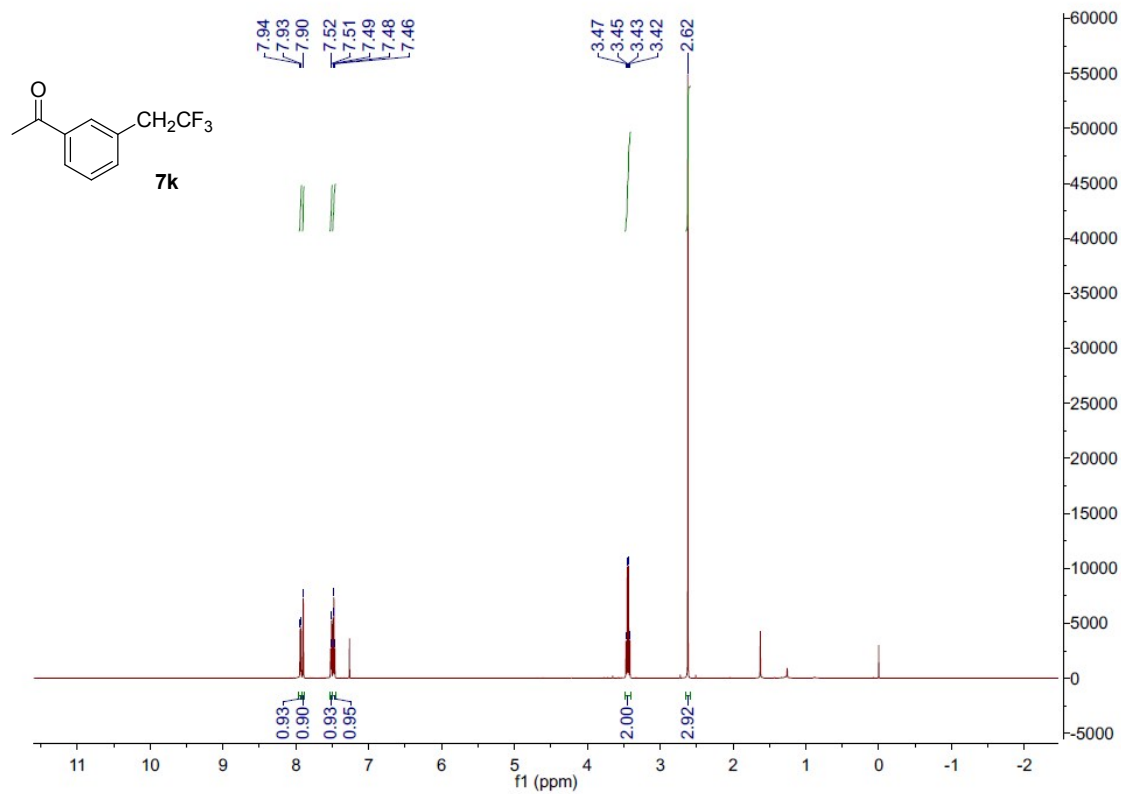

Figure S35. <sup>1</sup>H NMR of **7k** in CDCl<sub>3</sub>

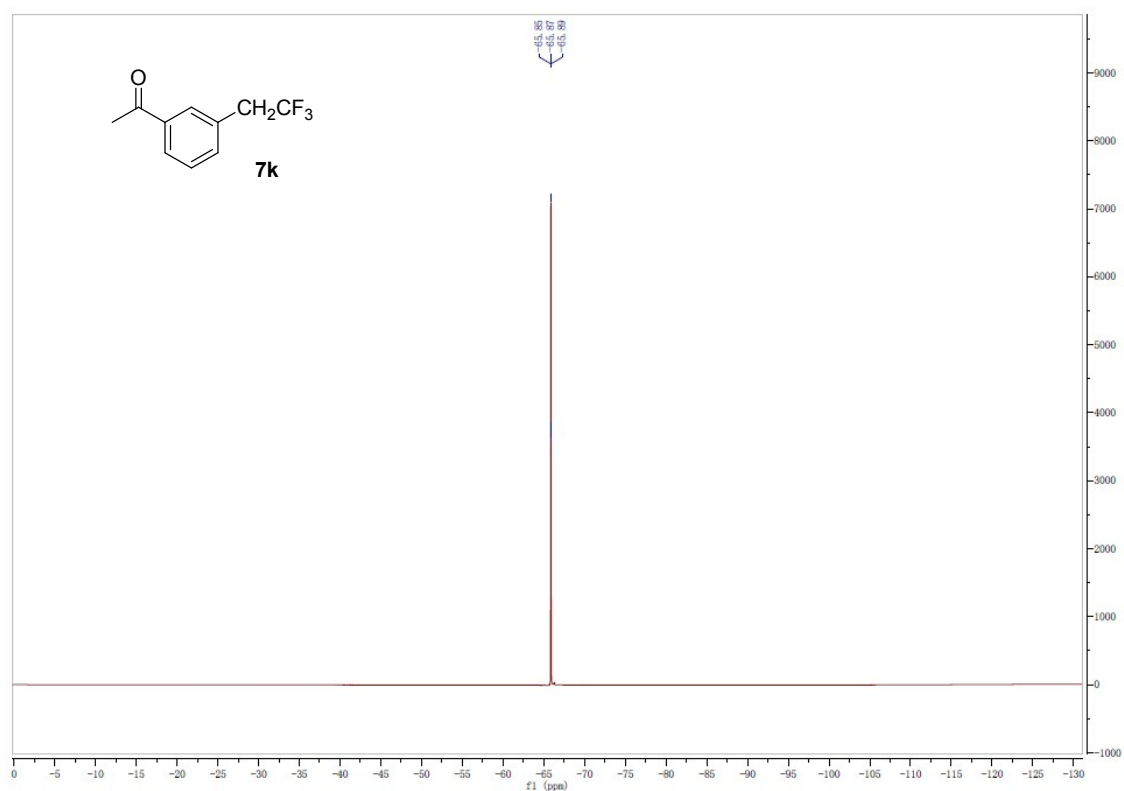

Figure S36. <sup>19</sup>F NMR of **7k** in CDCl<sub>3</sub>

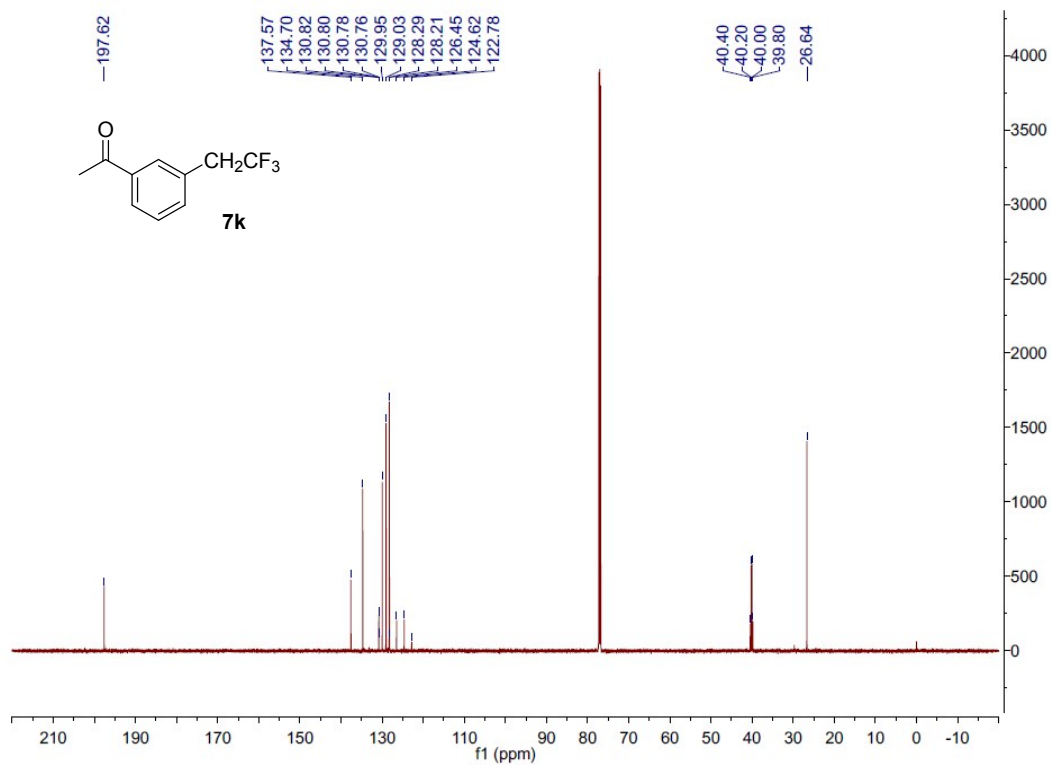

Figure S37. <sup>13</sup>C NMR of **7k** in CDCl<sub>3</sub>

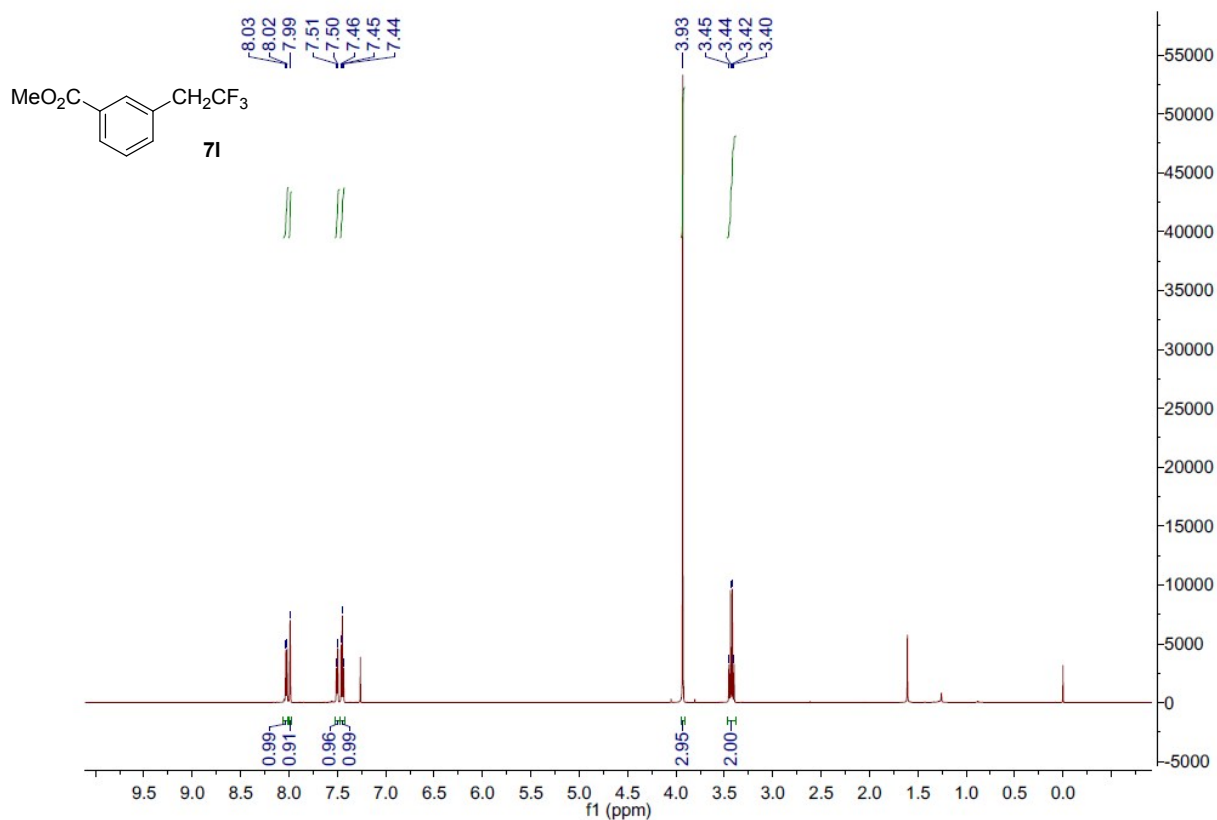

Figure S38. <sup>1</sup>H NMR of **7l** in CDCl<sub>3</sub>

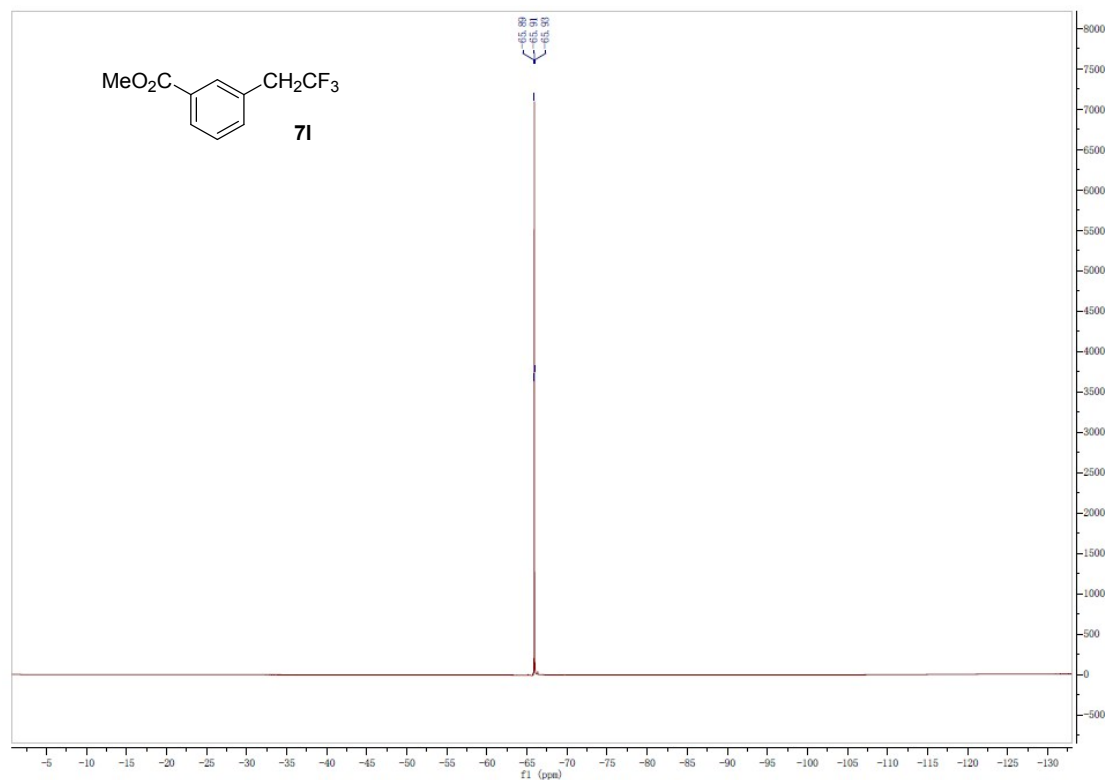

Figure S39. <sup>19</sup>F NMR of **7l** in CDCl<sub>3</sub>

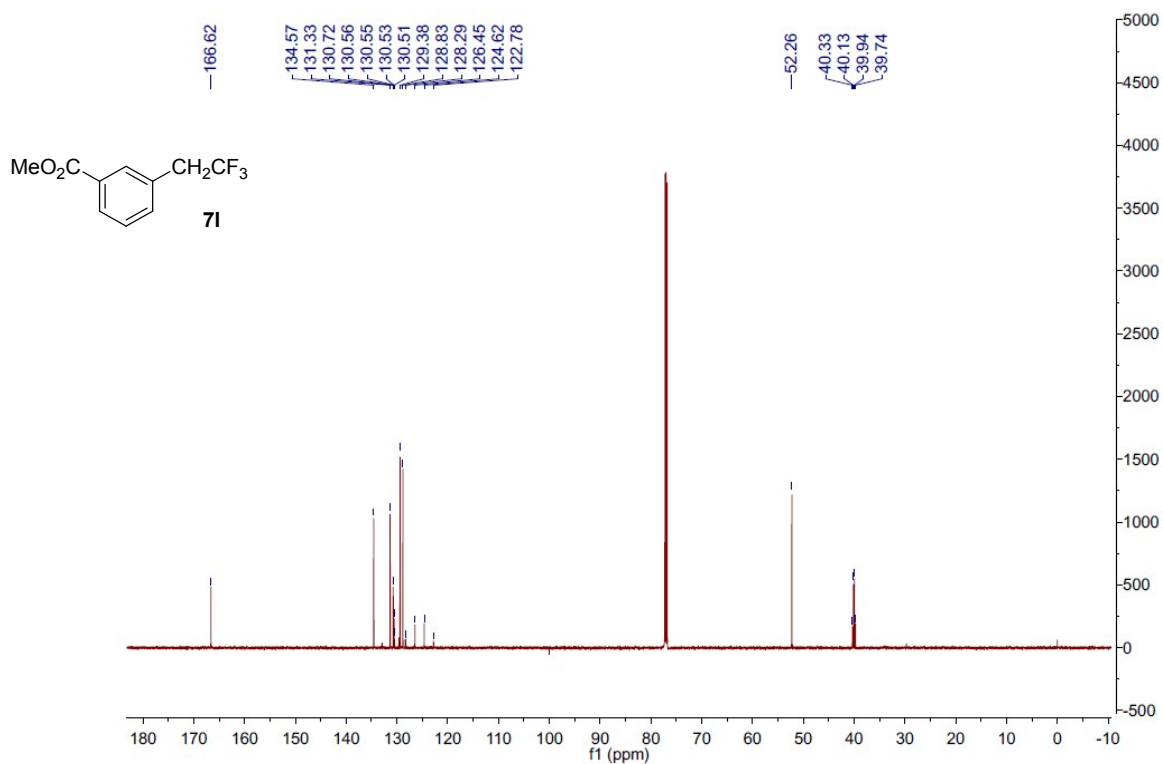

Figure S40. <sup>13</sup>C NMR of **7l** in CDCl<sub>3</sub>

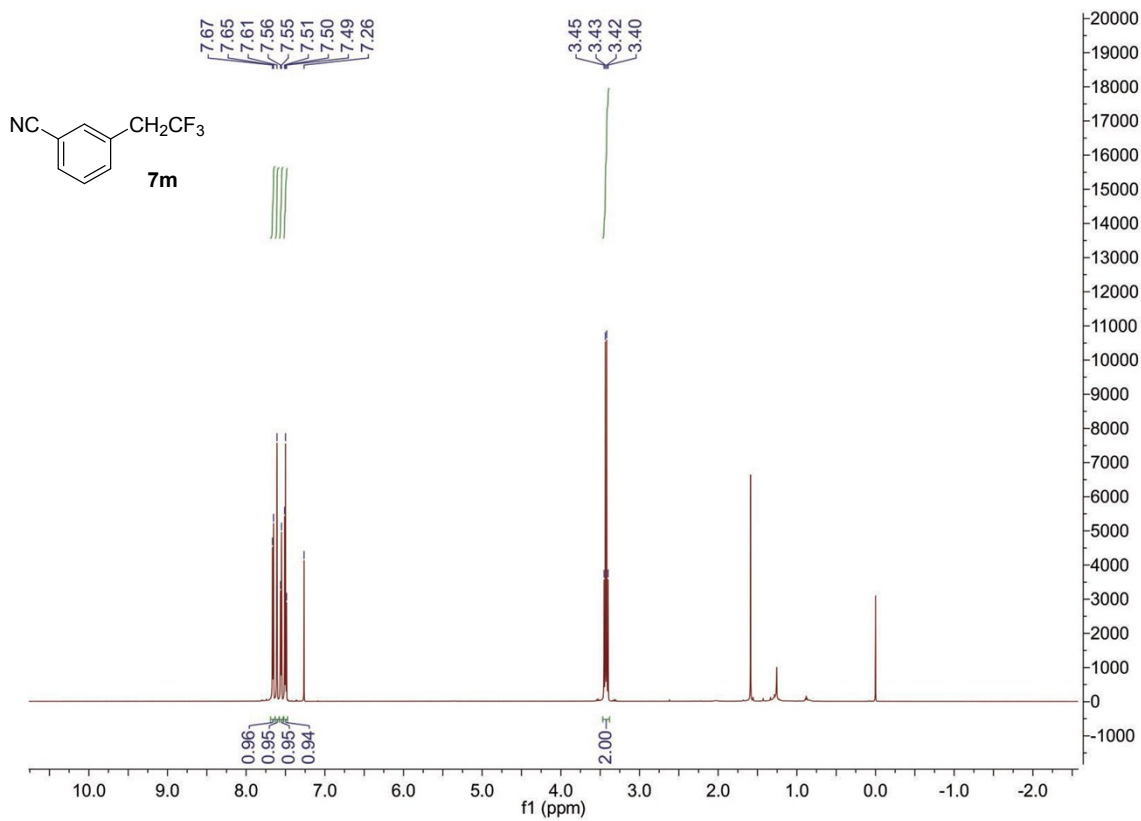

Figure S41. <sup>1</sup>H NMR of **7m** in CDCl<sub>3</sub>

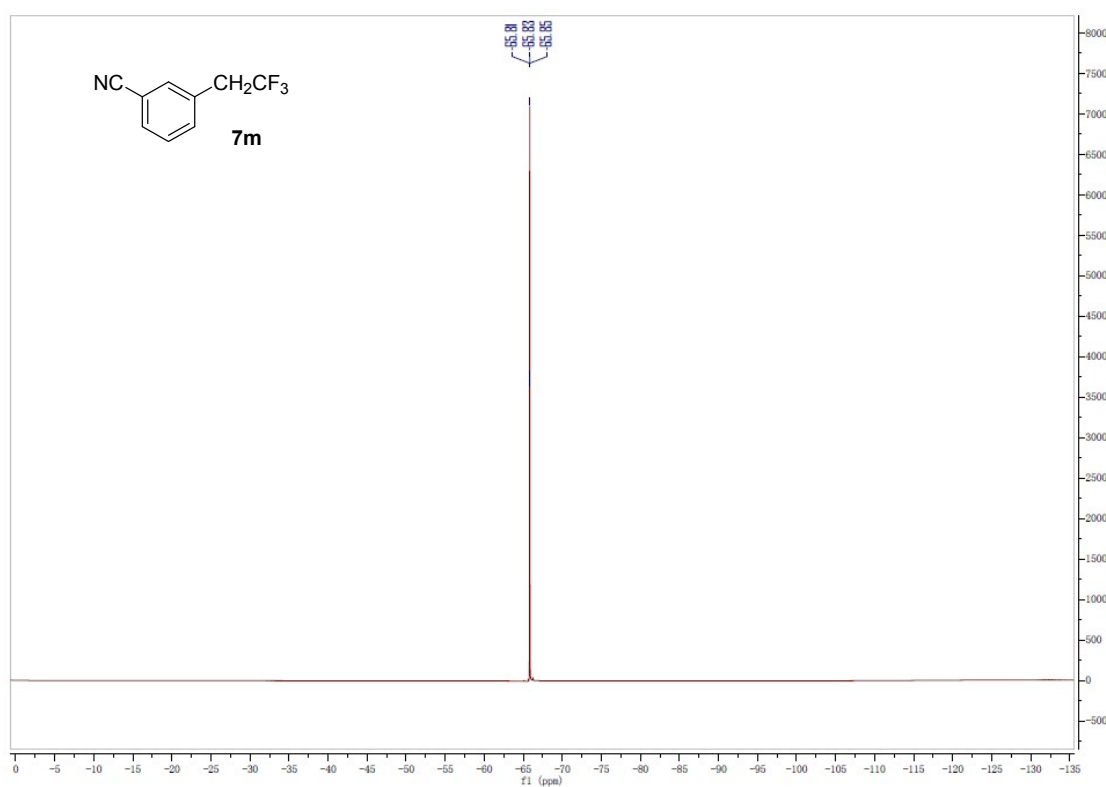

Figure S42. <sup>19</sup>F NMR of **7m** in CDCl<sub>3</sub>

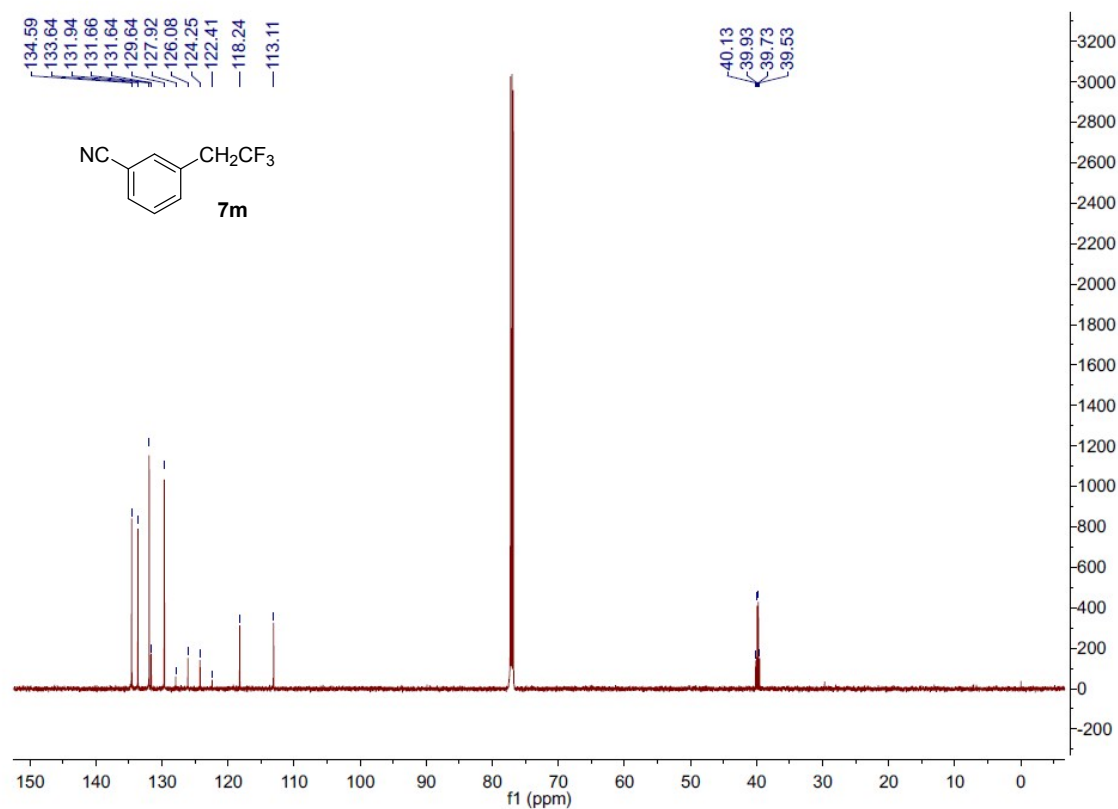

Figure S43. <sup>13</sup>C NMR of **7m** in CDCl<sub>3</sub>

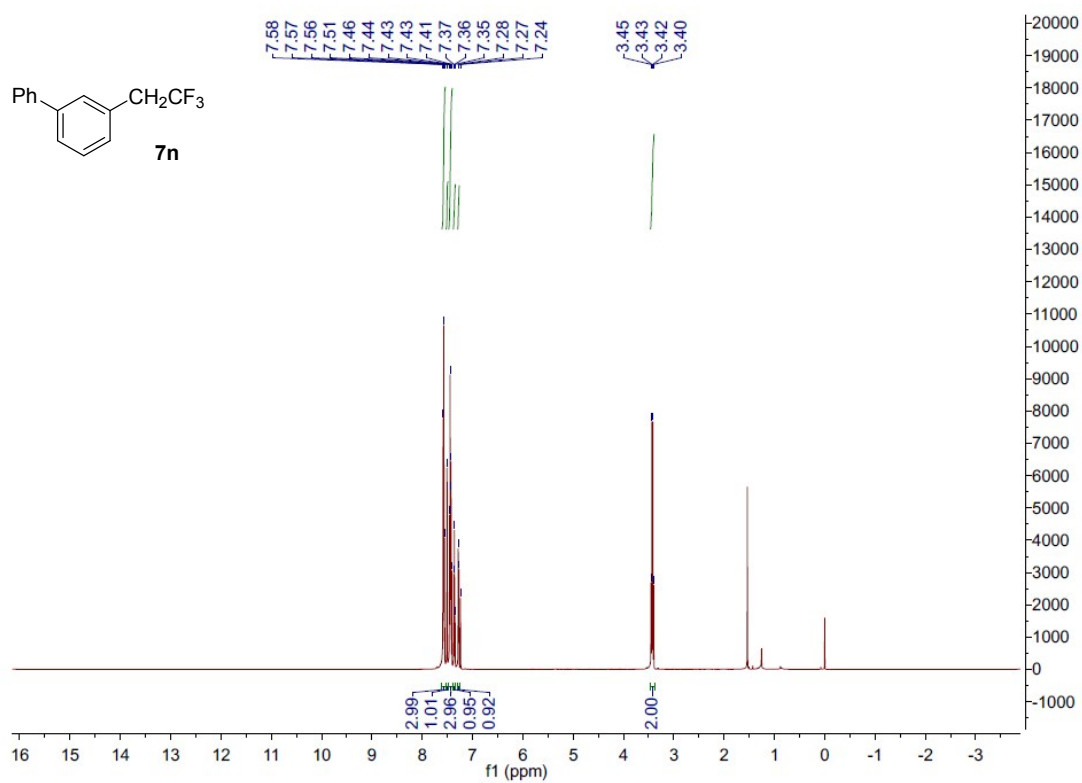

Figure S44. <sup>1</sup>H NMR of **7n** in CDCl<sub>3</sub>

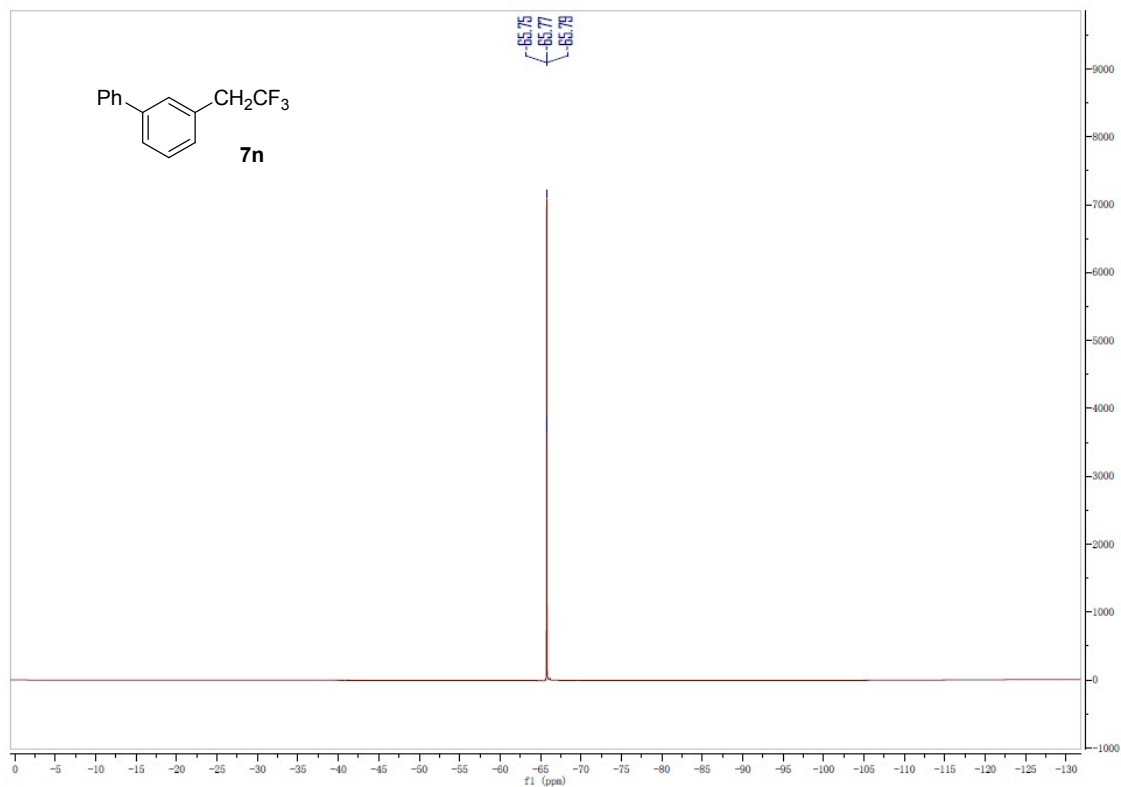

Figure S45. <sup>19</sup>F NMR of **7n** in CDCl<sub>3</sub>

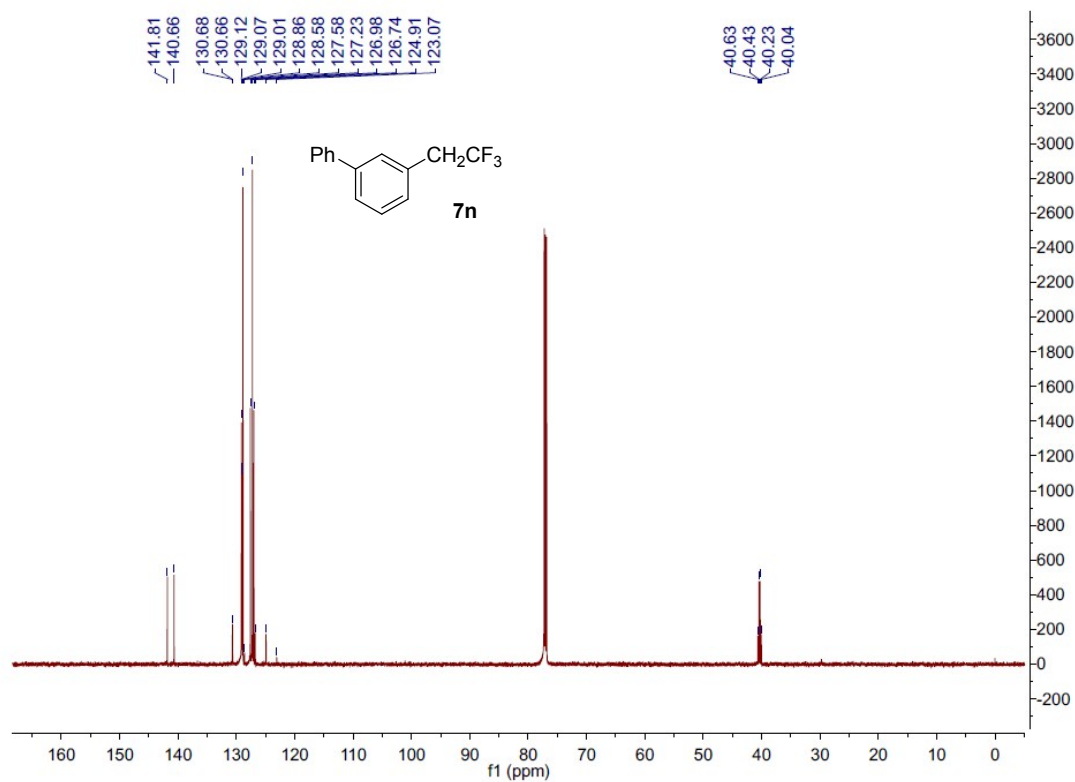

Figure S46. <sup>13</sup>C NMR of **7n** in CDCl<sub>3</sub>



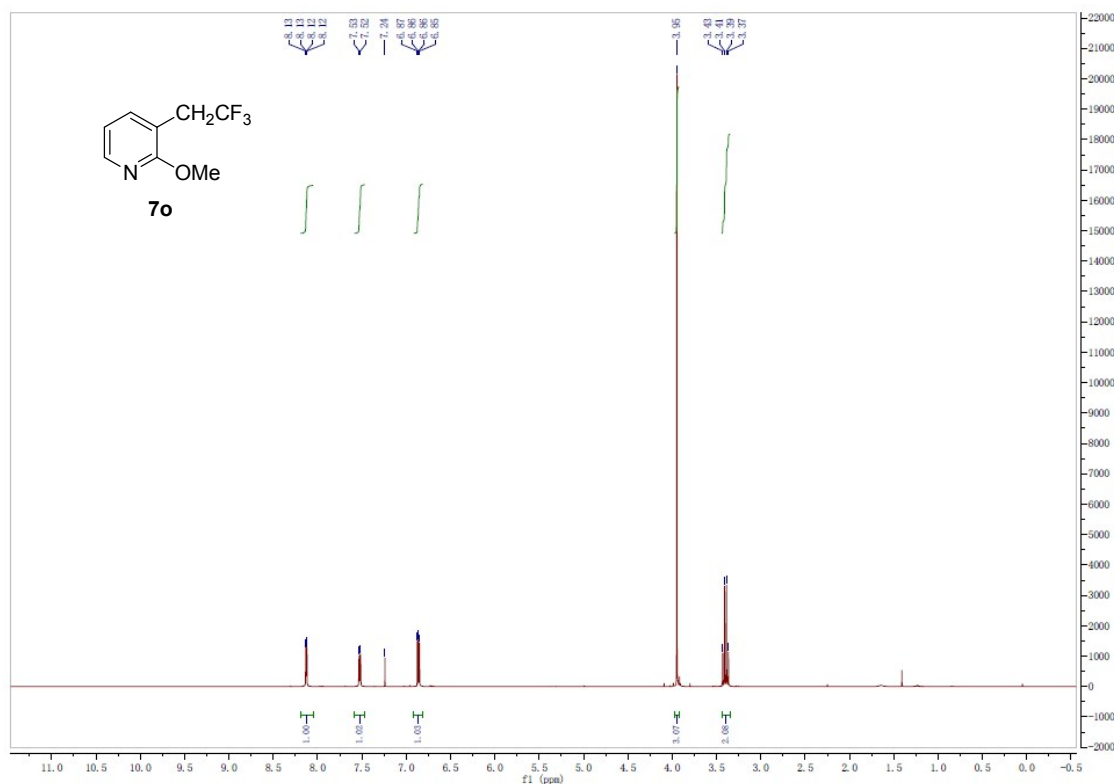

Figure S47. <sup>1</sup>H NMR of **7o** in CDCl<sub>3</sub>

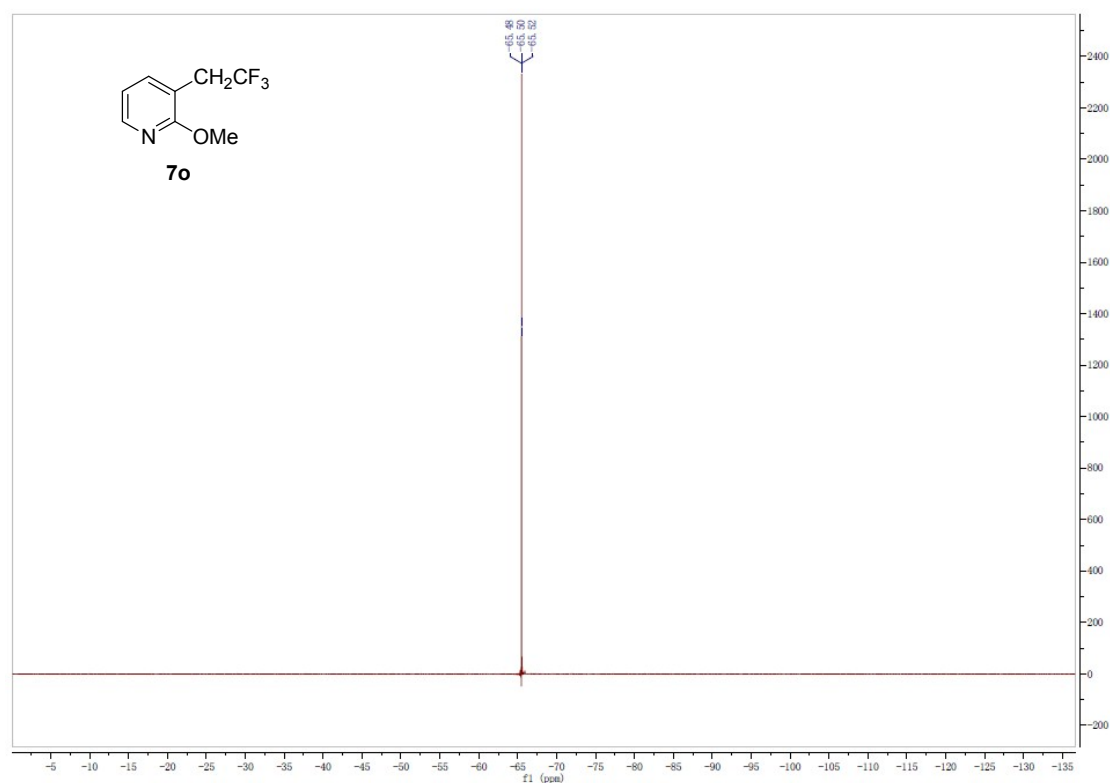

Figure S48. <sup>19</sup>F NMR of **7o** in CDCl<sub>3</sub>

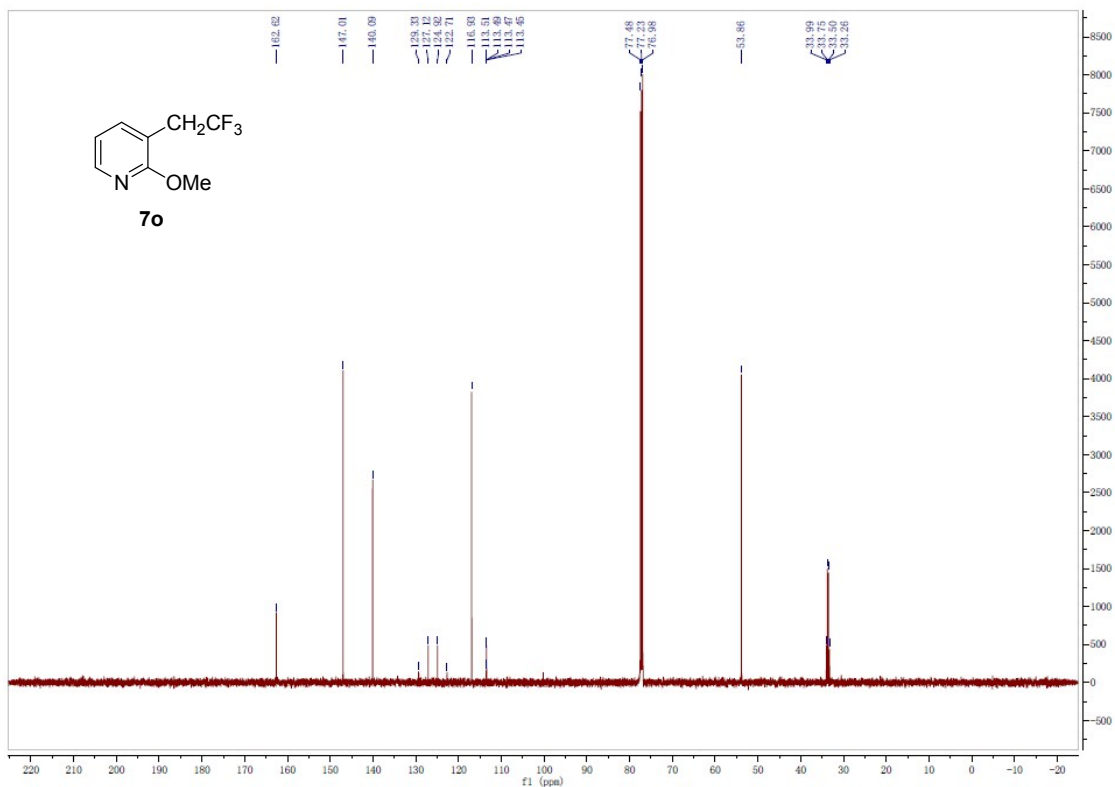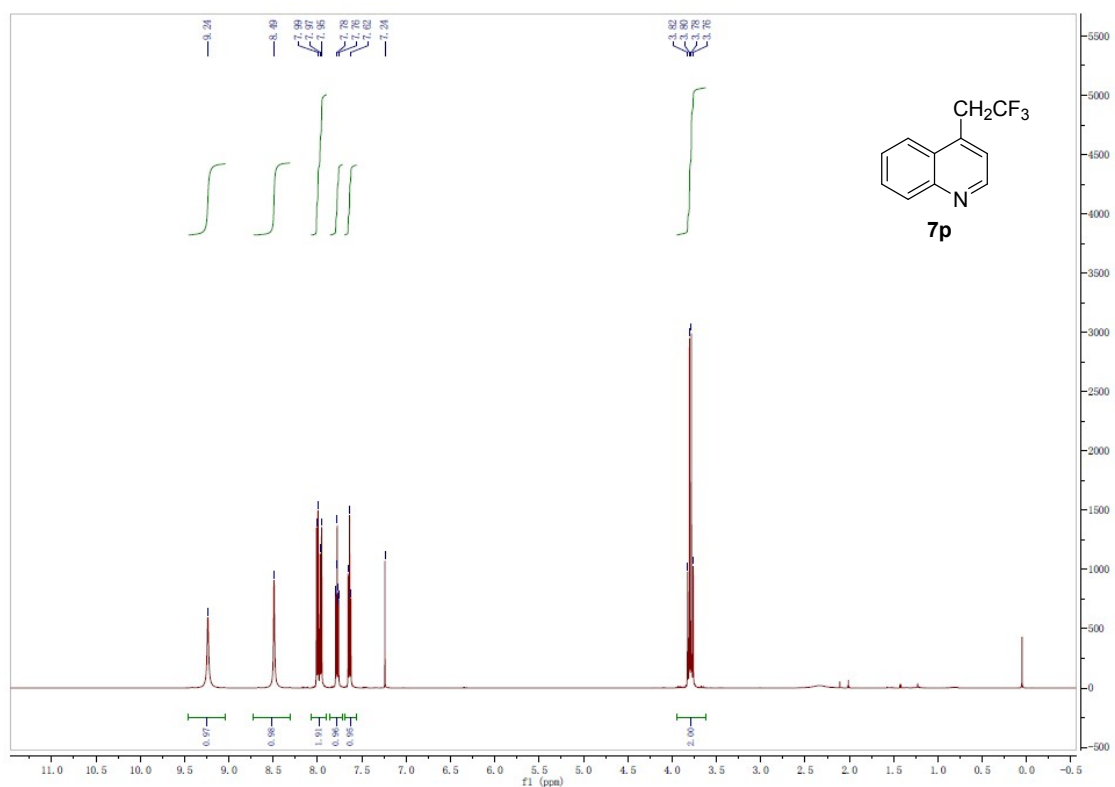

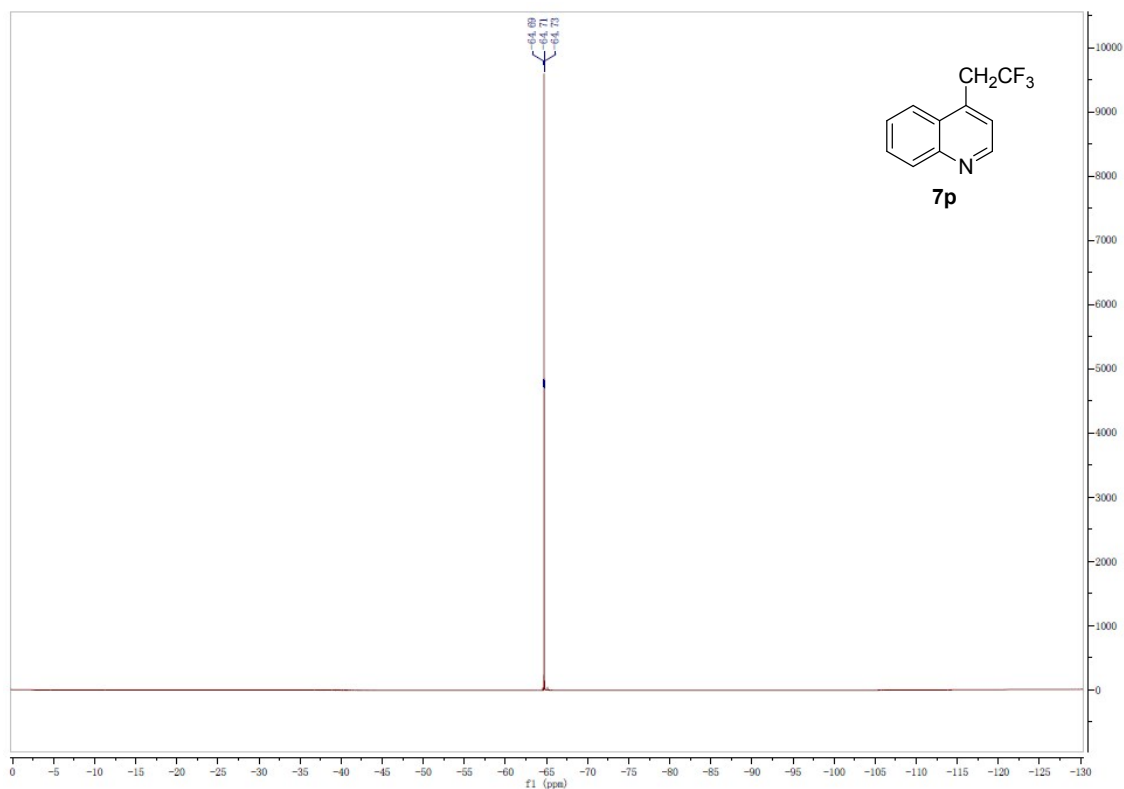

Figure S51. <sup>19</sup>F NMR of 7p in CDCl<sub>3</sub>

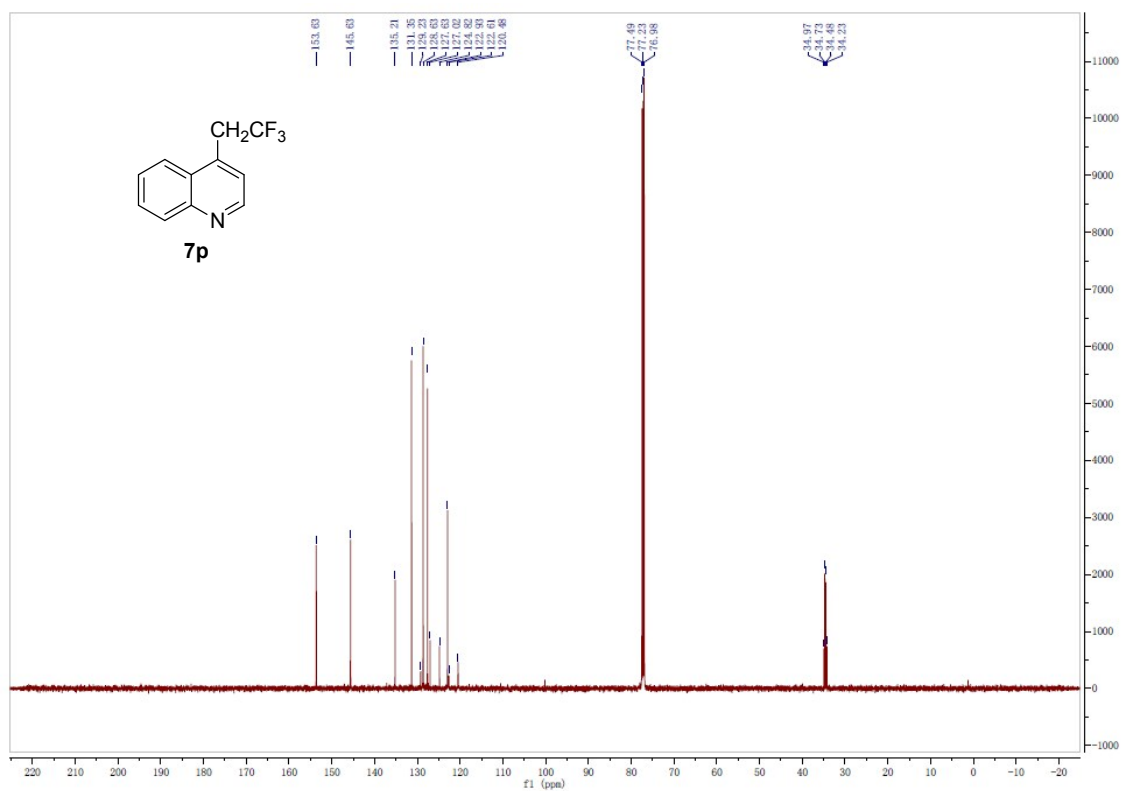

Figure S52. <sup>13</sup>C NMR of 7p in CDCl<sub>3</sub>

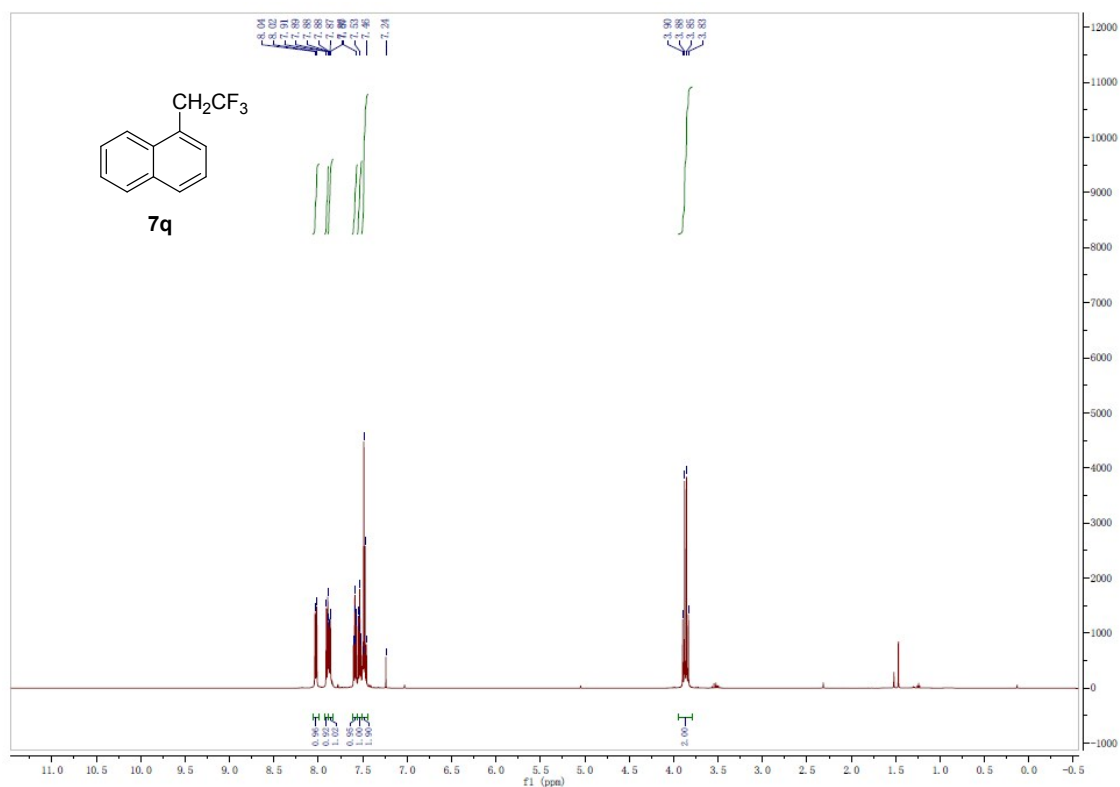

**Figure S53. <sup>1</sup>H NMR of 7q in CDCl<sub>3</sub>**

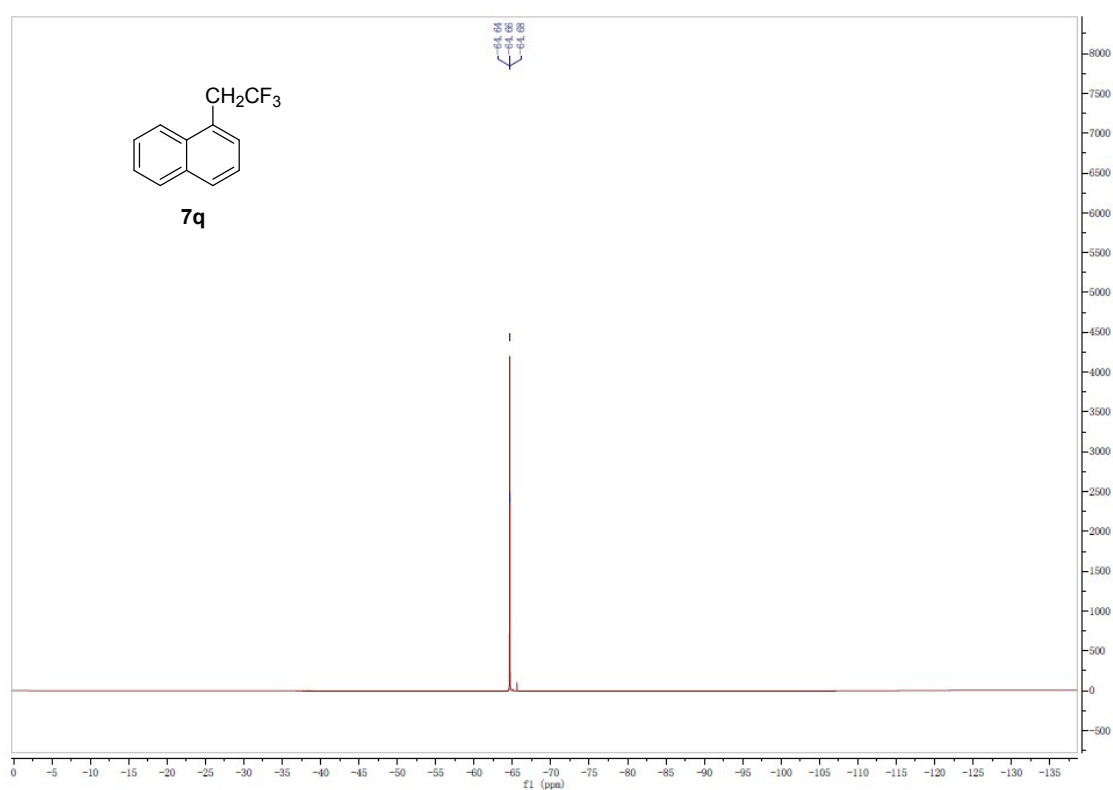

**Figure S54. <sup>19</sup>F NMR of 7q in CDCl<sub>3</sub>**

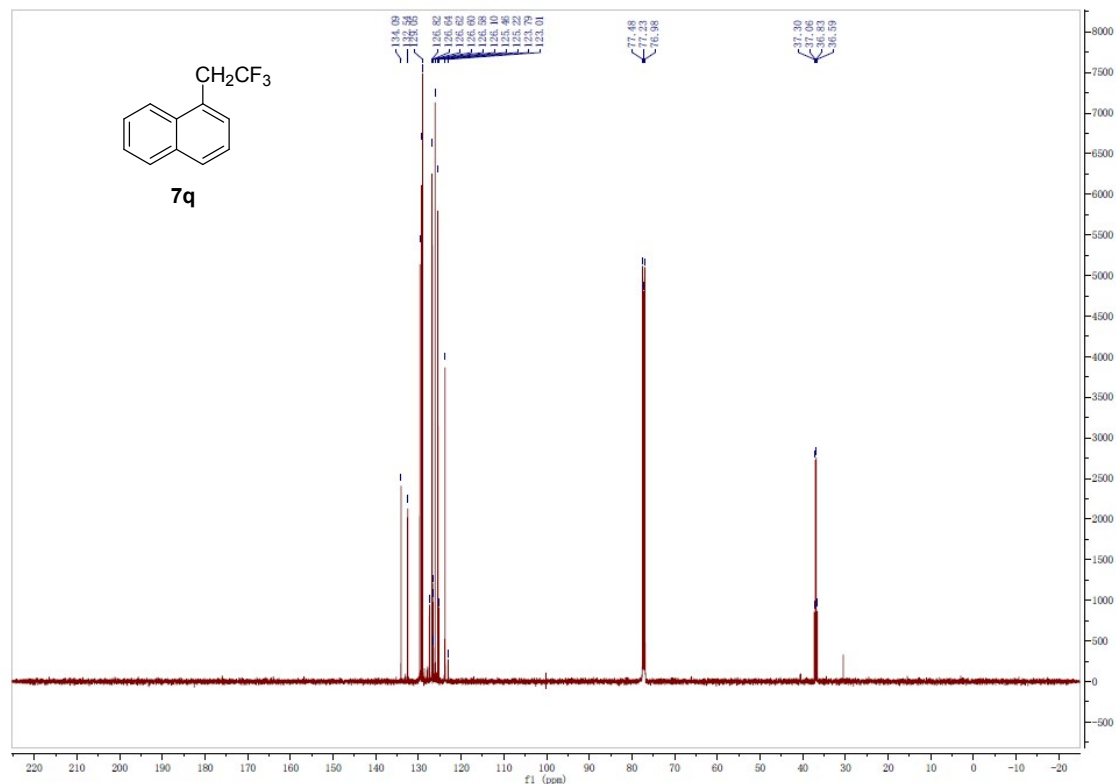

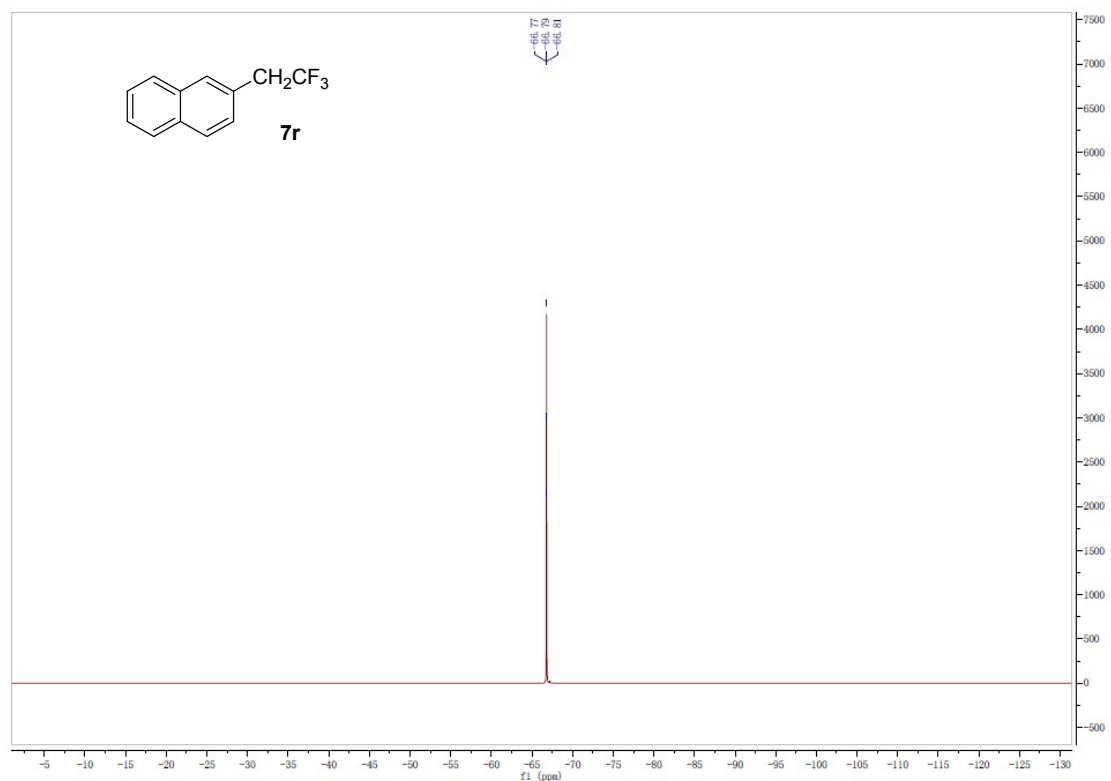

Figure S57. <sup>19</sup>F NMR of **7r** in CDCl<sub>3</sub>

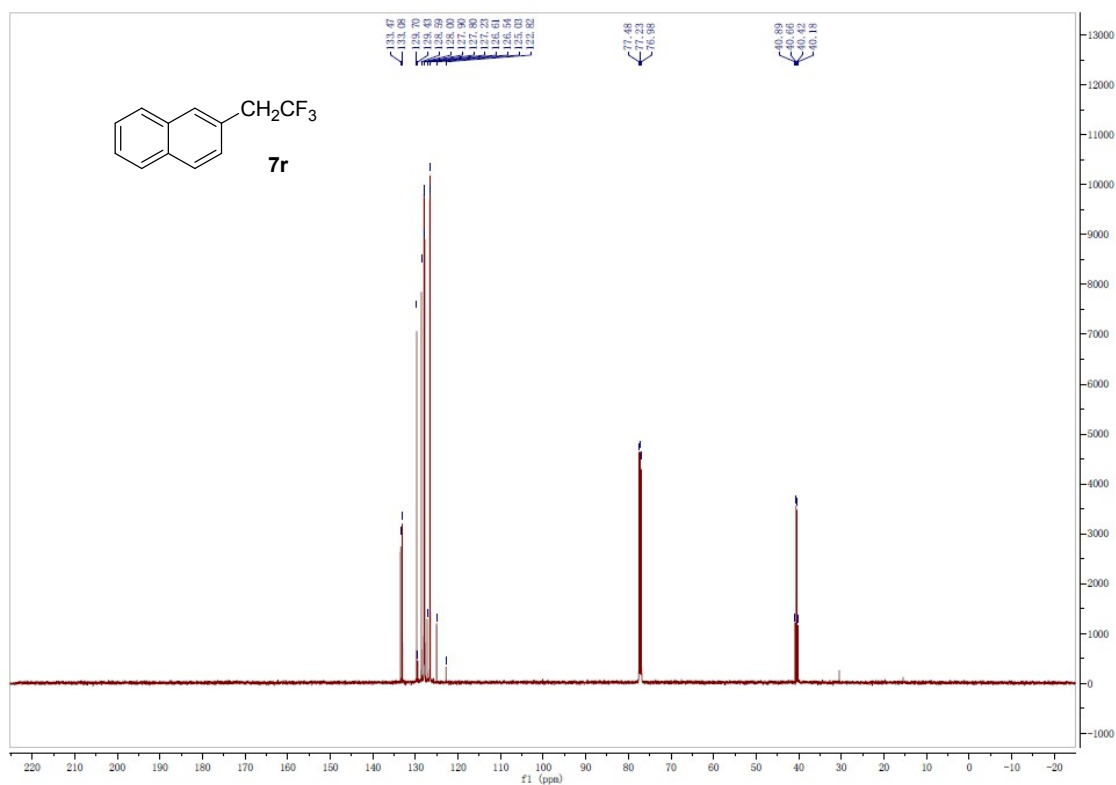

Figure S58. <sup>13</sup>C NMR of **7r** in CDCl<sub>3</sub>

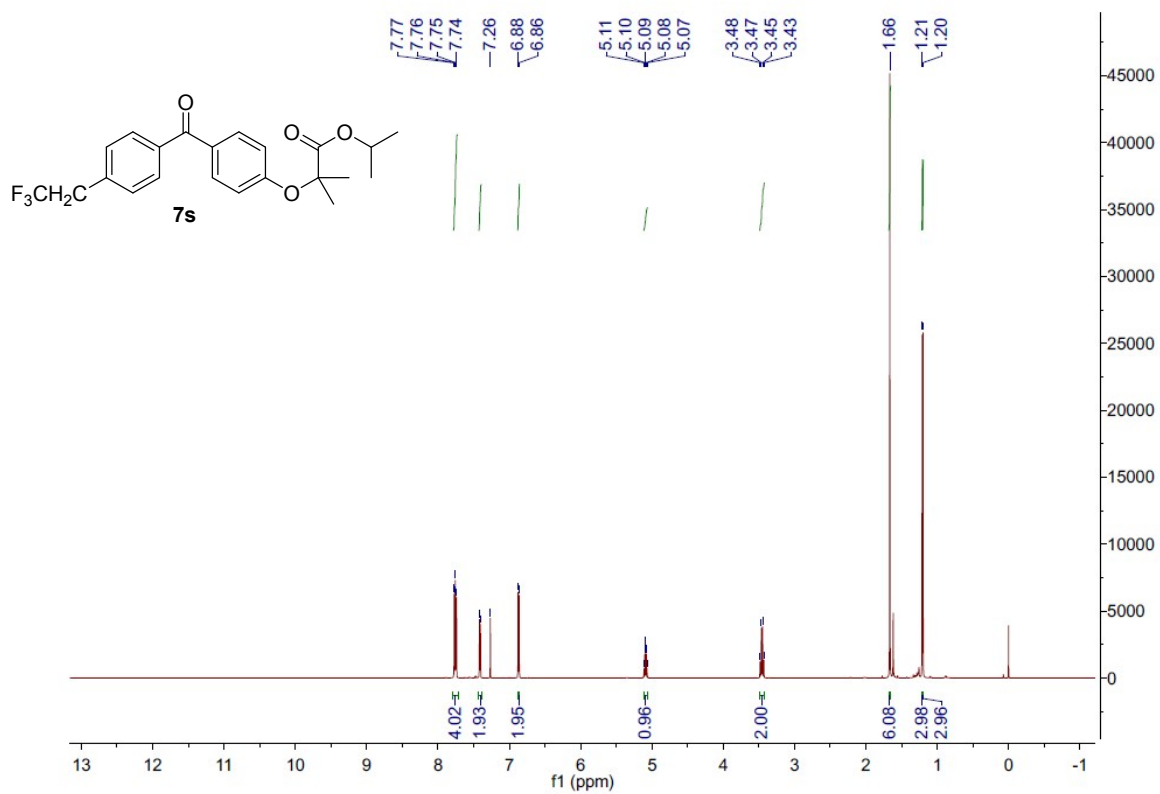

Figure S59. <sup>1</sup>H NMR of **7s** in CDCl<sub>3</sub>

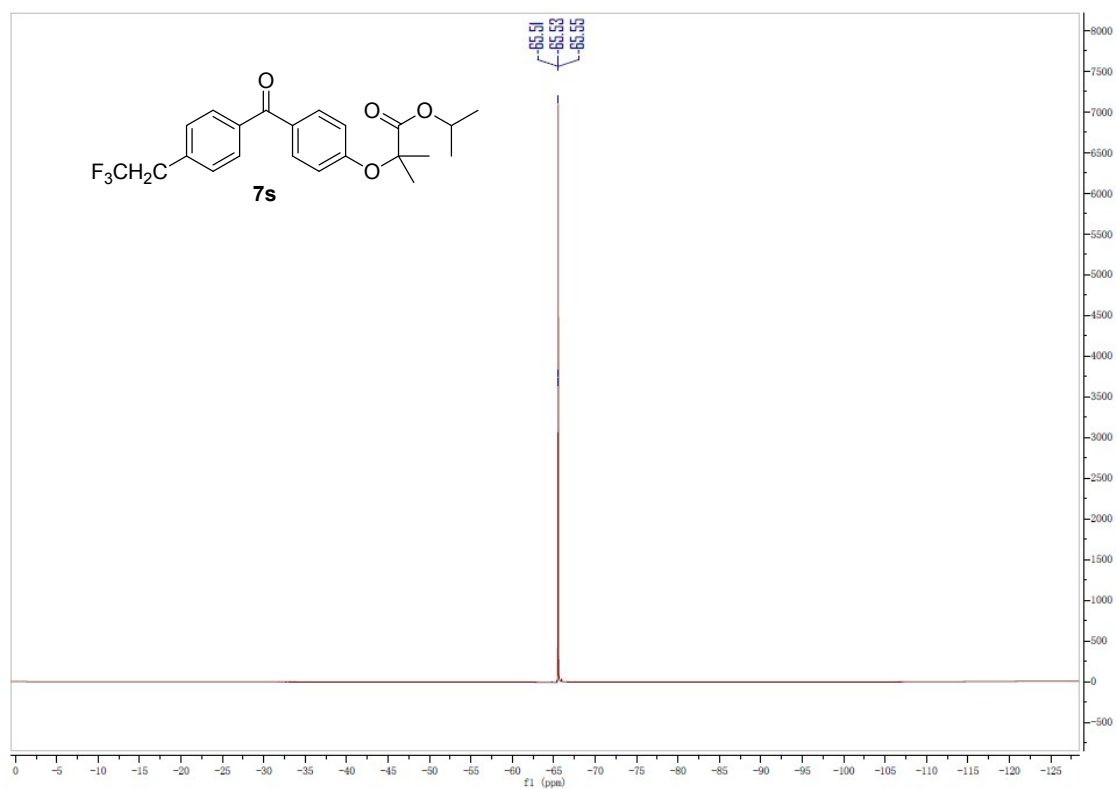

Figure S60. <sup>19</sup>F NMR of **7s** in CDCl<sub>3</sub>

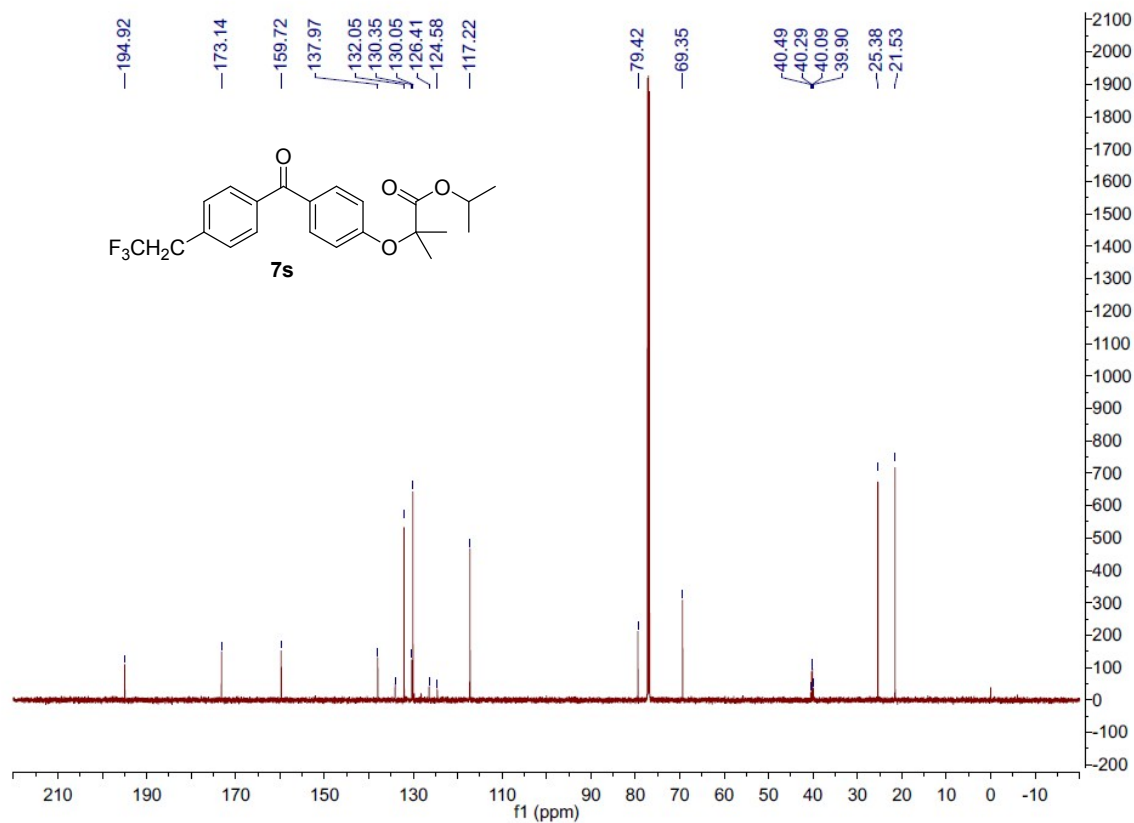

Figure S61. <sup>13</sup>C NMR of **7s** in CDCl<sub>3</sub>

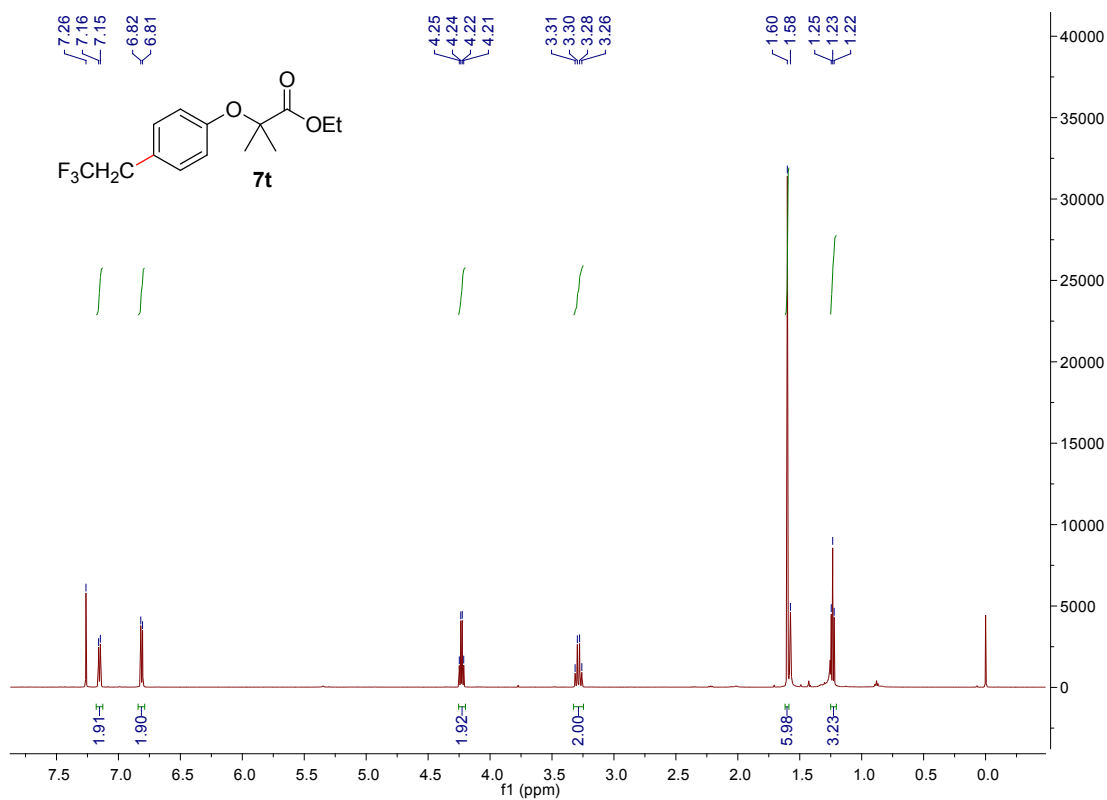

Figure S62. <sup>1</sup>H NMR of **7t** in CDCl<sub>3</sub>



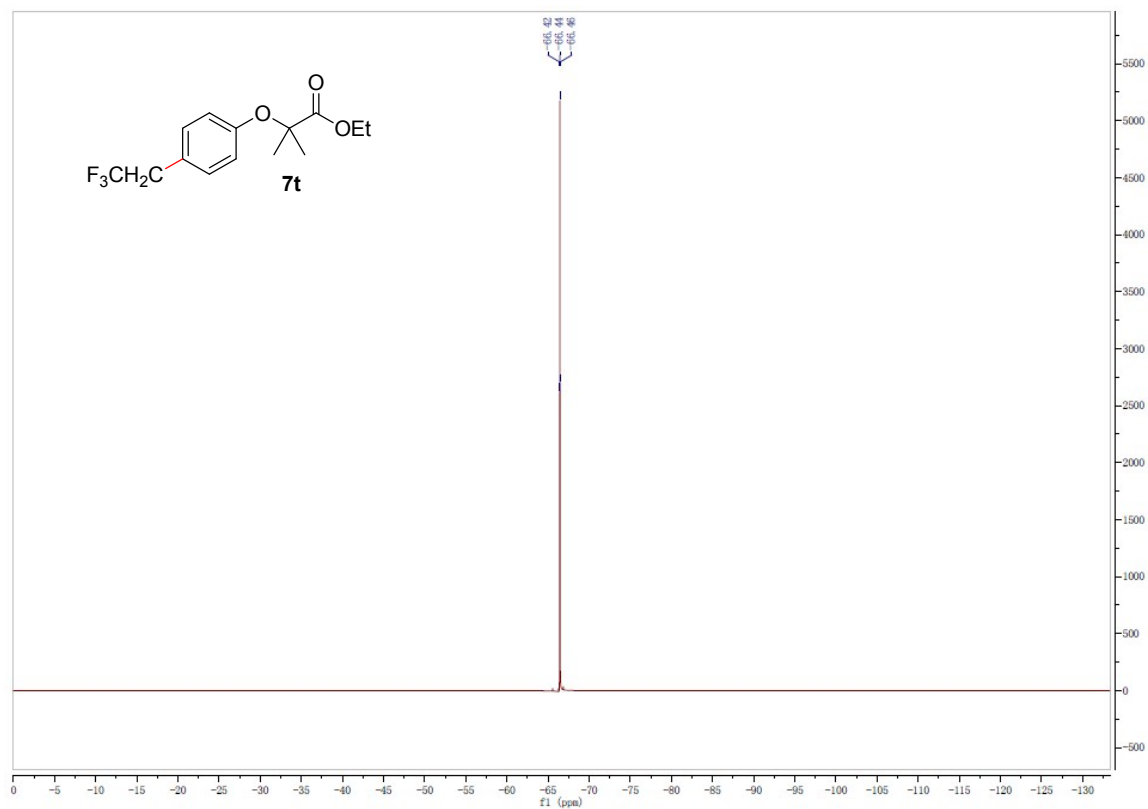

Figure S63. <sup>19</sup>F NMR of 7t in CDCl<sub>3</sub>

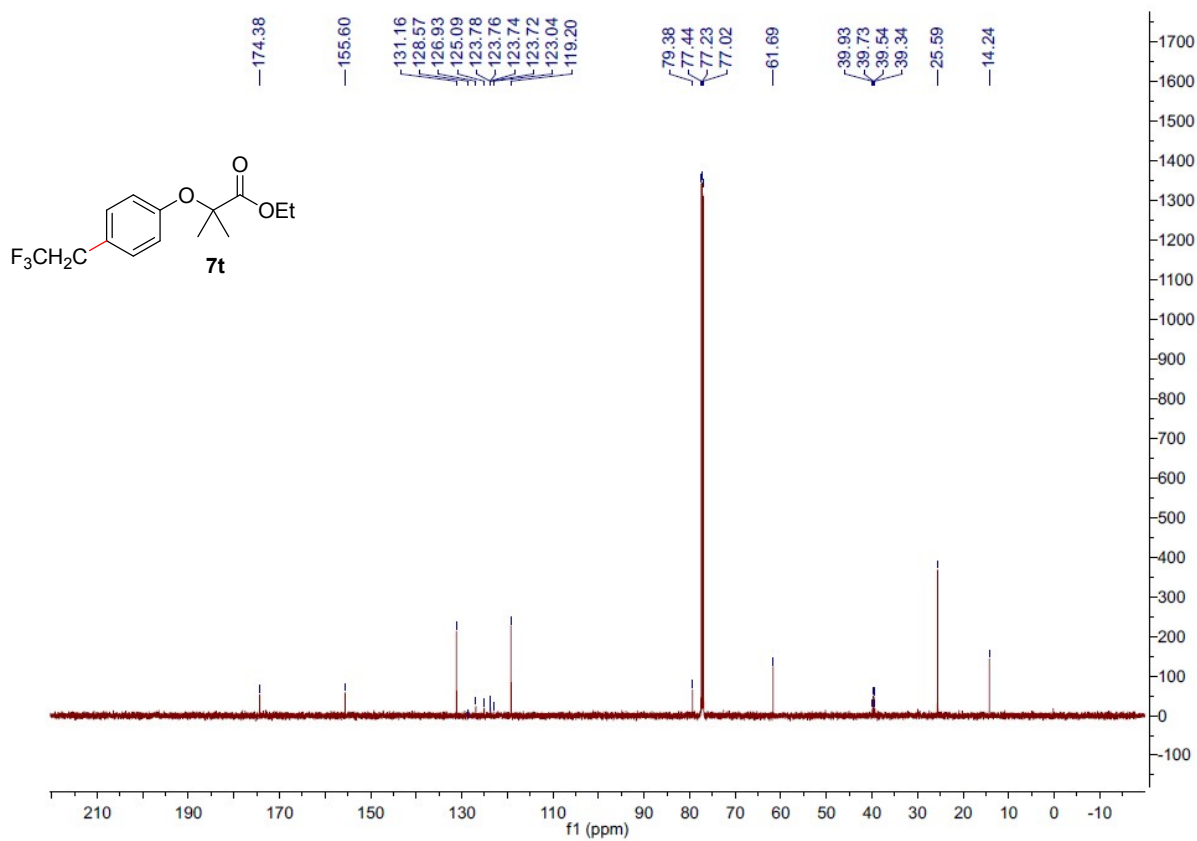

Figure S64. <sup>13</sup>C NMR of 7t in CDCl<sub>3</sub>

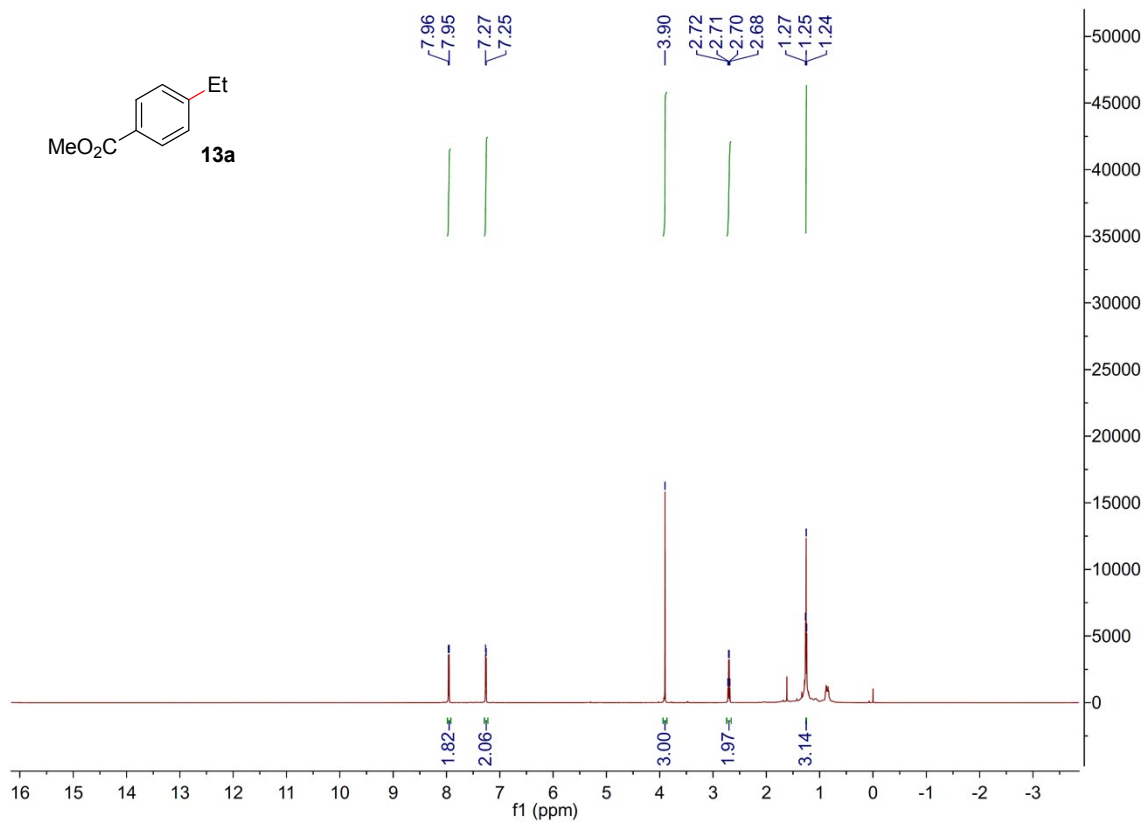

Figure S65. <sup>1</sup>H NMR of **13a** in CDCl<sub>3</sub>

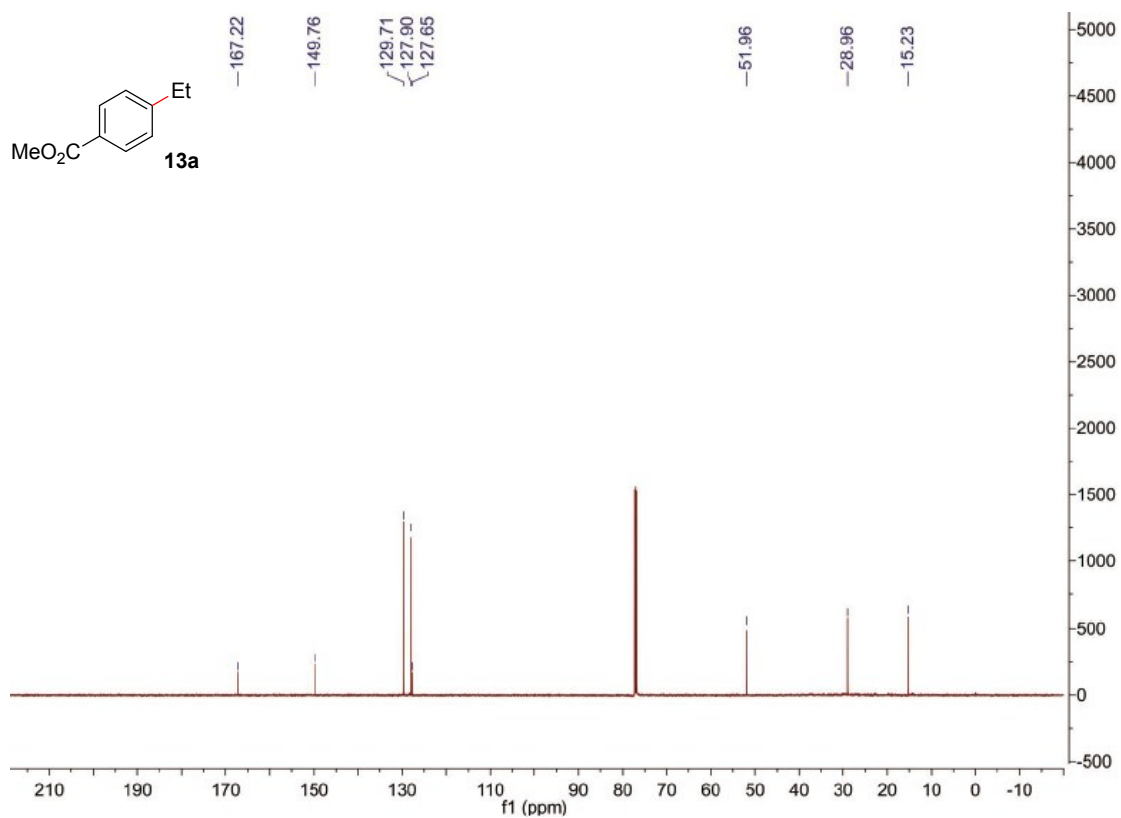

Figure S66. <sup>13</sup>C NMR of **13a** in CDCl<sub>3</sub>

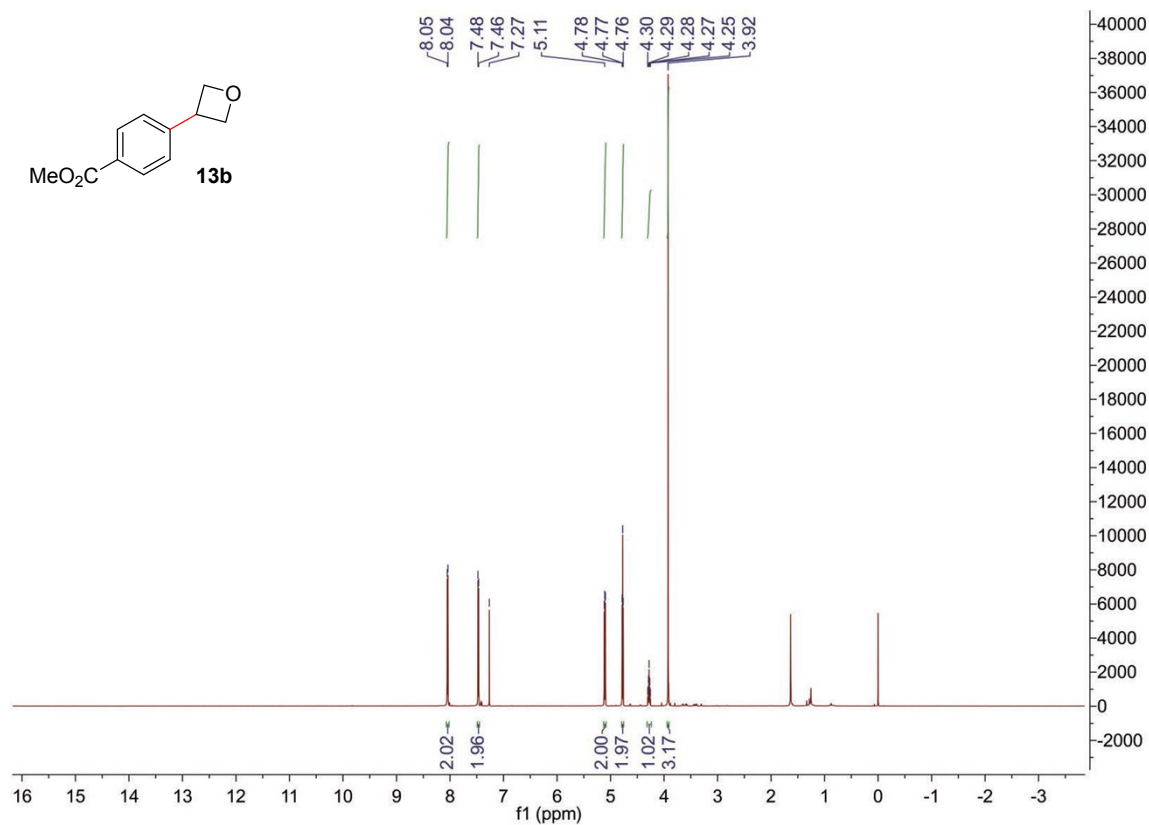

Figure S67. <sup>1</sup>H NMR of **13b** in CDCl<sub>3</sub>

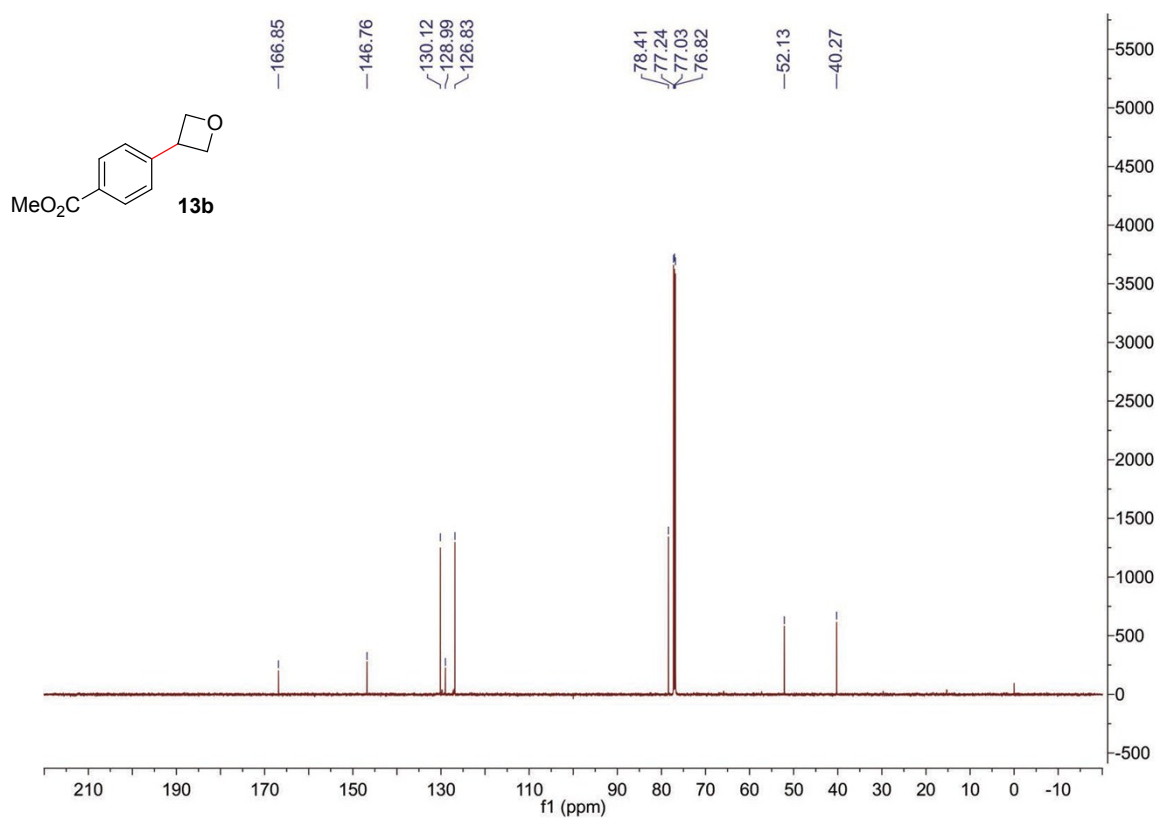

Figure S68. <sup>13</sup>C NMR of **13b** in CDCl<sub>3</sub>

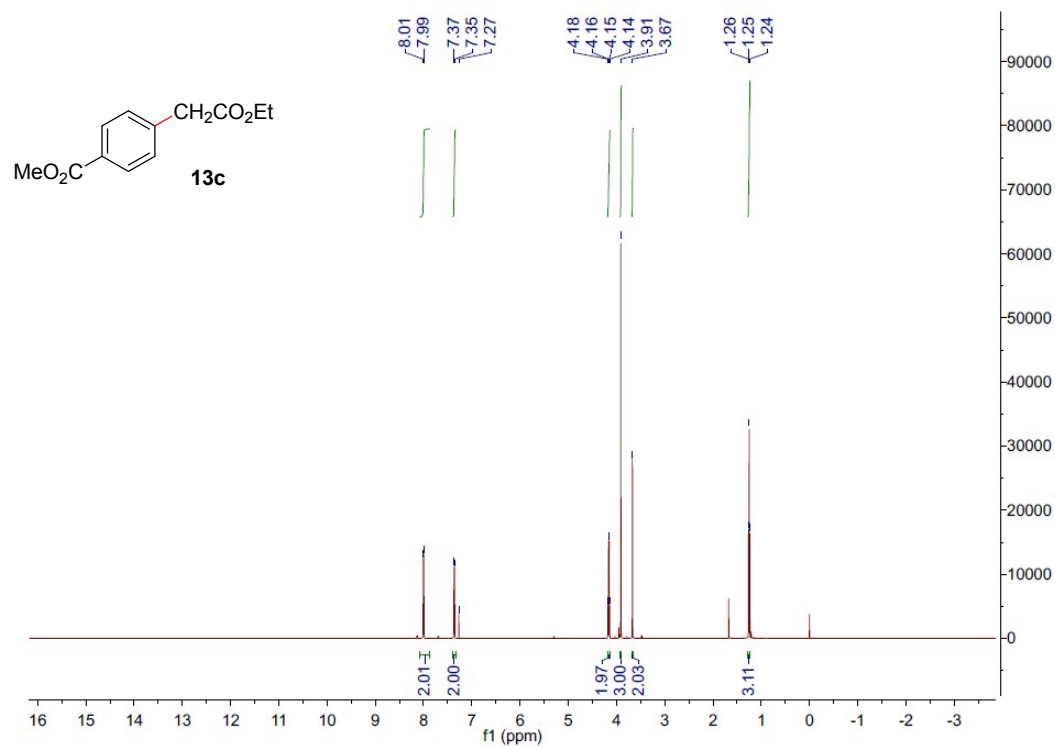

Figure S69. <sup>1</sup>H NMR of **13c** in CDCl<sub>3</sub>

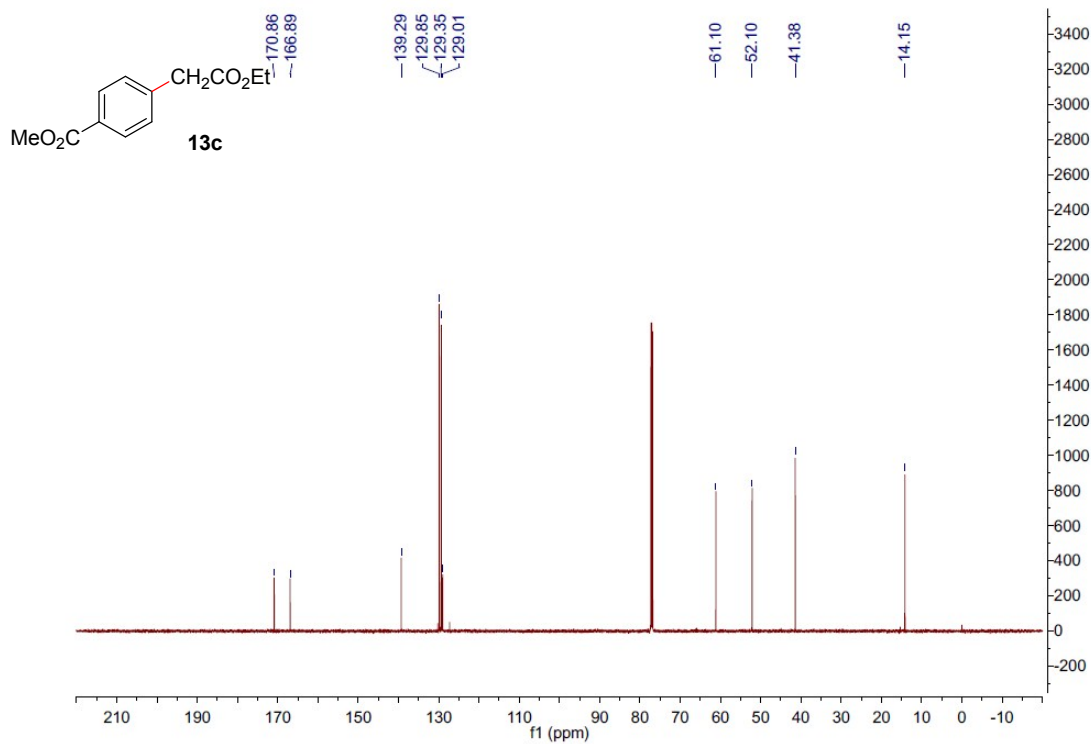

Figure S70. <sup>13</sup>C NMR of **13c** in CDCl<sub>3</sub>

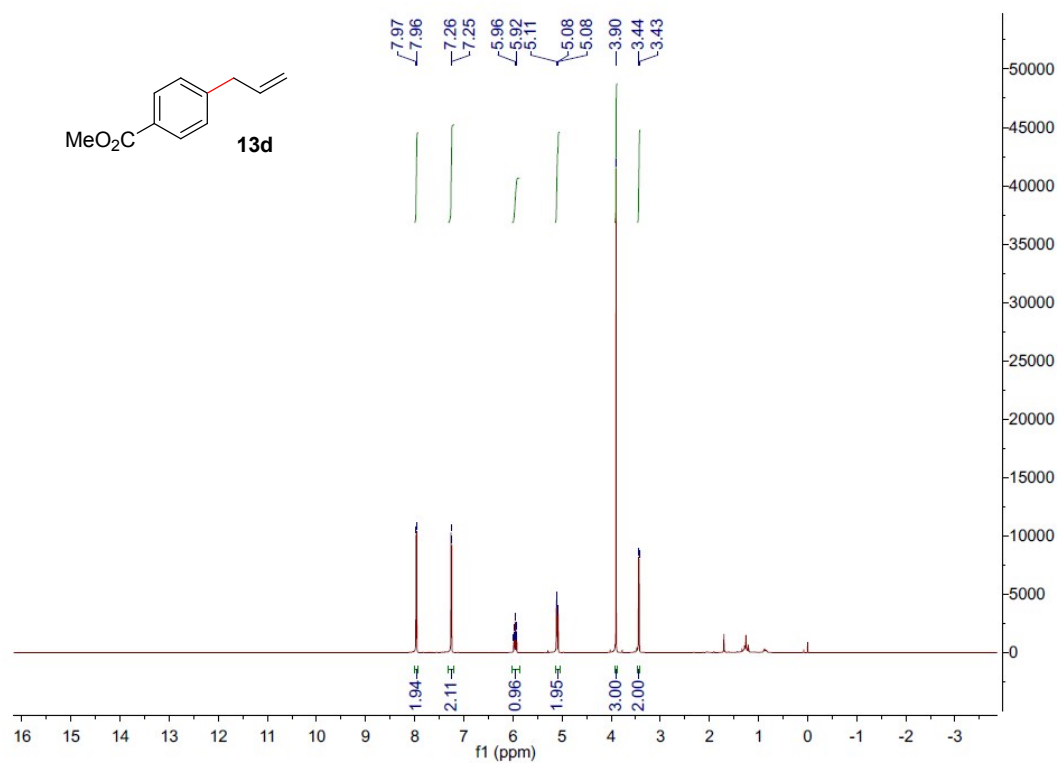

Figure S71. <sup>1</sup>H NMR of **13d** in CDCl<sub>3</sub>

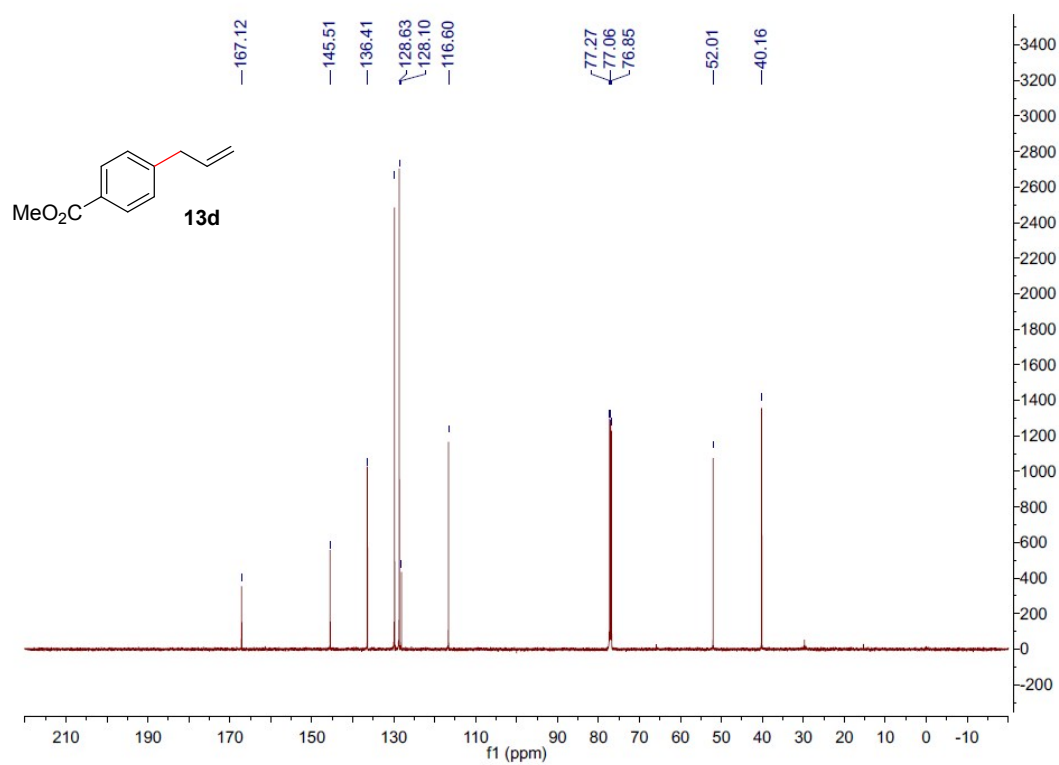

Figure S72. <sup>13</sup>C NMR of **13d** in CDCl<sub>3</sub>

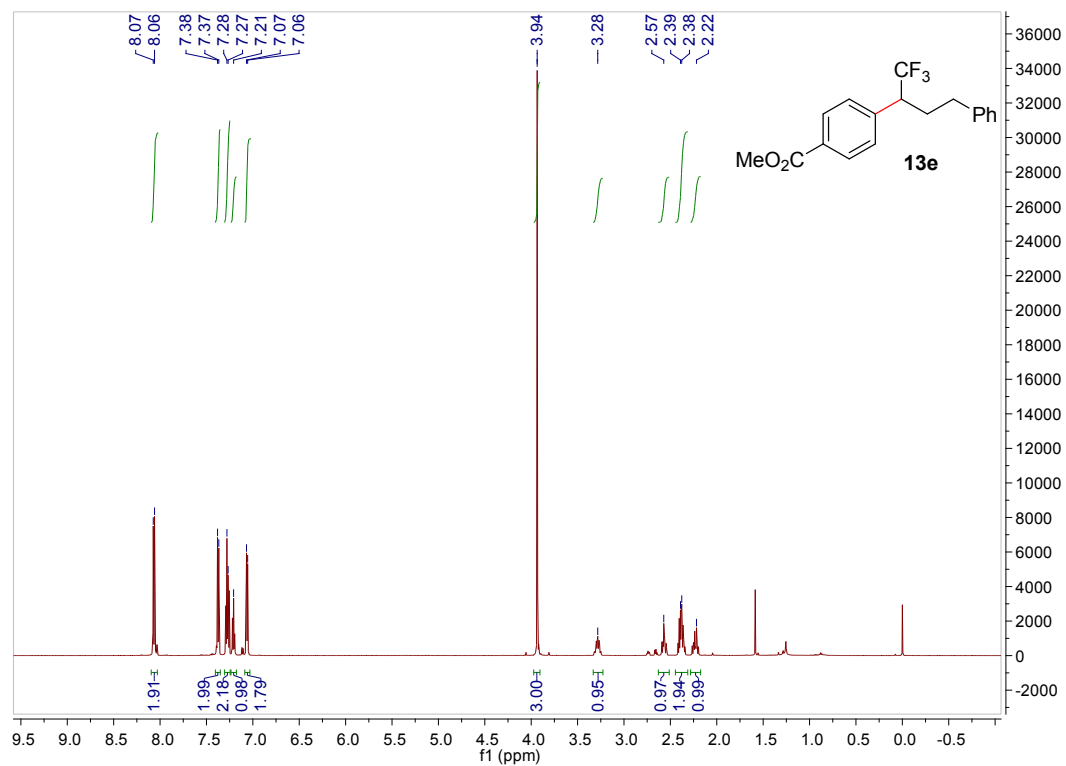

Figure S73.  $^1\text{H}$  NMR of **13e** in  $\text{CDCl}_3$

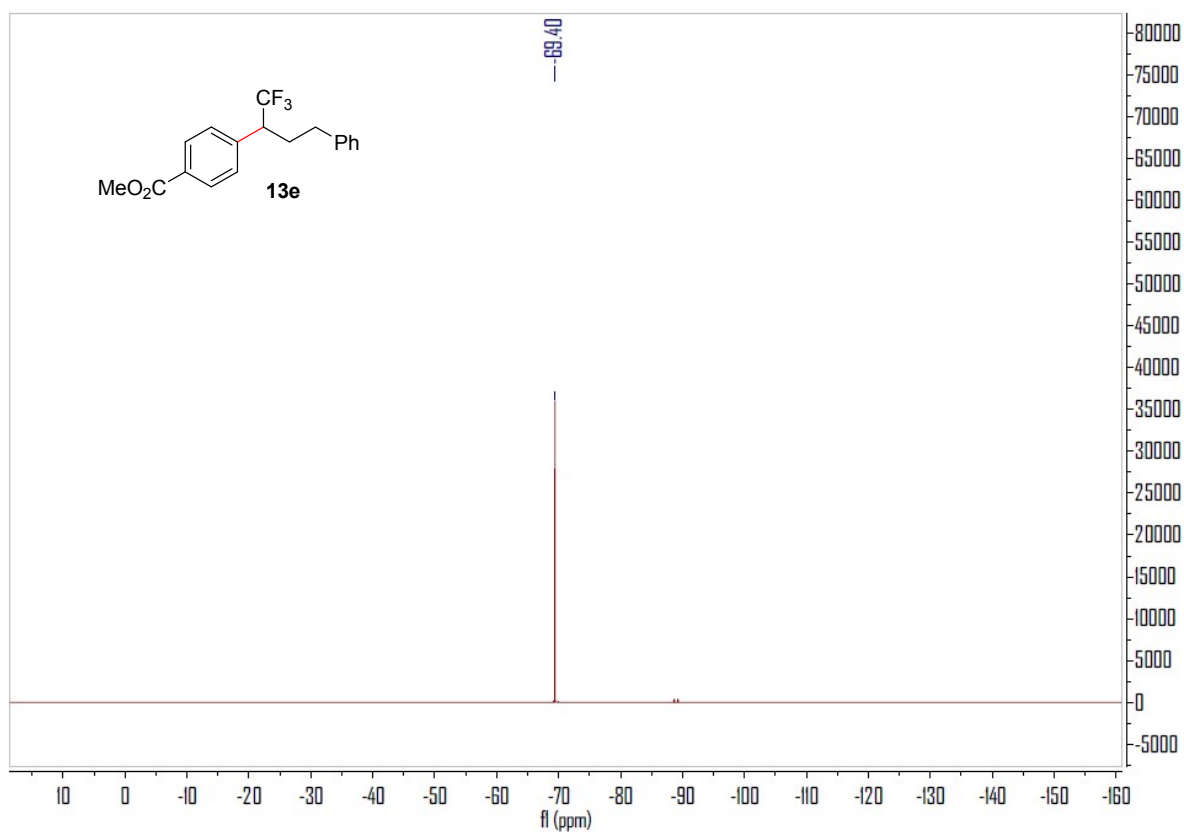

Figure S74.  $^{19}\text{F}$  NMR of **13e** in  $\text{CDCl}_3$

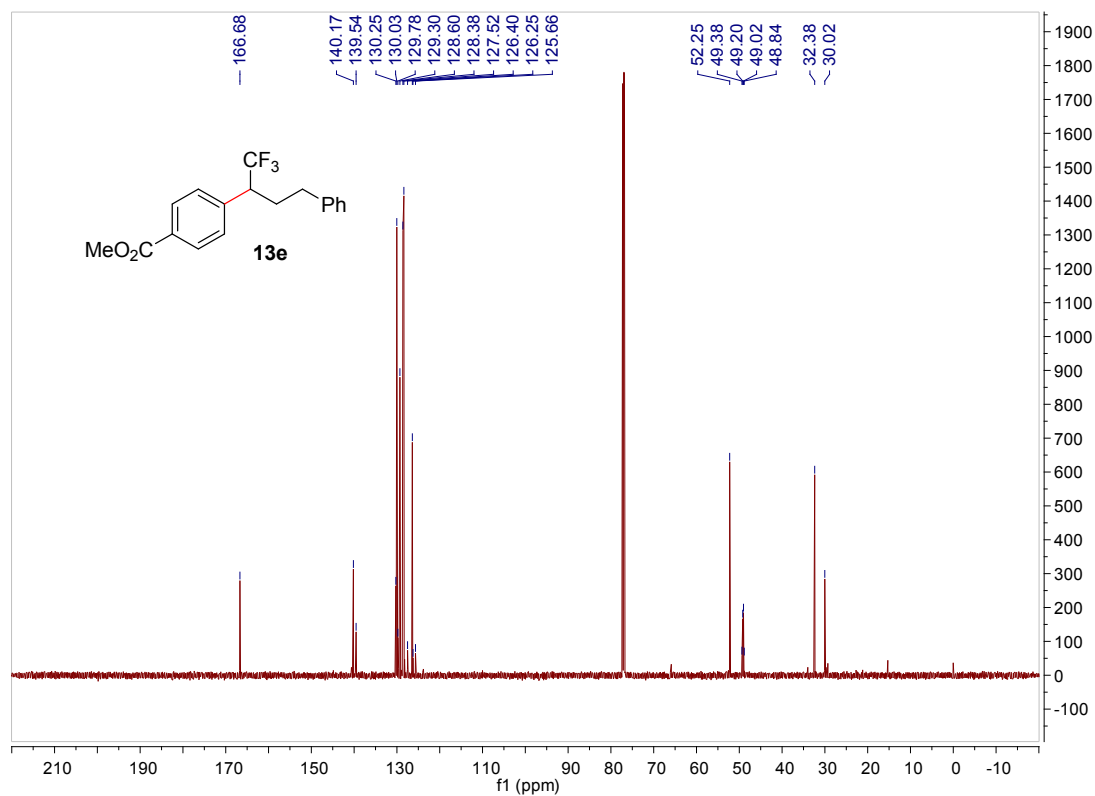

Figure S75. <sup>13</sup>C NMR of **13e** in CDCl<sub>3</sub>

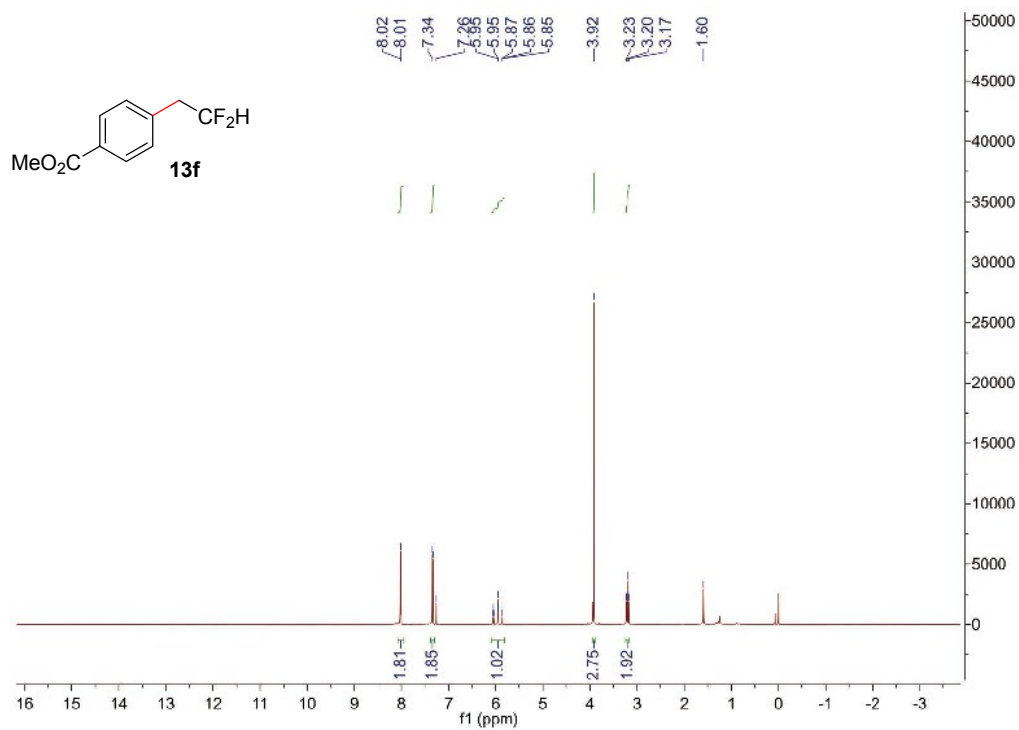

Figure S76. <sup>1</sup>H NMR of **13f** in CDCl<sub>3</sub>

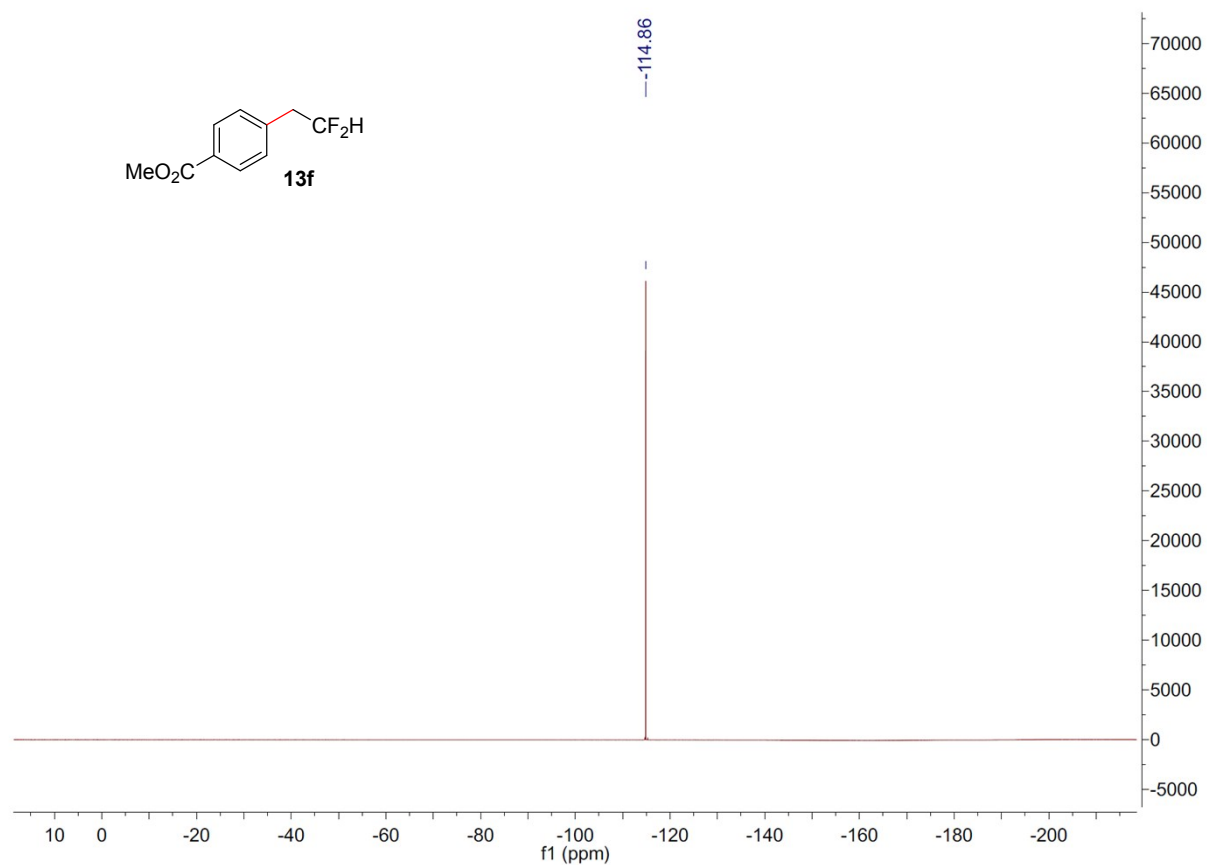

Figure S77. <sup>19</sup>F NMR of **13f** in CDCl<sub>3</sub>

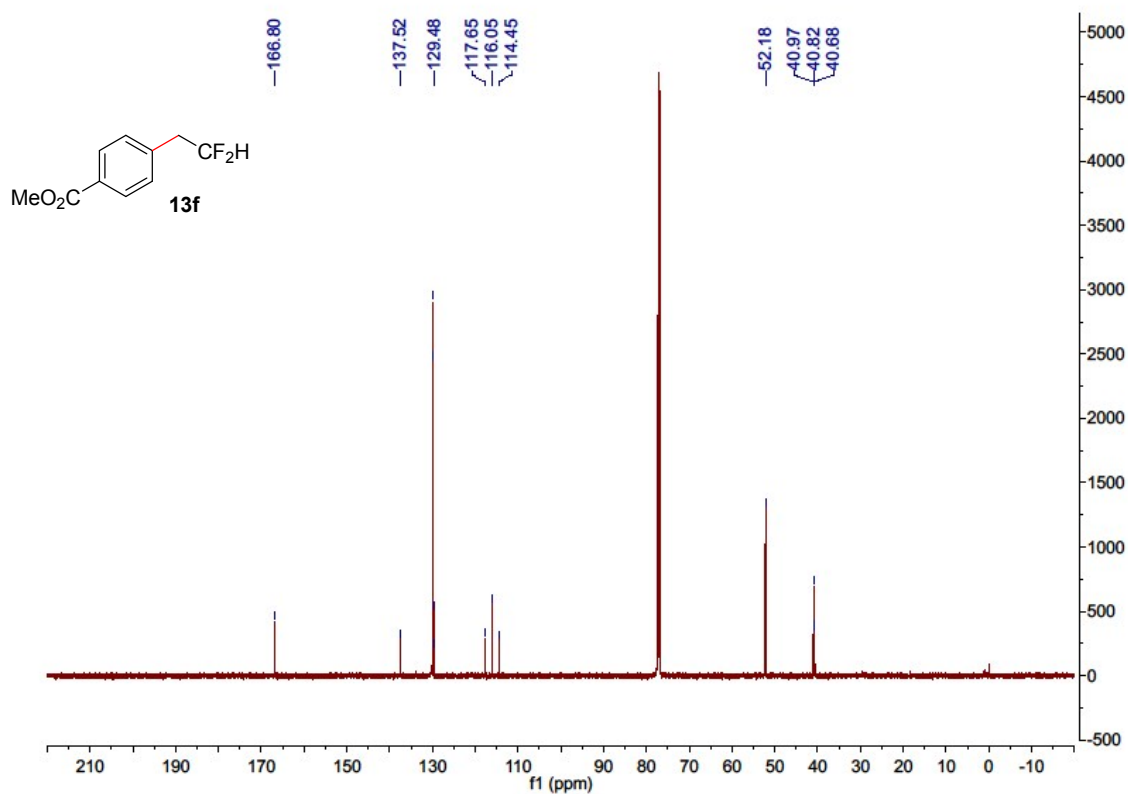

Figure S78. <sup>13</sup>C NMR of **13f** in CDCl<sub>3</sub>



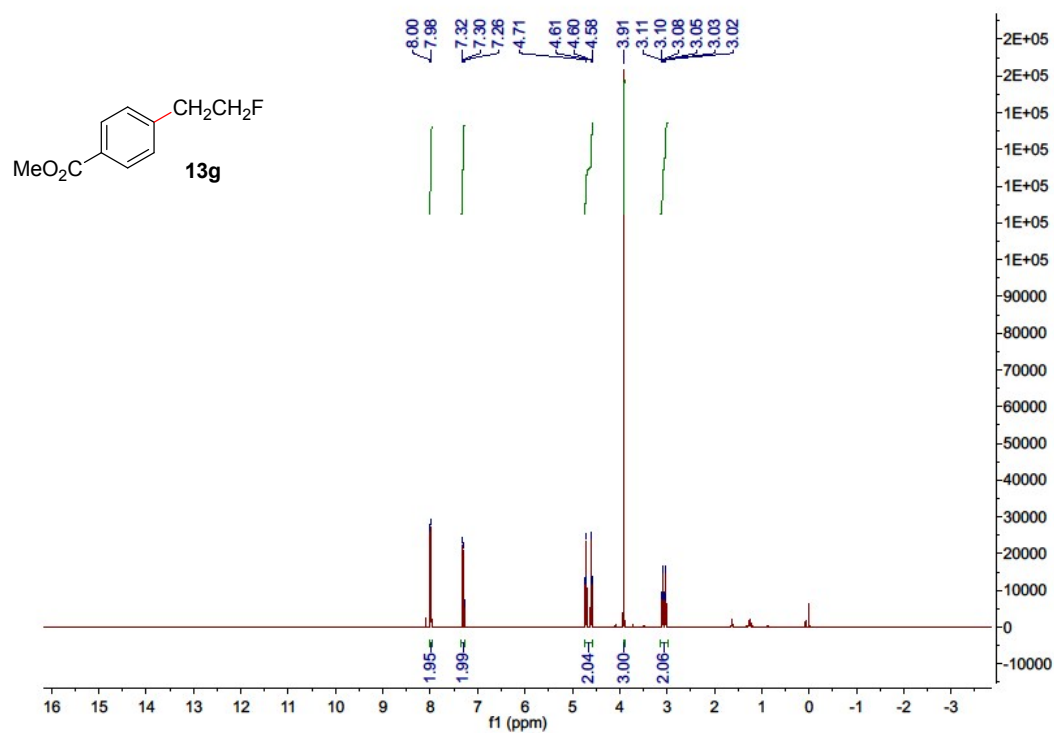

Figure S79. <sup>1</sup>H NMR spectra of **13g** in CDCl<sub>3</sub>

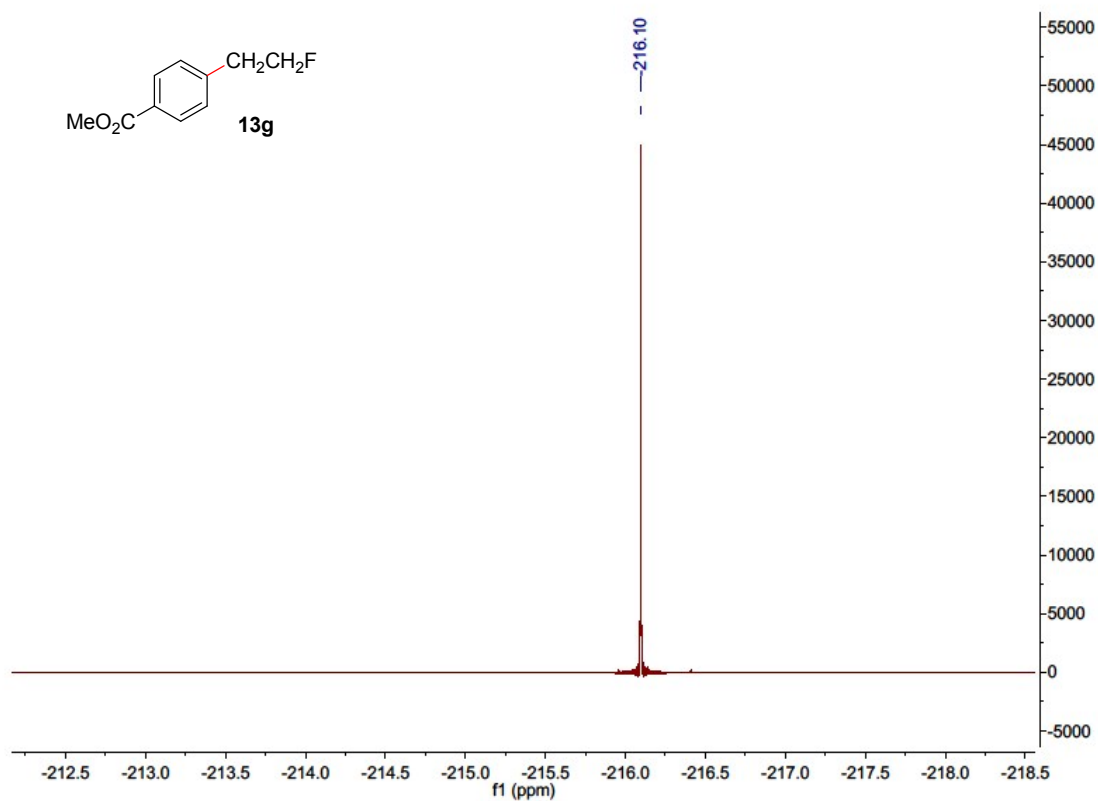

Figure S80. <sup>19</sup>F NMR spectra of **13g** in CDCl<sub>3</sub>

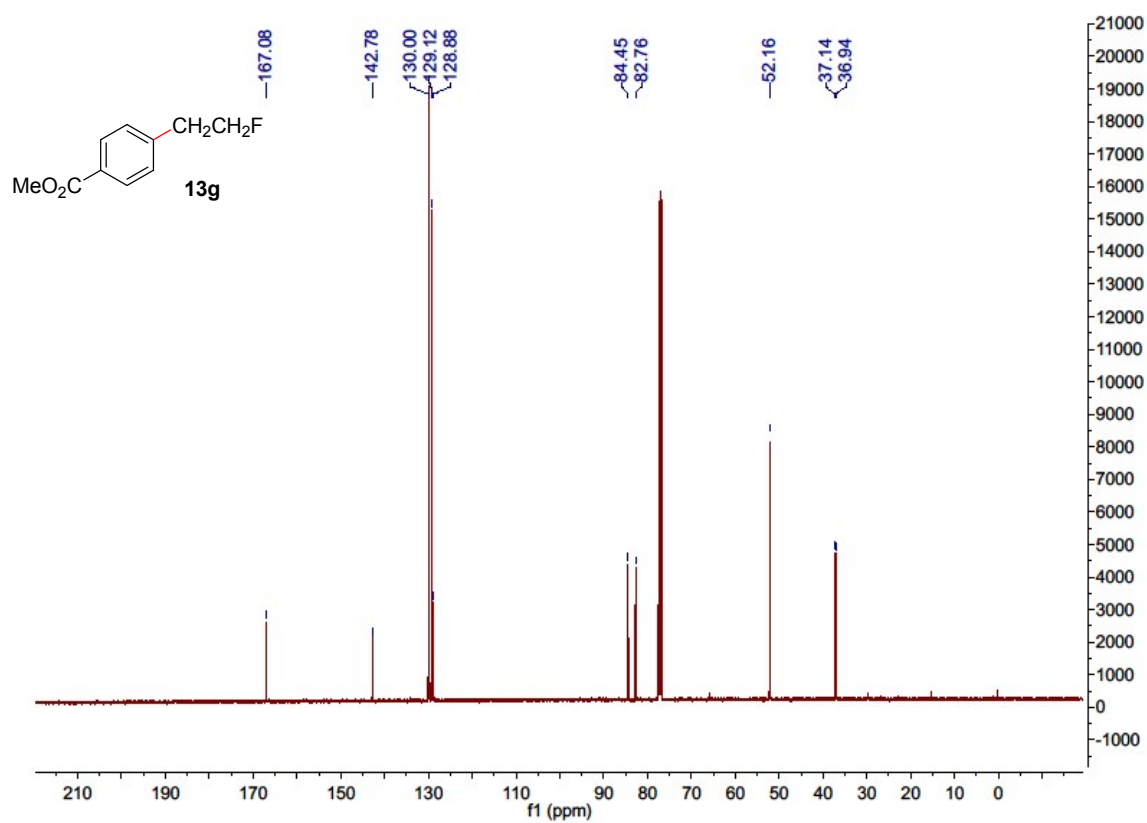

Figure S81. <sup>13</sup>C NMR spectra of **3g** in CDCl<sub>3</sub>

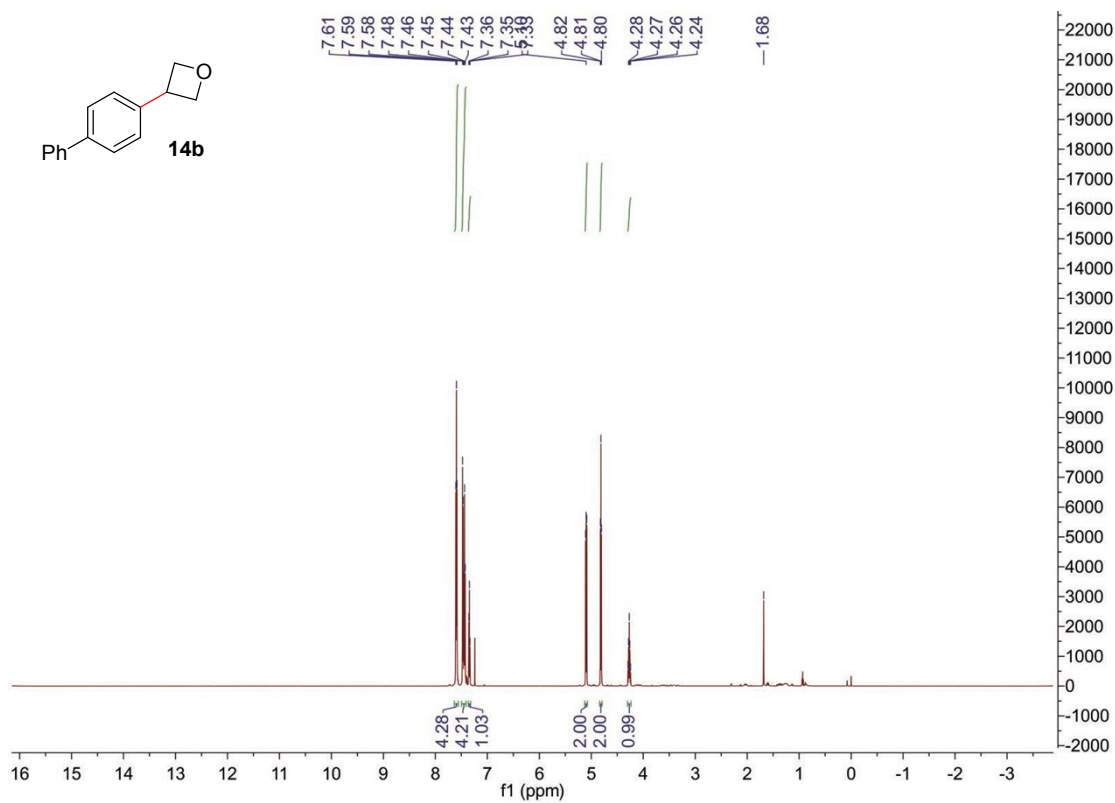

Figure S82. <sup>1</sup>H NMR of **14b** in CDCl<sub>3</sub>

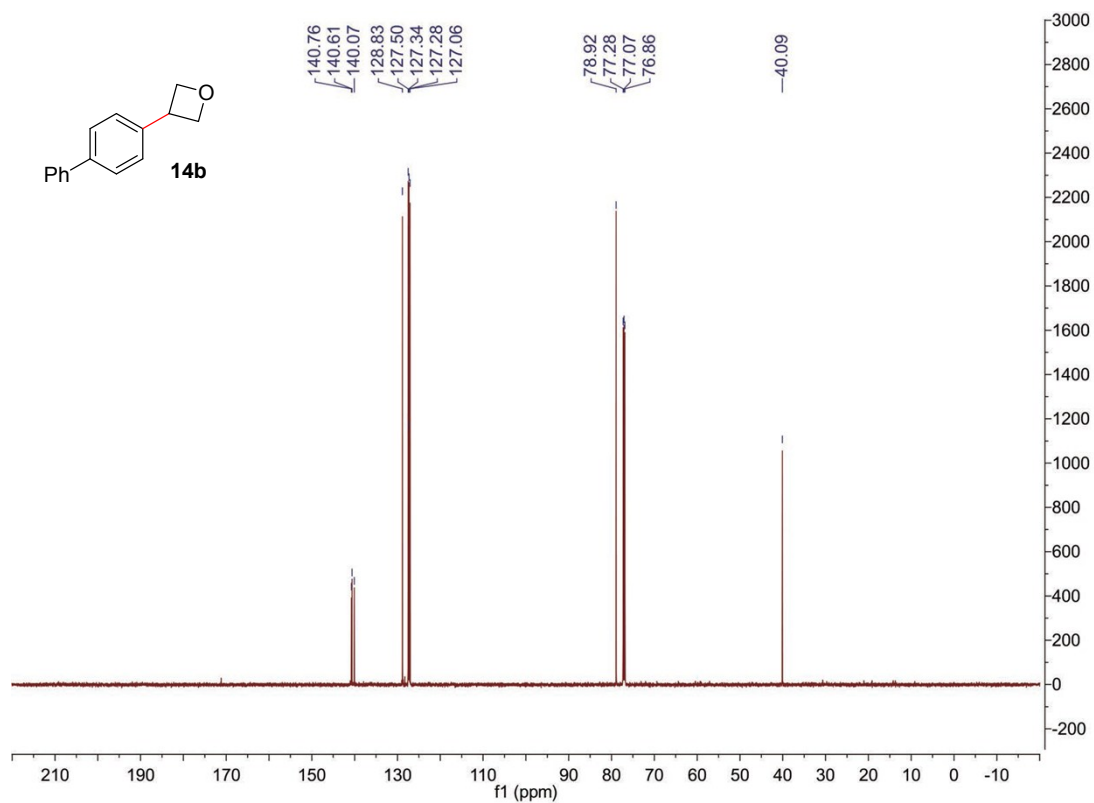

Figure S83. <sup>13</sup>C NMR of **14b** in CDCl<sub>3</sub>

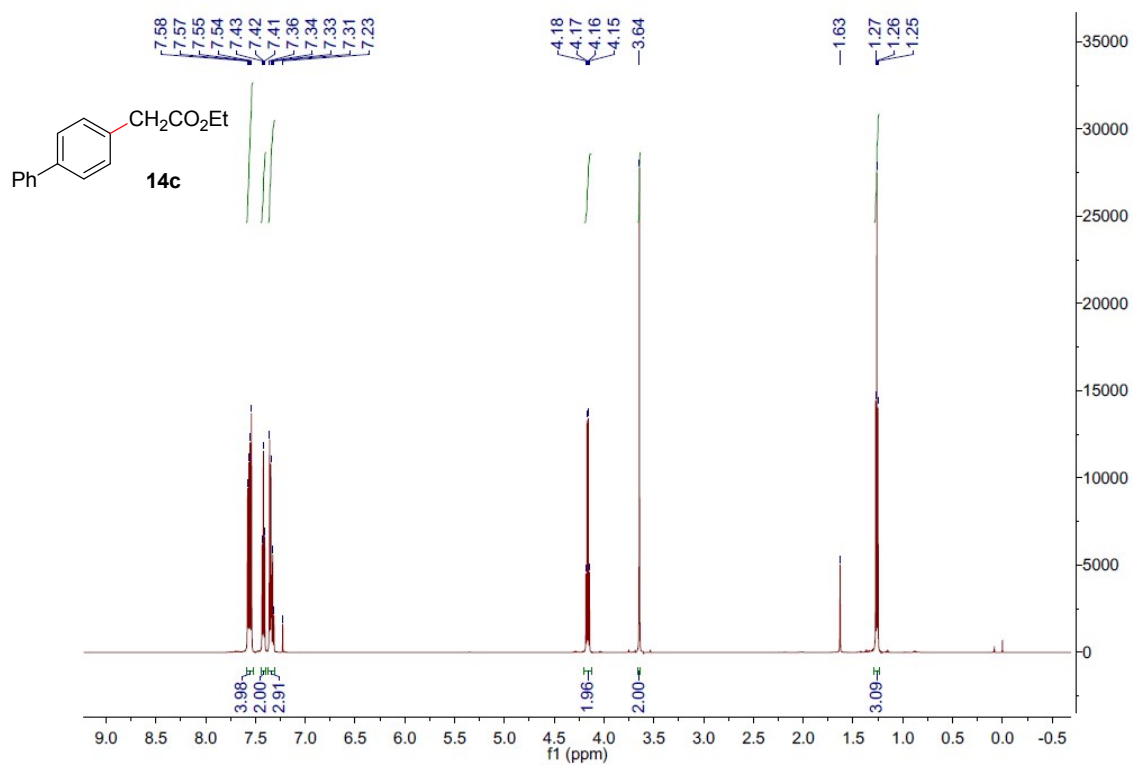

Figure S84. <sup>1</sup>H NMR of **14c** in CDCl<sub>3</sub>

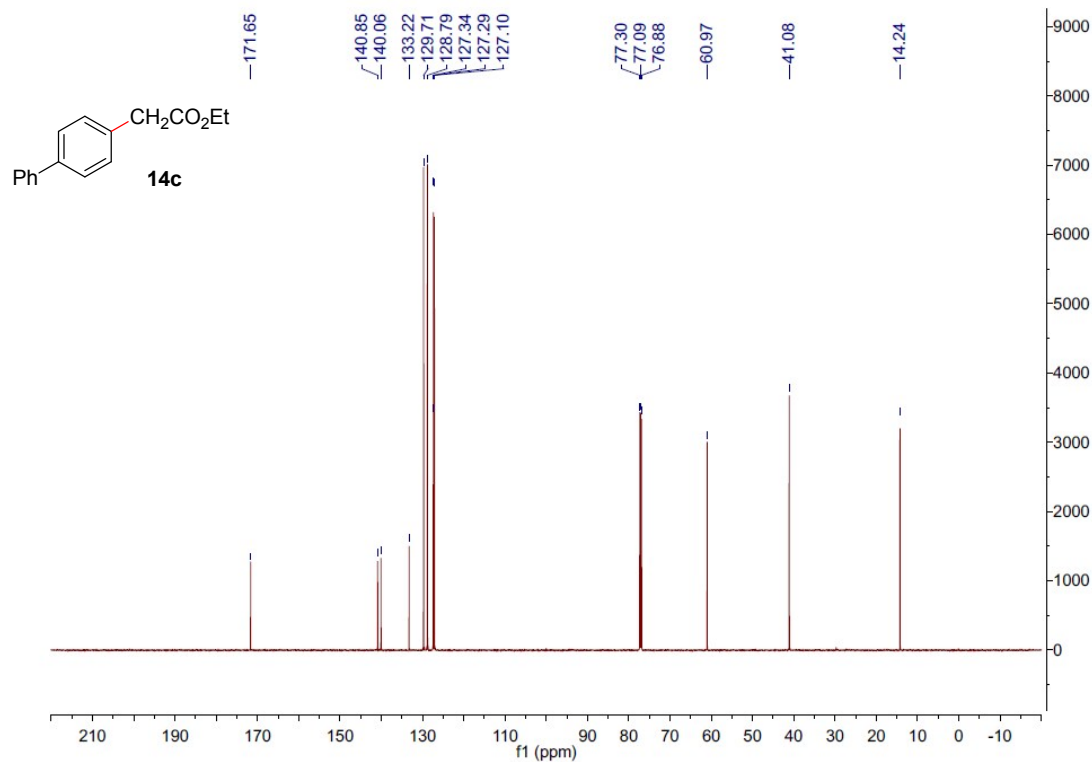

Figure S85. <sup>13</sup>C NMR of **14c** in CDCl<sub>3</sub>

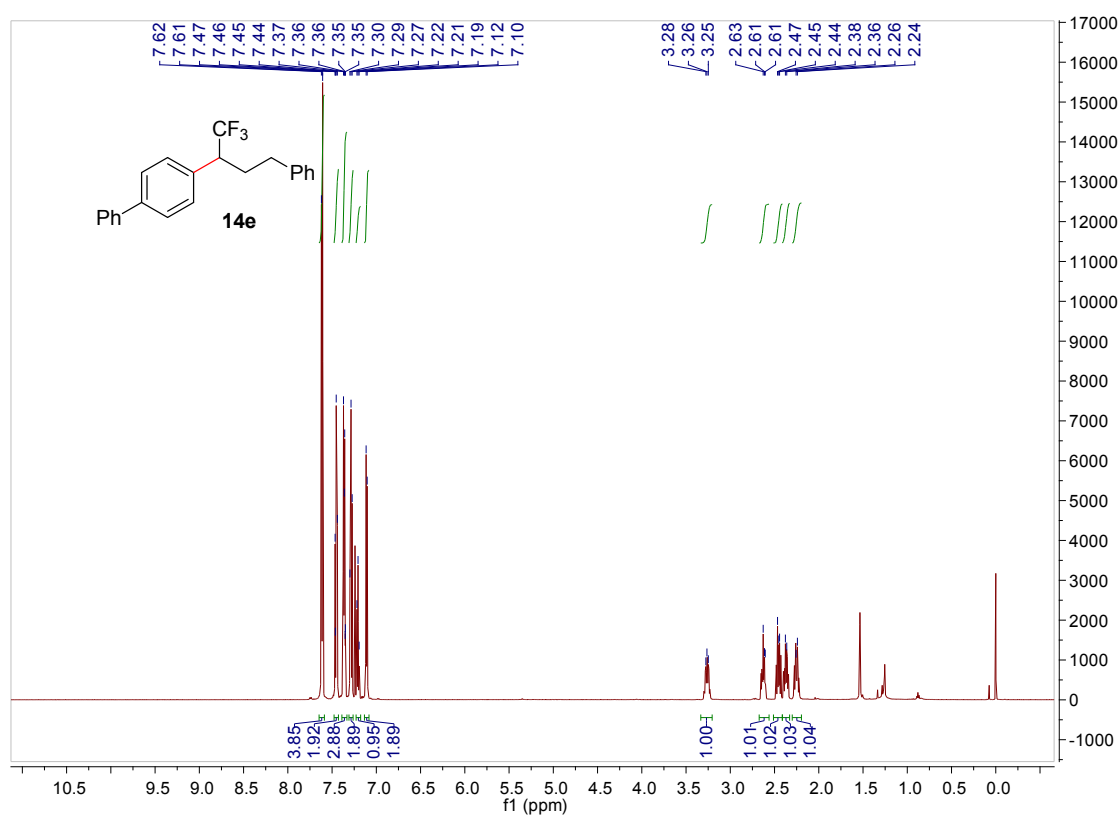

Figure S86. <sup>1</sup>H NMR of **14e** in CDCl<sub>3</sub>

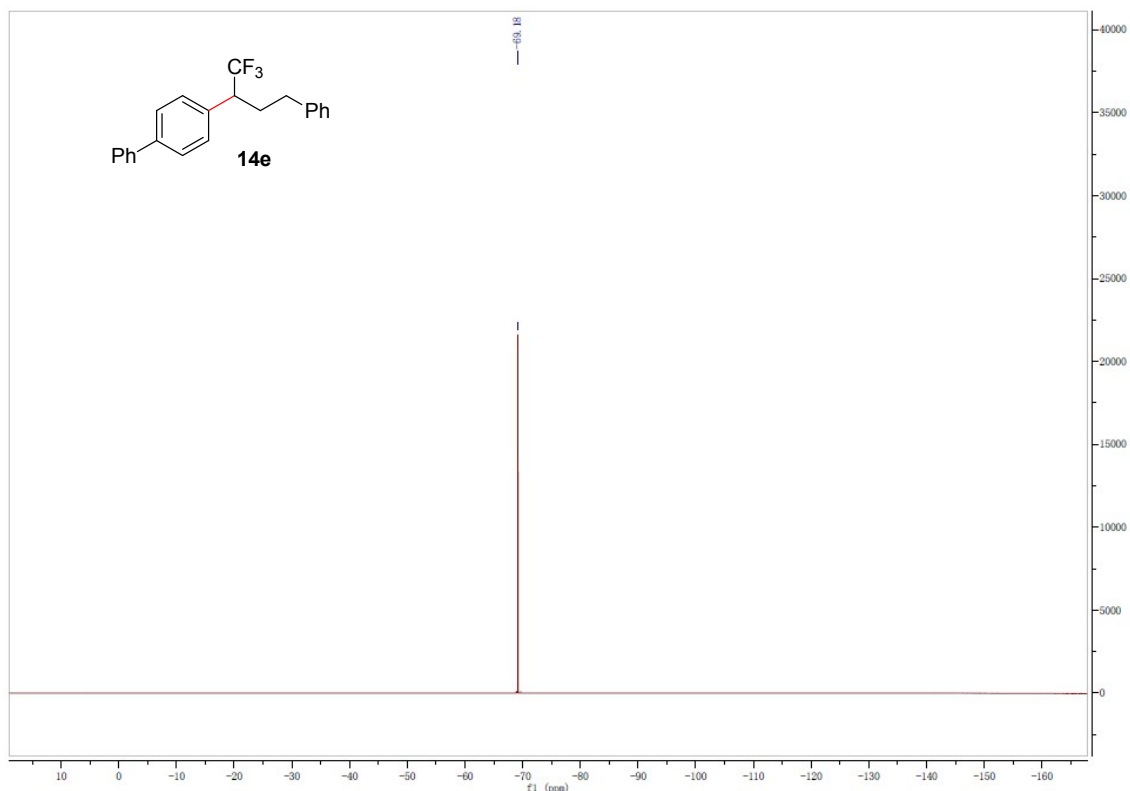

Figure S87. <sup>19</sup>F NMR of **14e** in CDCl<sub>3</sub>

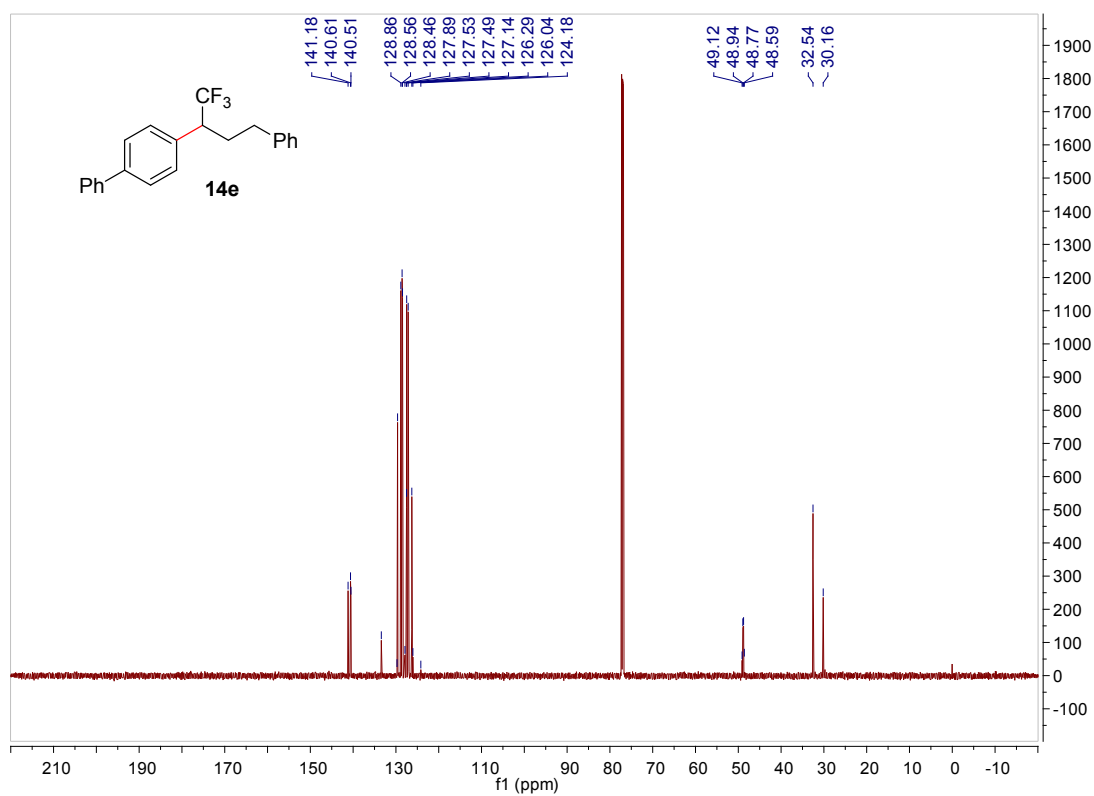

Figure S88. <sup>13</sup>C NMR of **14e** in CDCl<sub>3</sub>

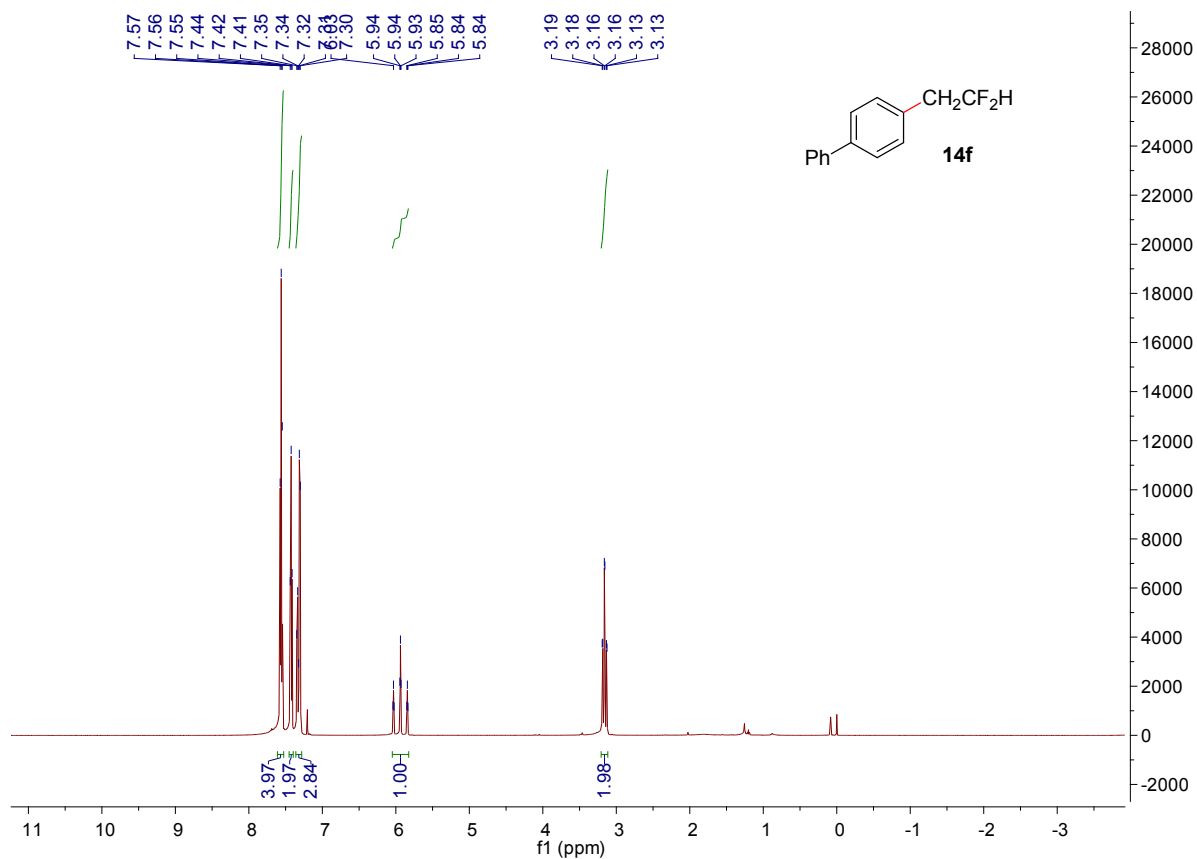

Figure S89. <sup>1</sup>H NMR of 14f in CDCl<sub>3</sub>

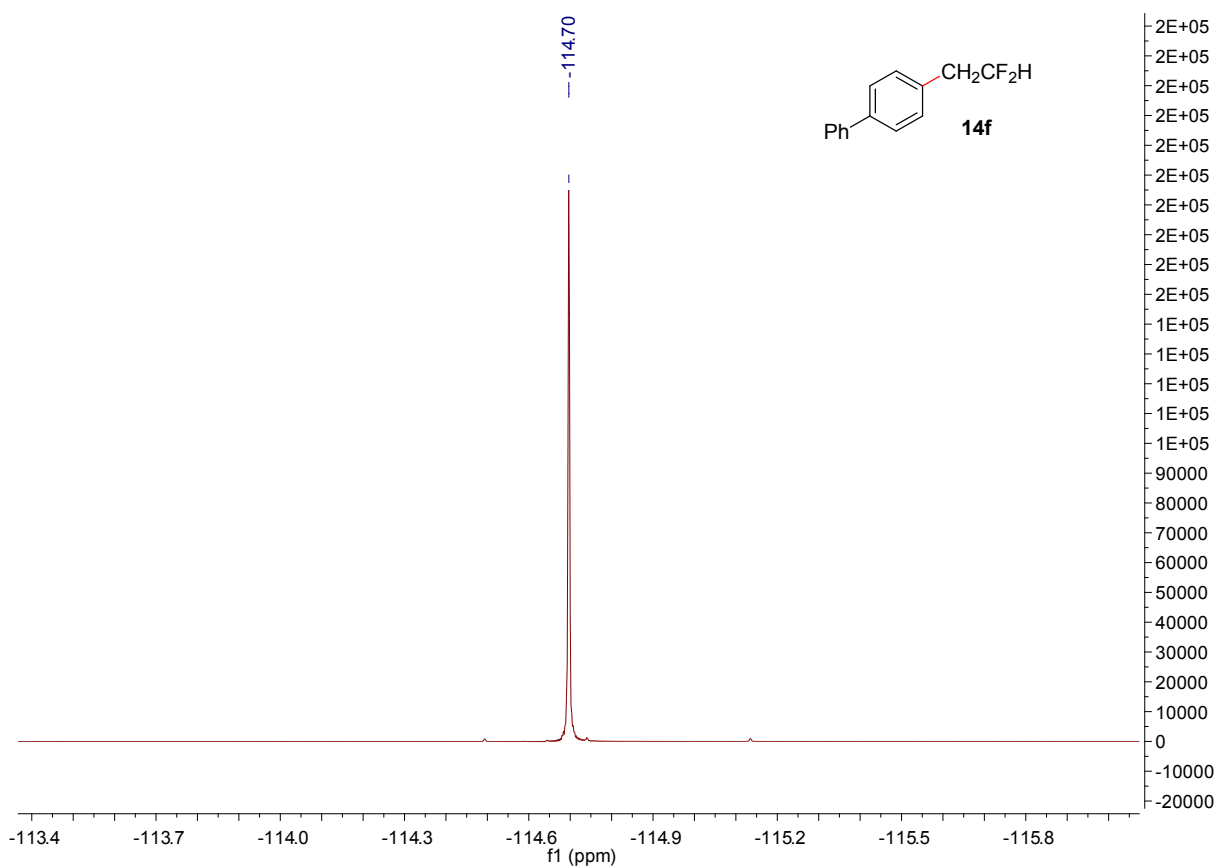

Figure S90. <sup>19</sup>F NMR of 14f in CDCl<sub>3</sub>

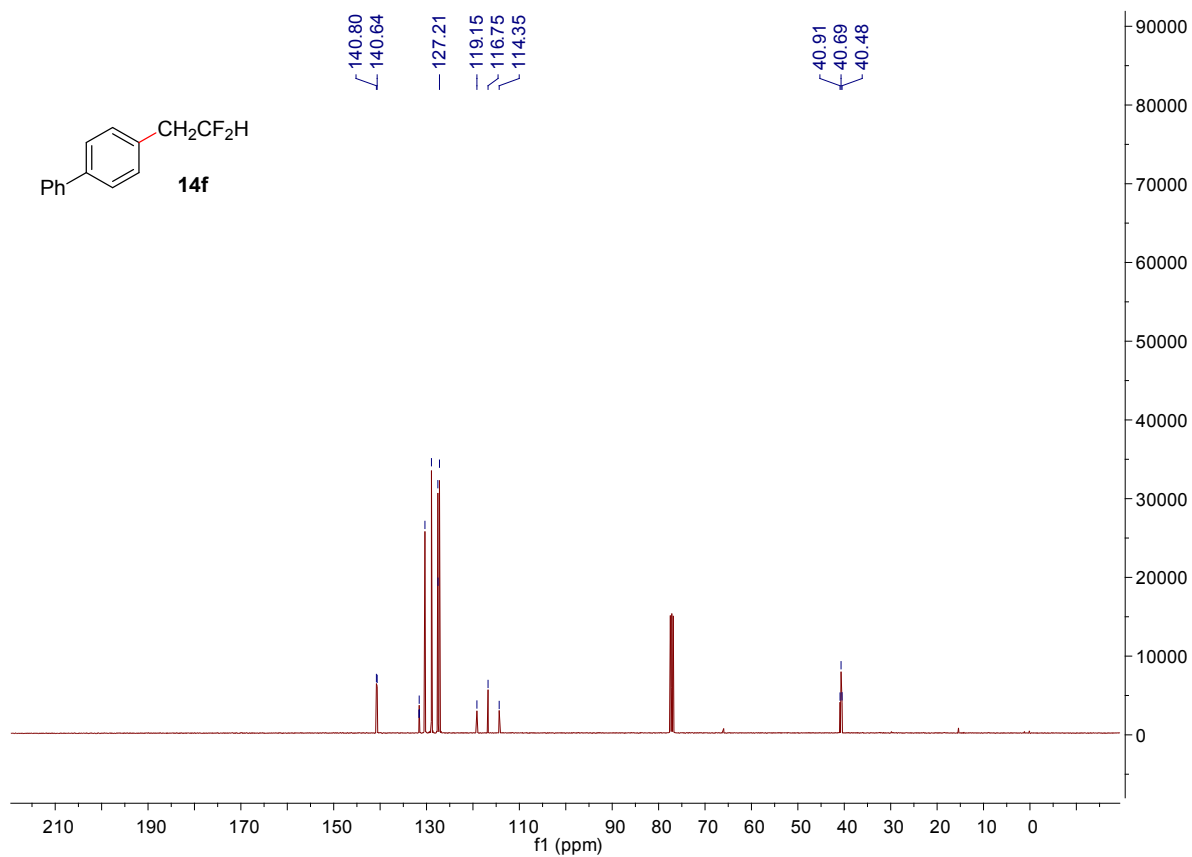

Figure S91. <sup>13</sup>C NMR of **14f** in CDCl<sub>3</sub>

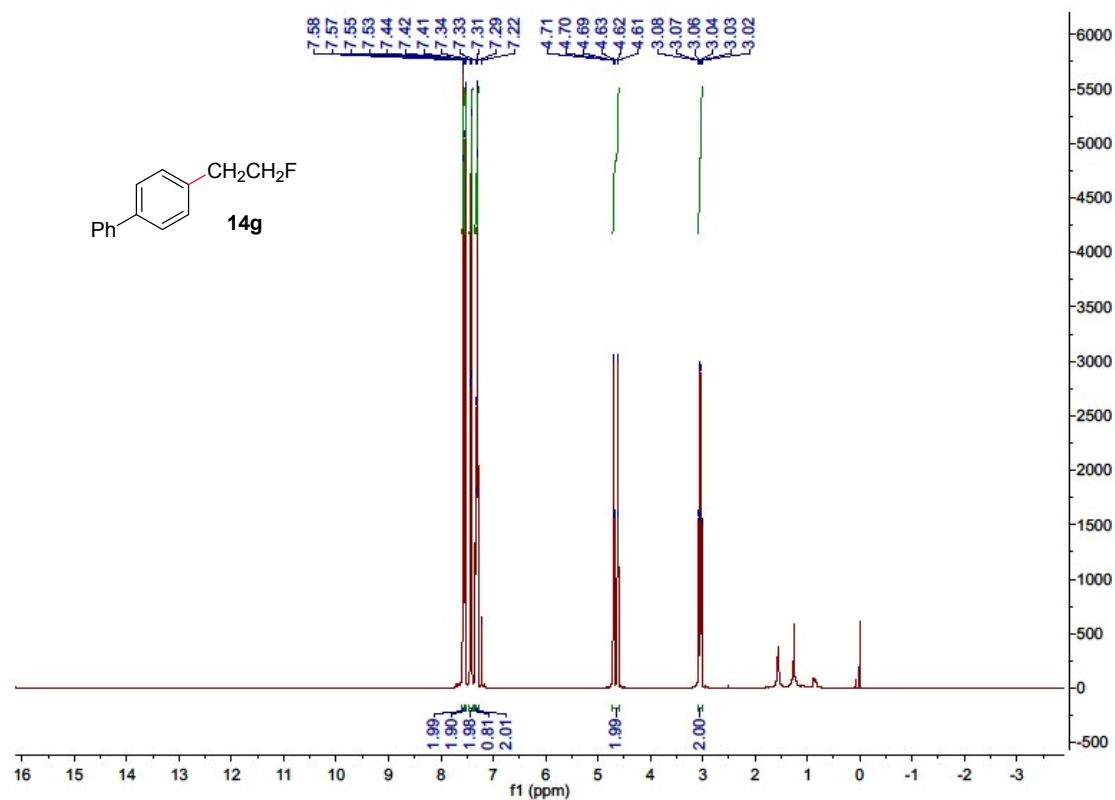

Figure S92. <sup>1</sup>H NMR of **14g** in CDCl<sub>3</sub>

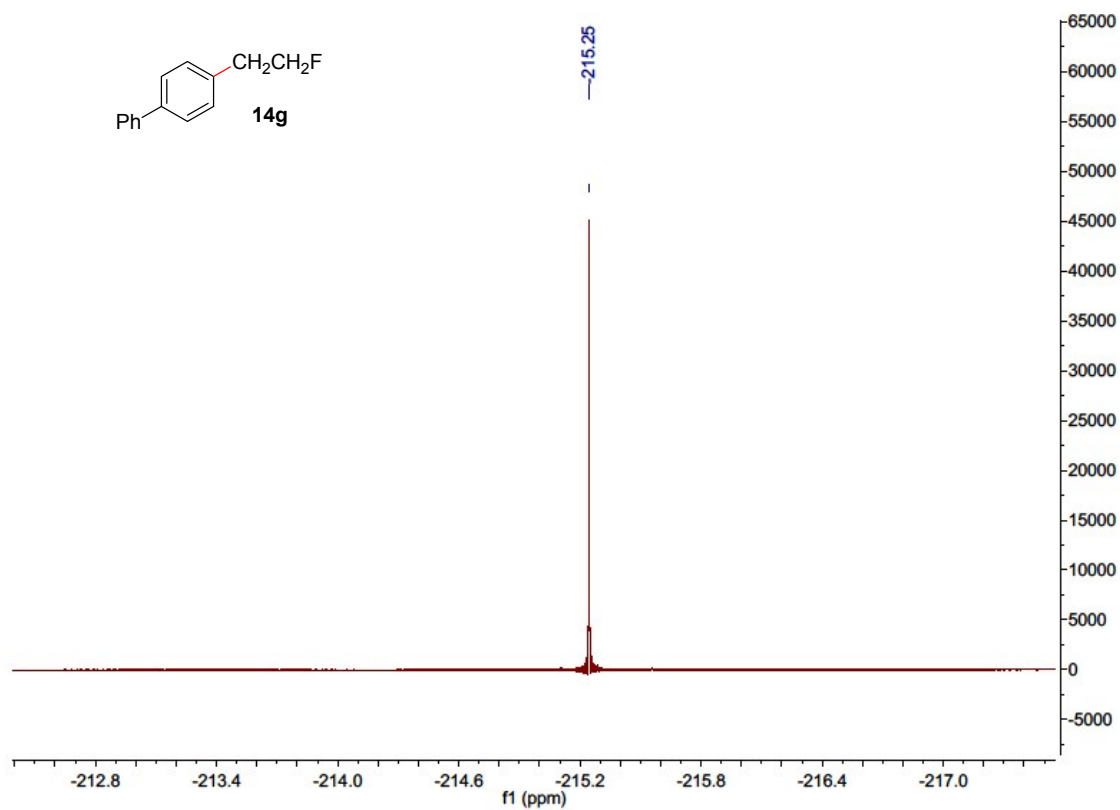

Figure S93. <sup>19</sup>F NMR of **14g** in CDCl<sub>3</sub>

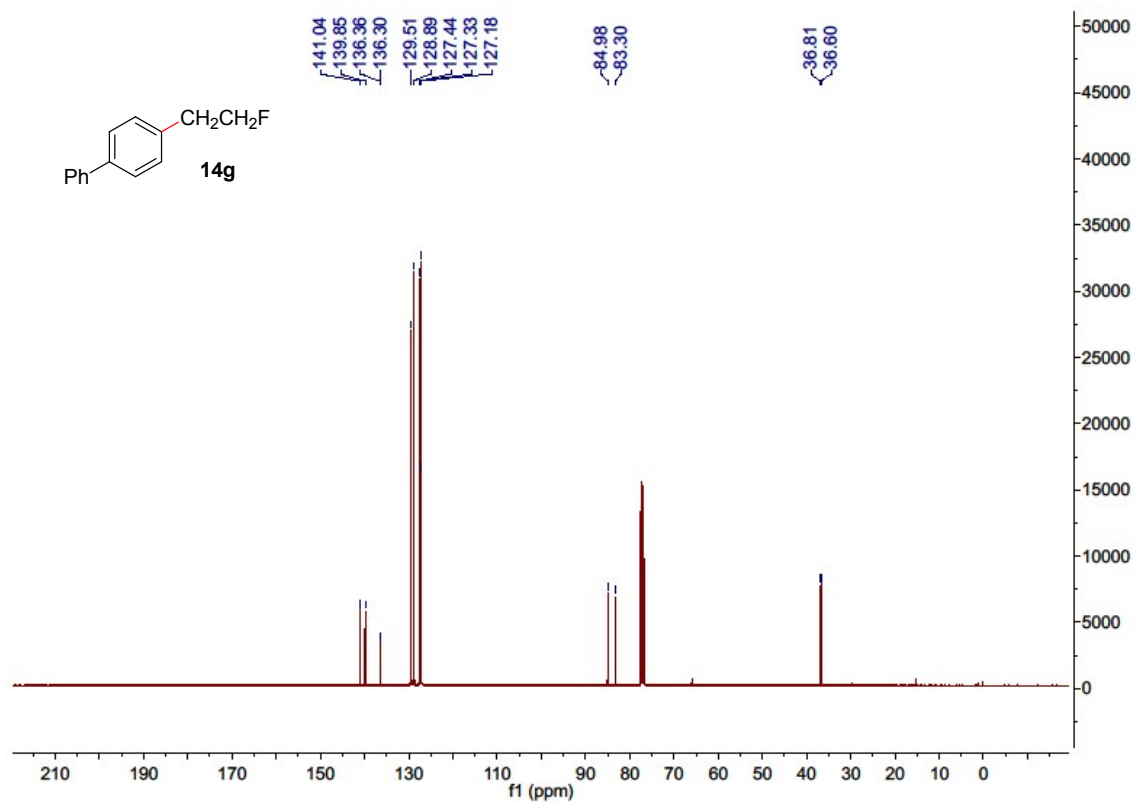

Figure S94. <sup>13</sup>C NMR of **14g** in CDCl<sub>3</sub>



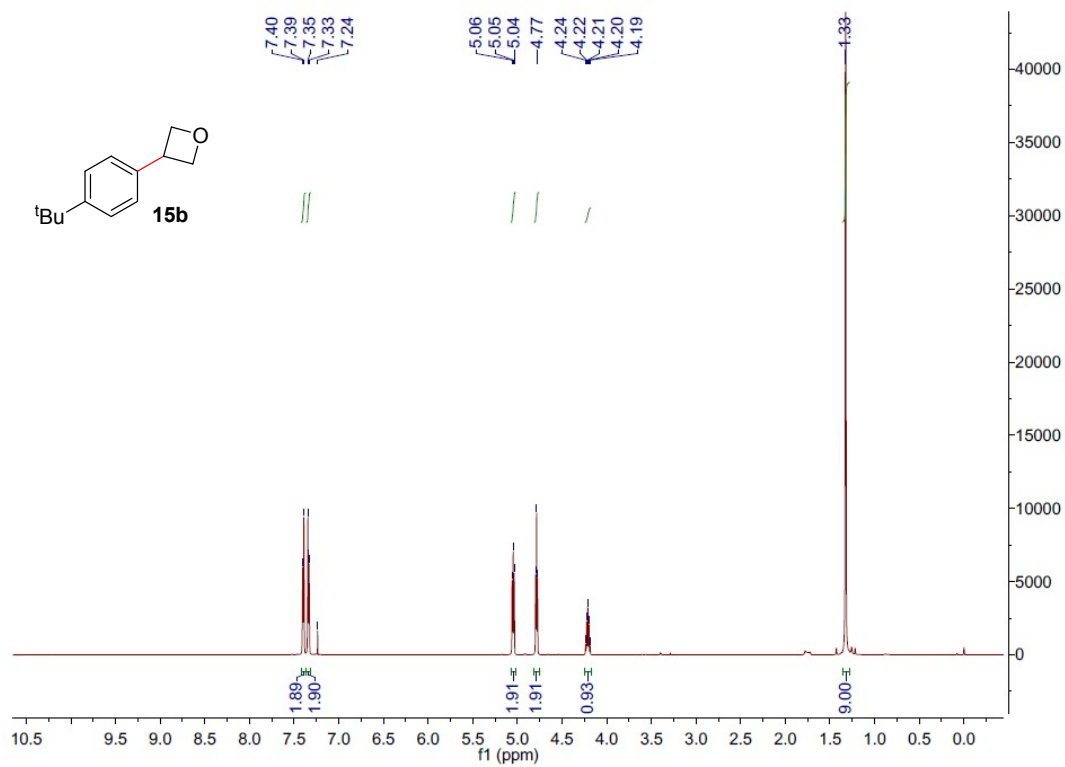

Figure S95. <sup>1</sup>H NMR of 15b in CDCl<sub>3</sub>

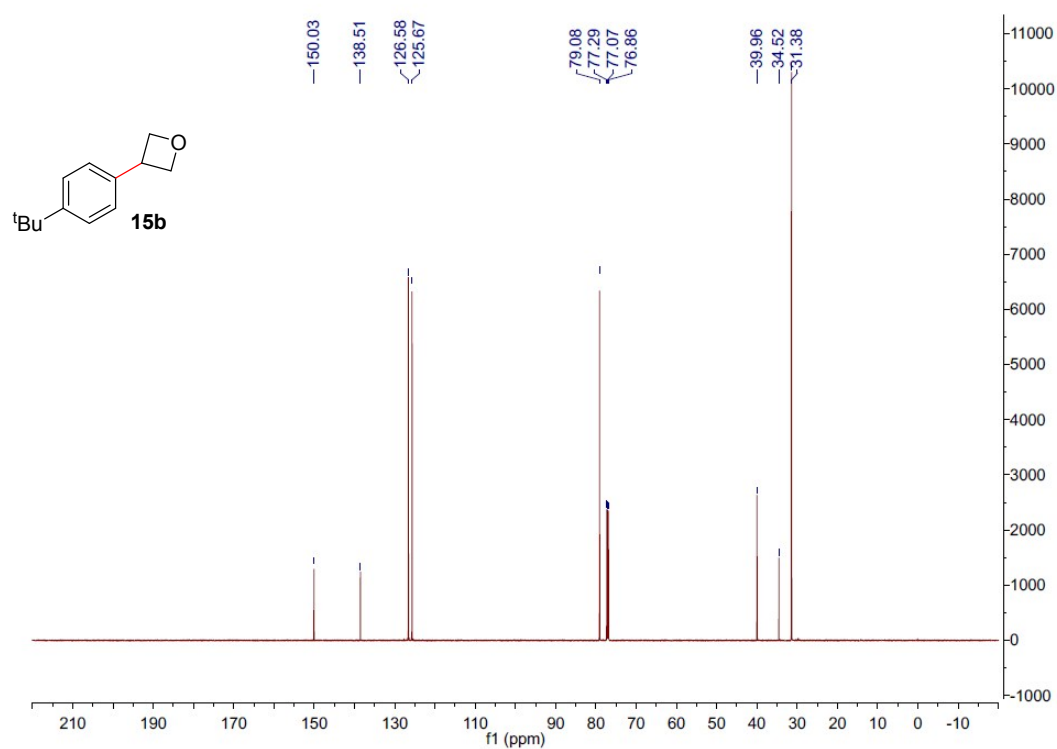

Figure S96. <sup>13</sup>C NMR of 15b in CDCl<sub>3</sub>

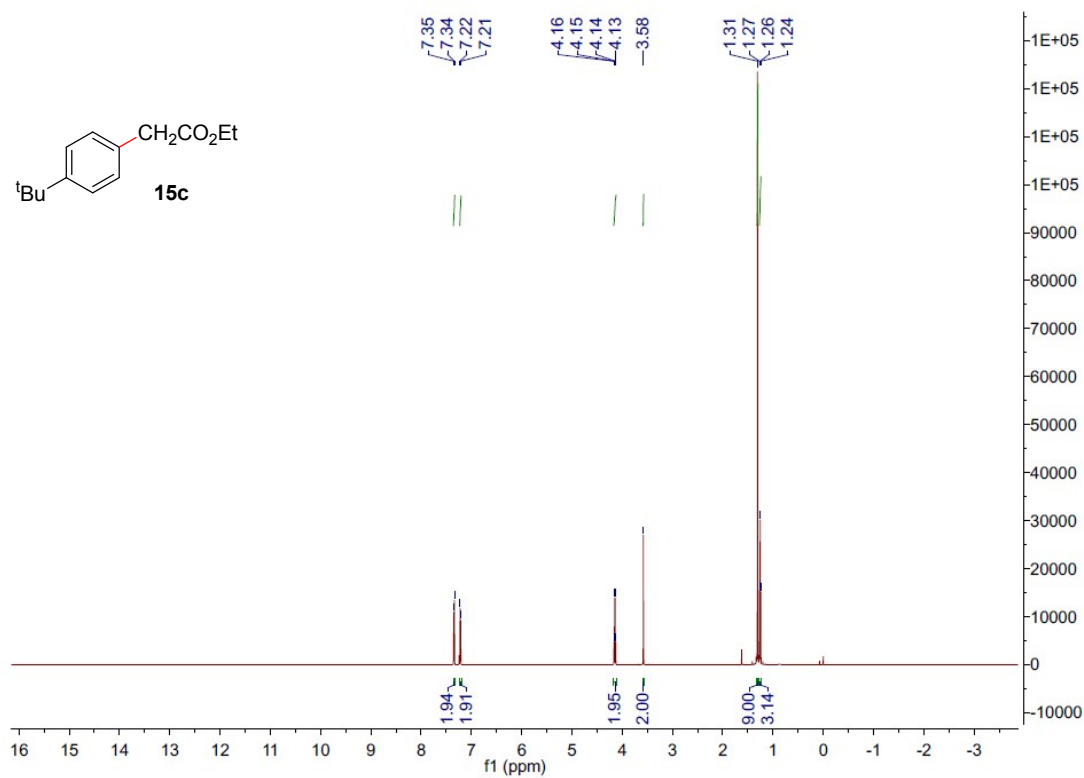

Figure S97.  $^1\text{H}$  NMR of **15c** in  $\text{CDCl}_3$

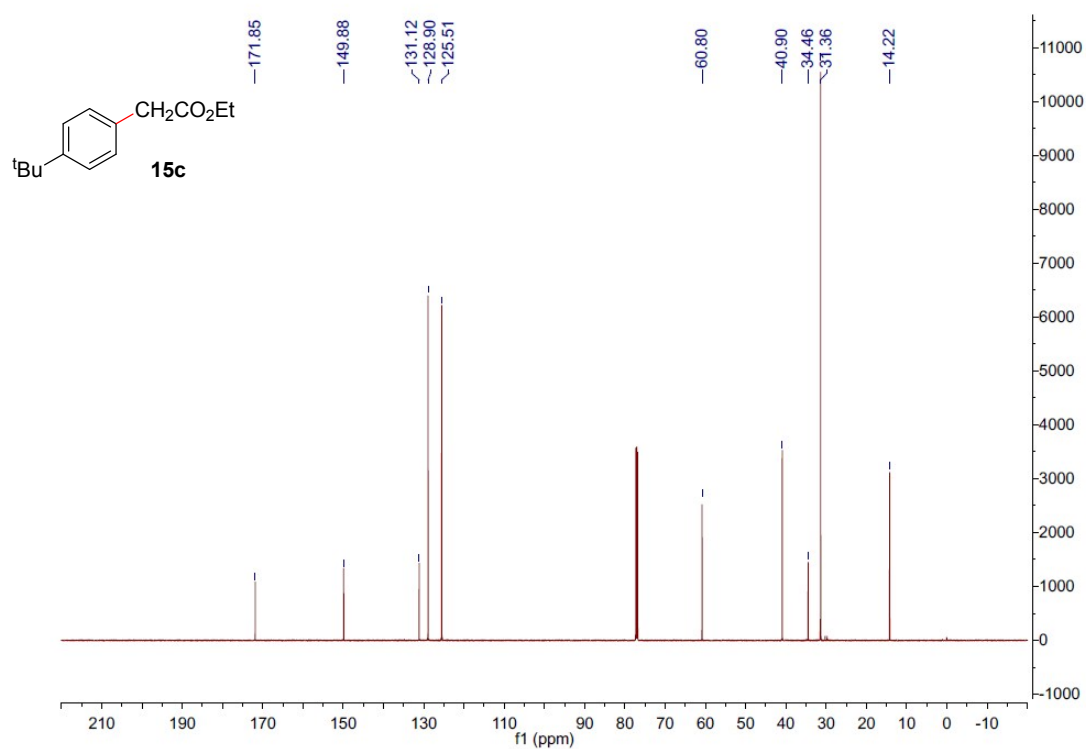

Figure S98.  $^{13}\text{C}$  NMR of **15c** in  $\text{CDCl}_3$

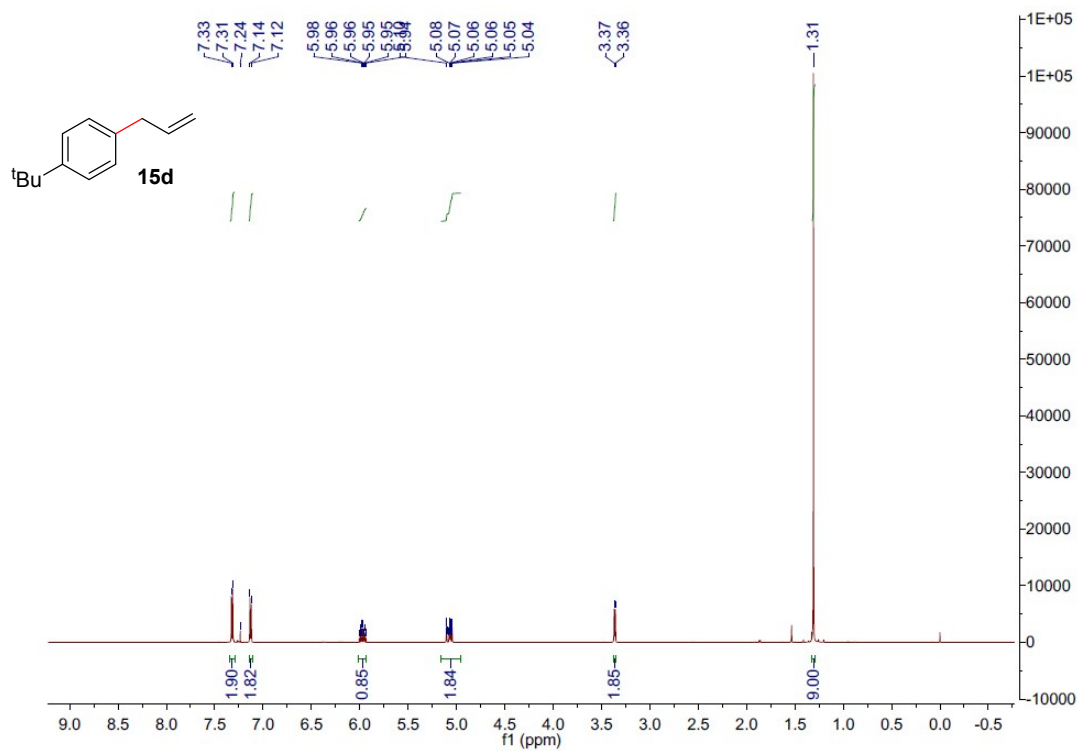

Figure S99. <sup>1</sup>H NMR of 15d in CDCl<sub>3</sub>

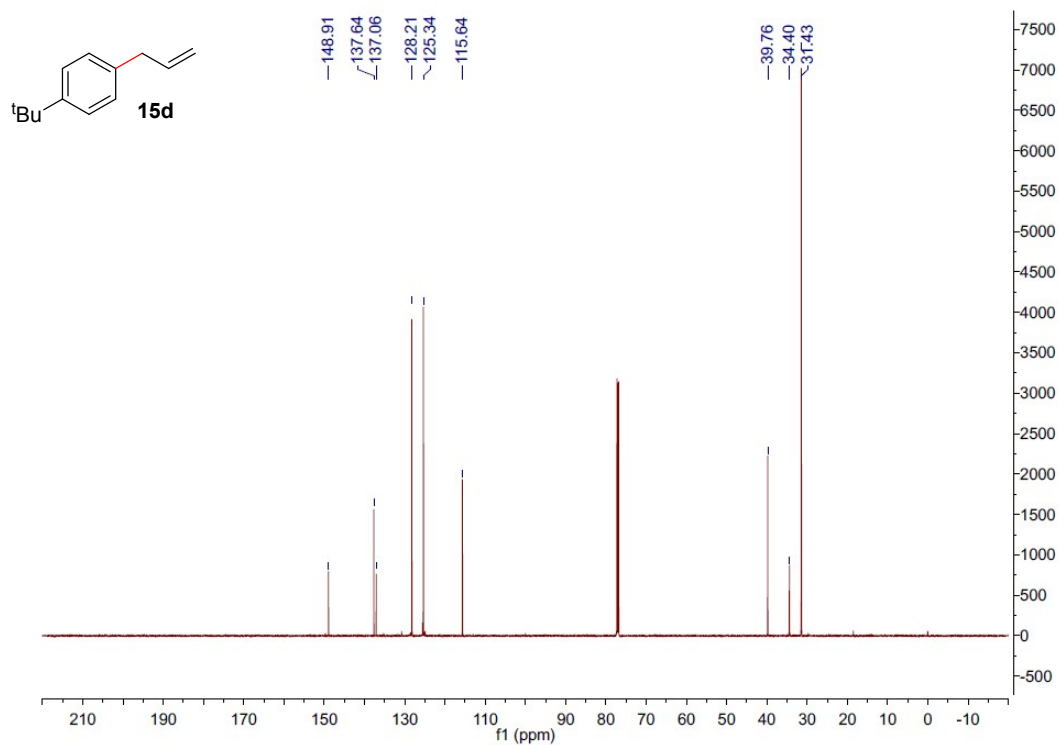

Figure S100. <sup>13</sup>C NMR of 15d in CDCl<sub>3</sub>

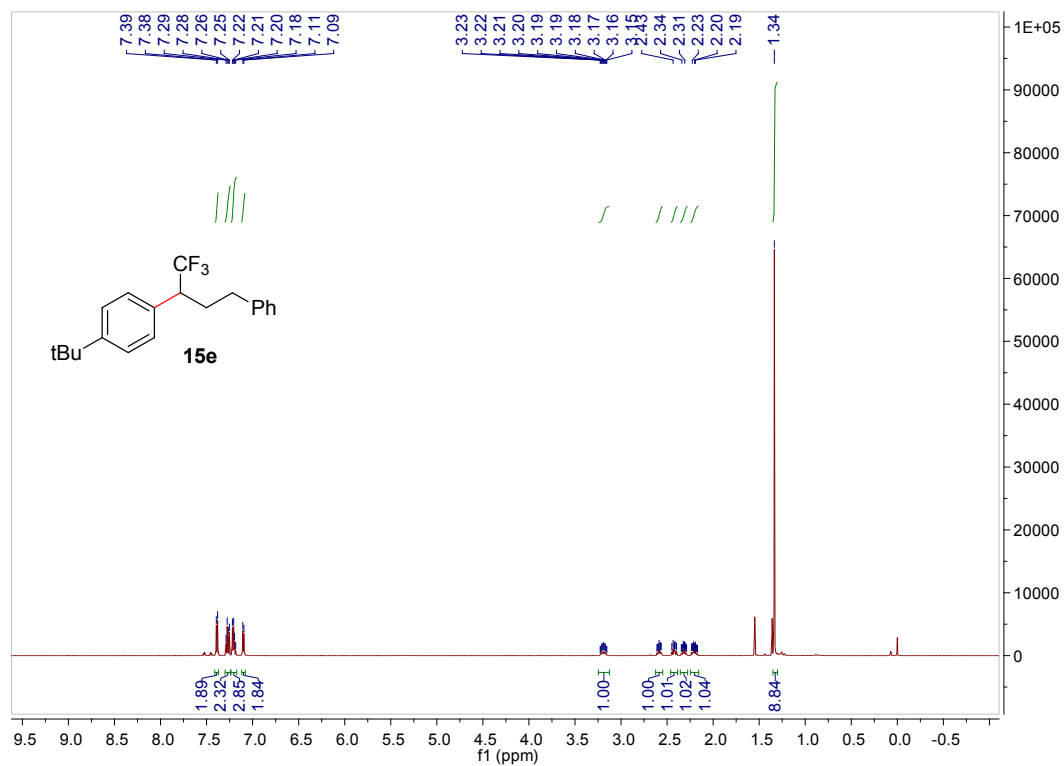

Figure S101. <sup>1</sup>H NMR of **15e** in CDCl<sub>3</sub>

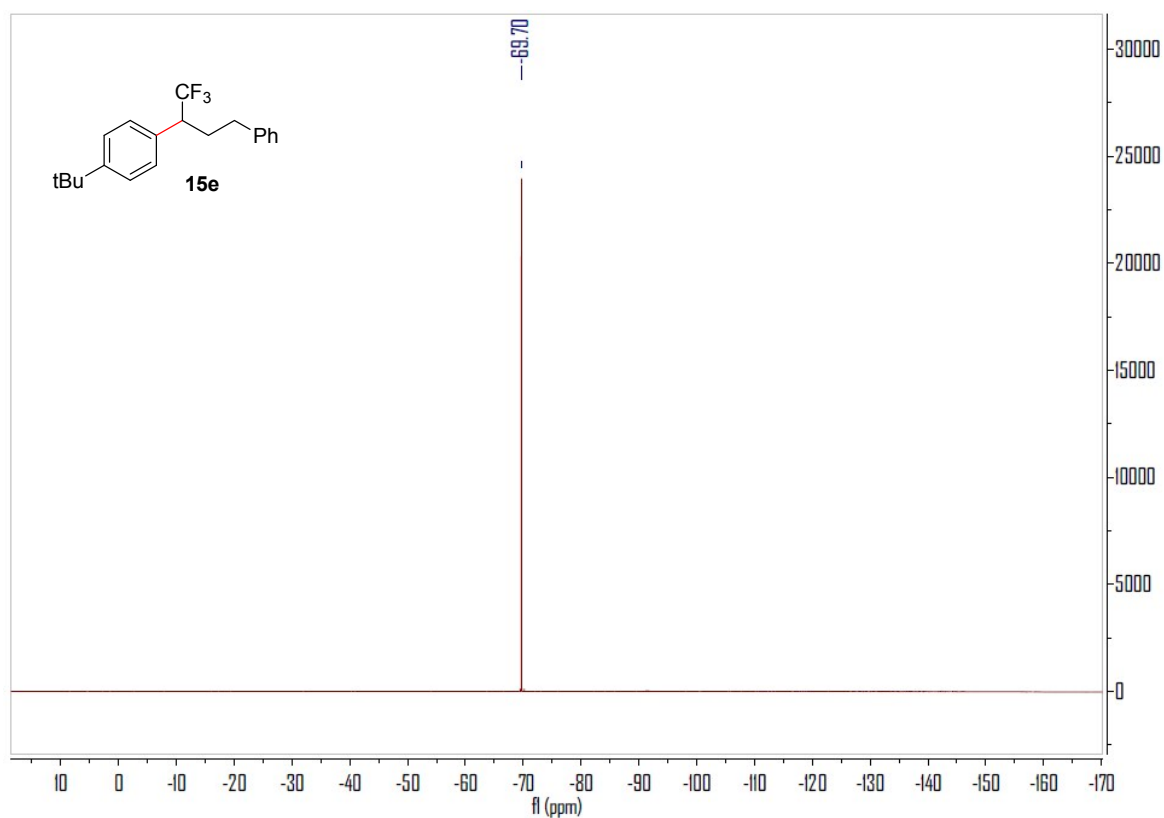

Figure S102. <sup>19</sup>F NMR of **15e** in CDCl<sub>3</sub>

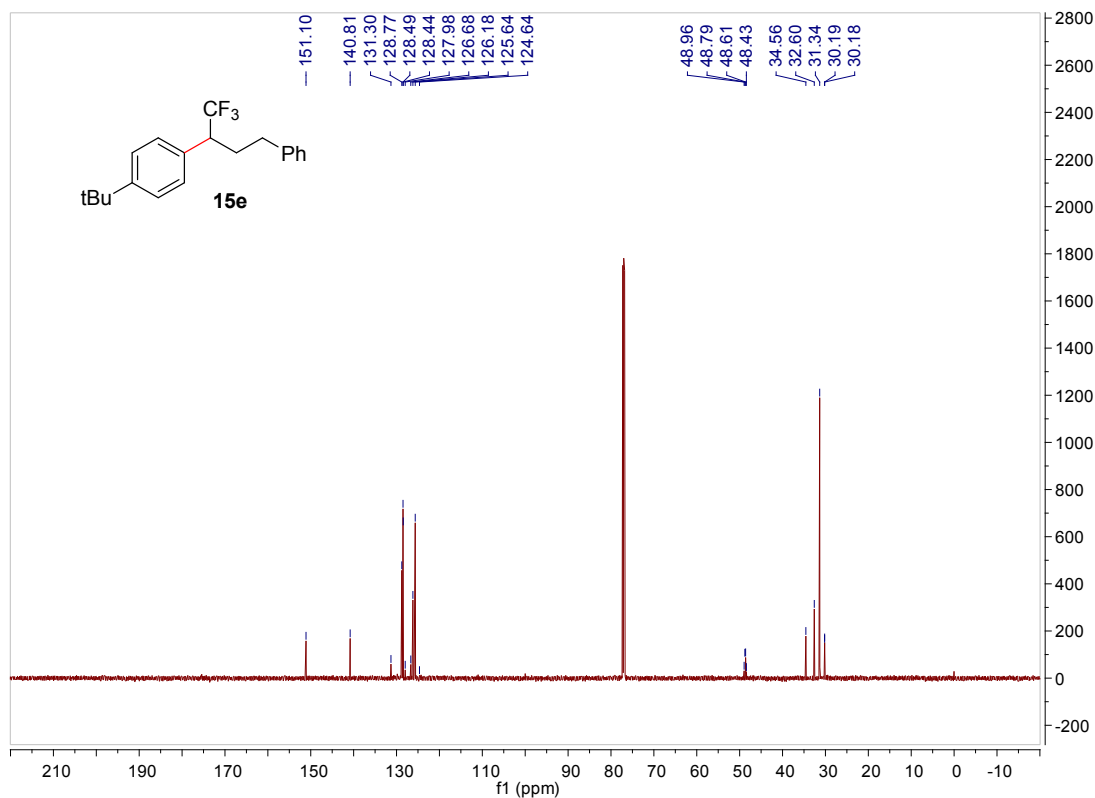

Figure S103. <sup>13</sup>C NMR of **15e** in CDCl<sub>3</sub>

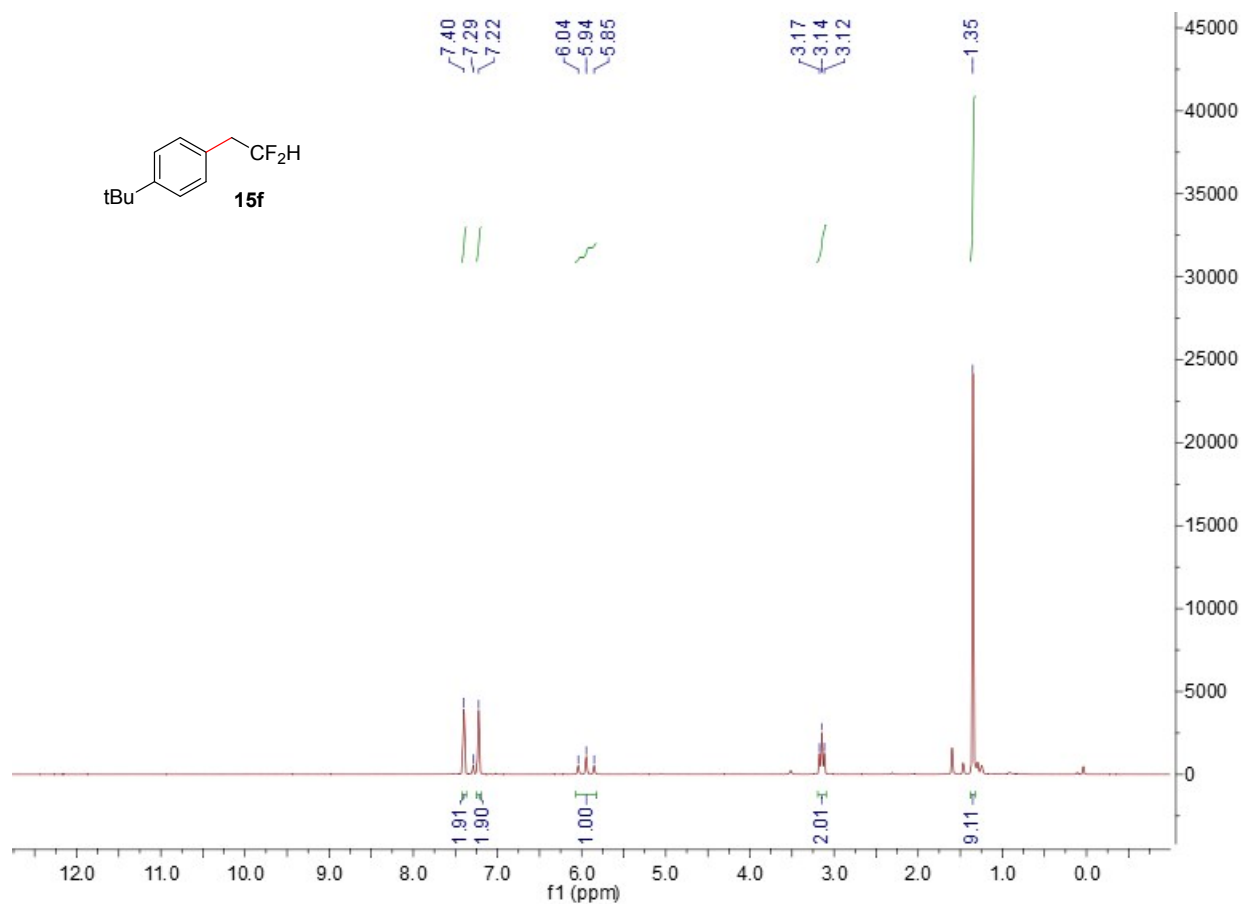

Figure S104. <sup>1</sup>H NMR of **15f** in CDCl<sub>3</sub>

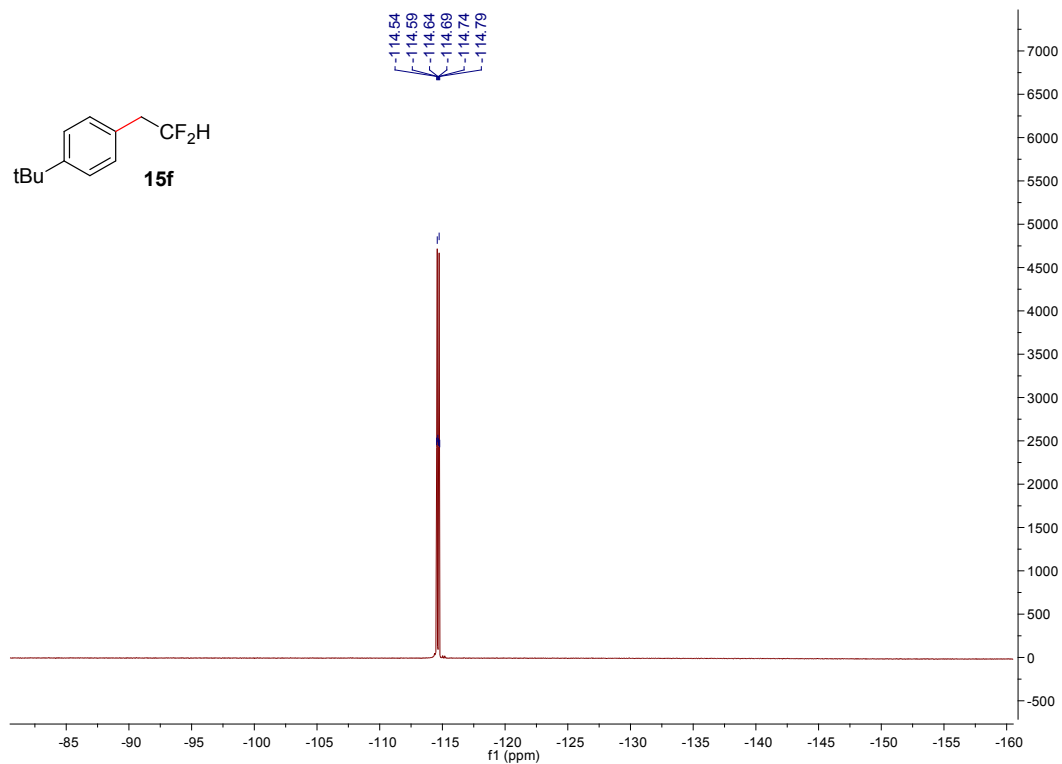

Figure S105.  $^{19}\text{F}$  NMR of **15f** in  $\text{CDCl}_3$

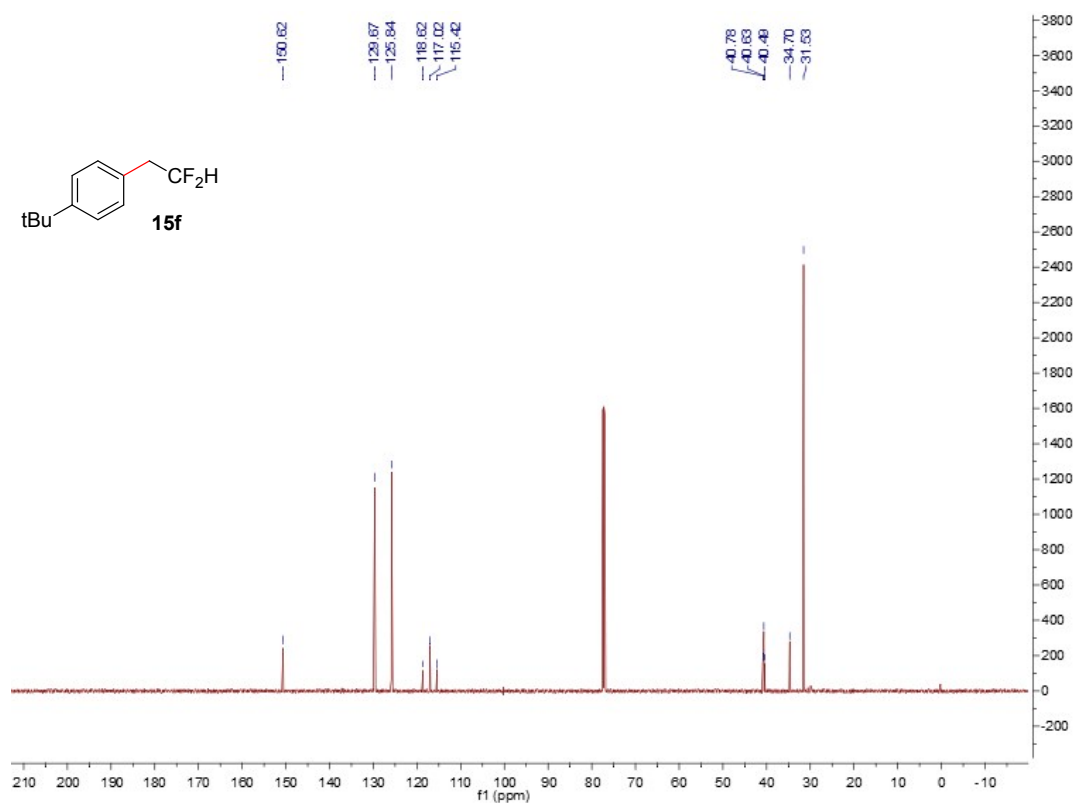

Figure S106.  $^{13}\text{C}$  NMR of **15f** in  $\text{CDCl}_3$

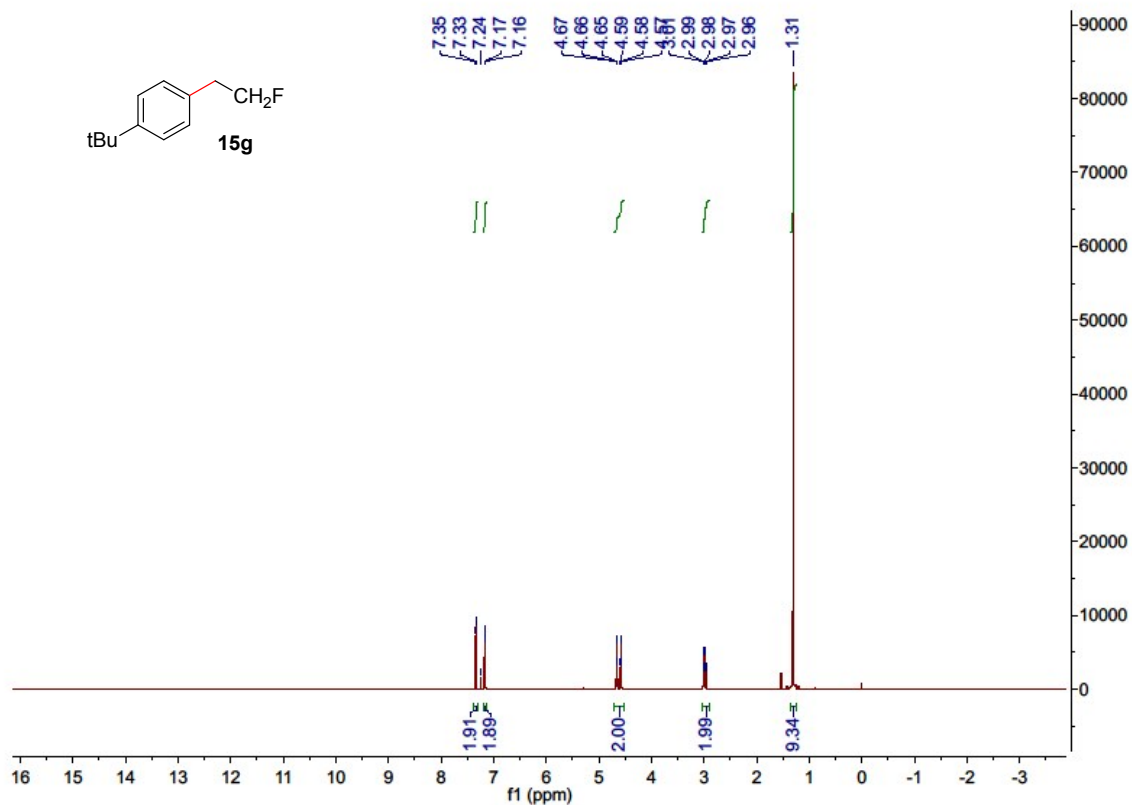

Figure S107.  $^1\text{H}$  NMR of **15g** in  $\text{CDCl}_3$

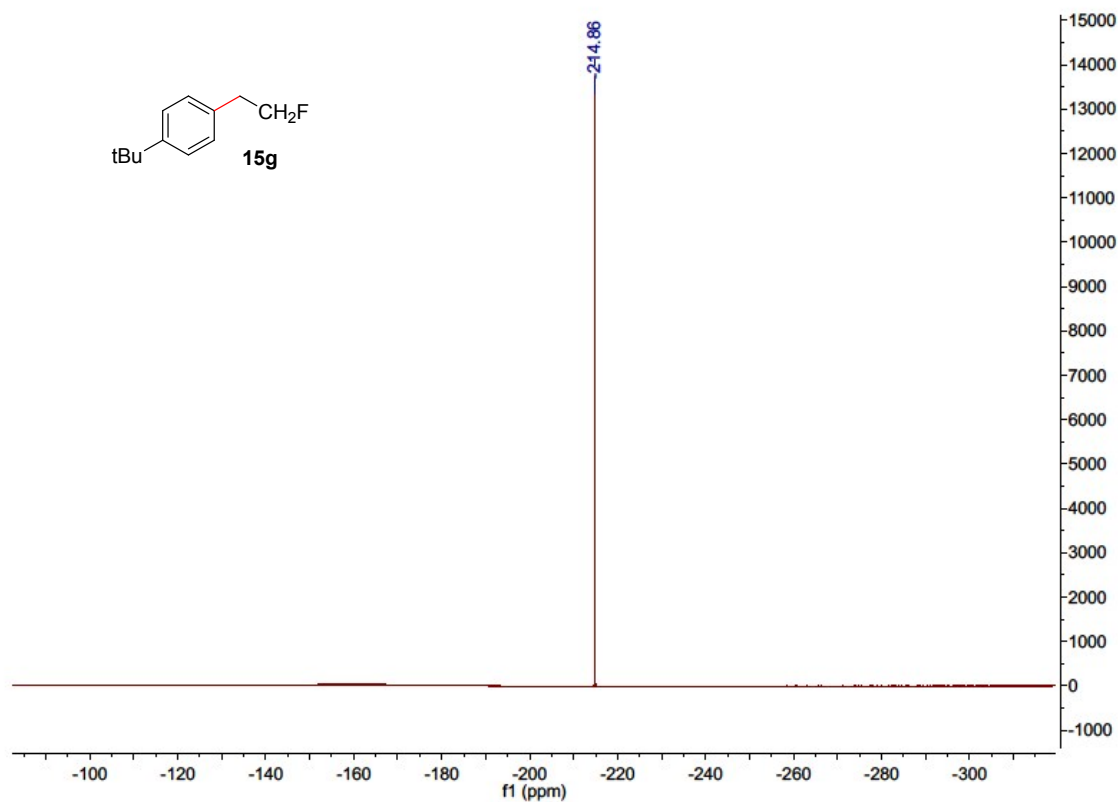

Figure S108.  $^{19}\text{F}$  NMR of **15g** in  $\text{CDCl}_3$

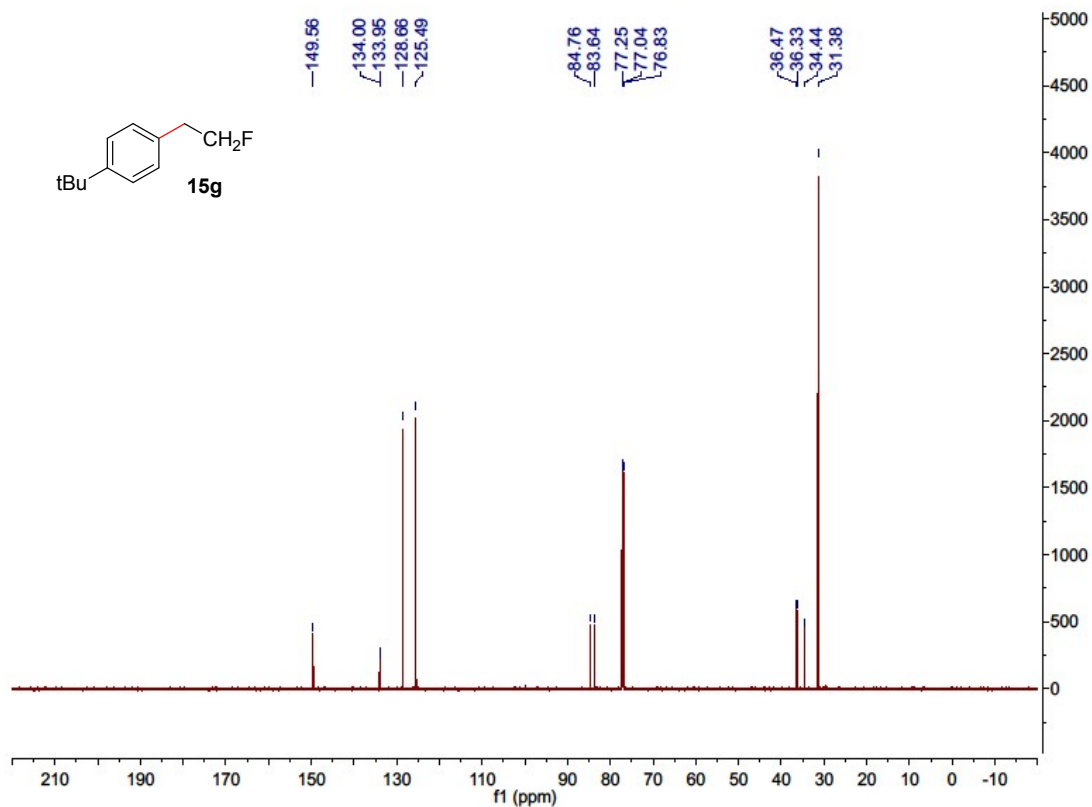

Figure S109. <sup>13</sup>C NMR of **15g** in CDCl<sub>3</sub>

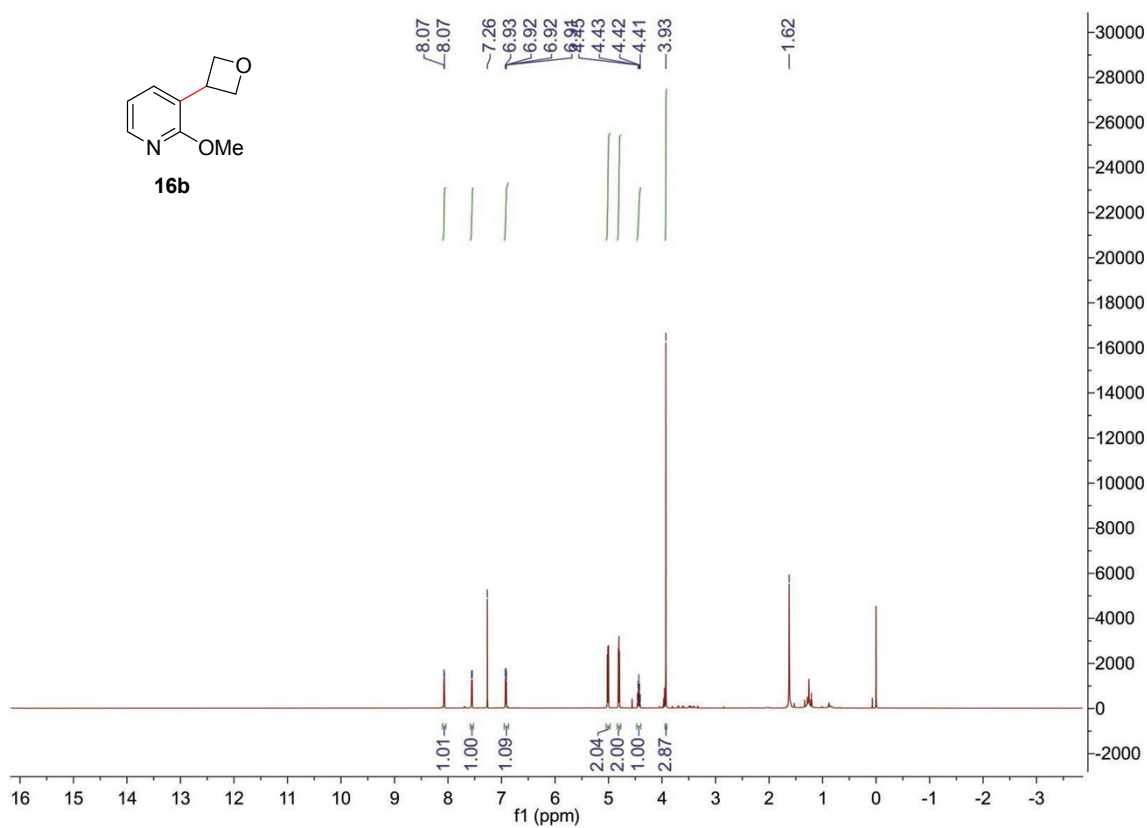

Figure S110. <sup>1</sup>H NMR of **16b** in CDCl<sub>3</sub>



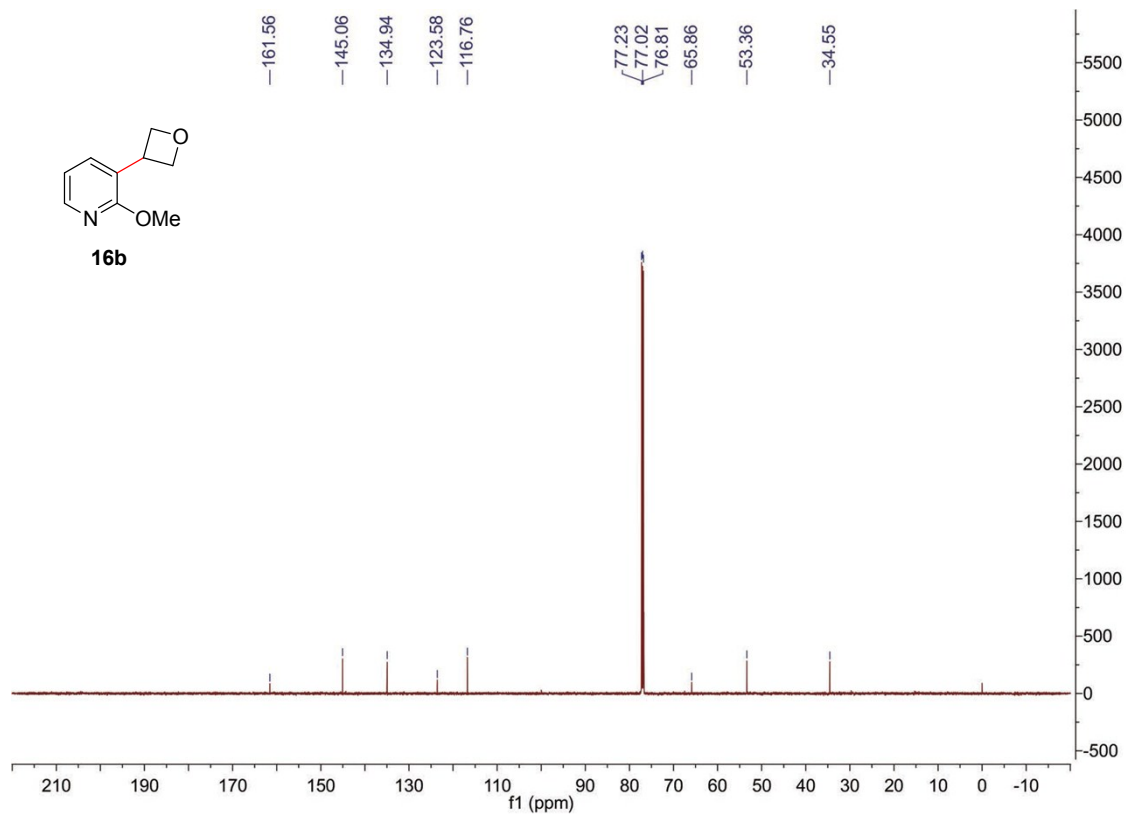

Figure S111. <sup>13</sup>C NMR of **16b** in CDCl<sub>3</sub>

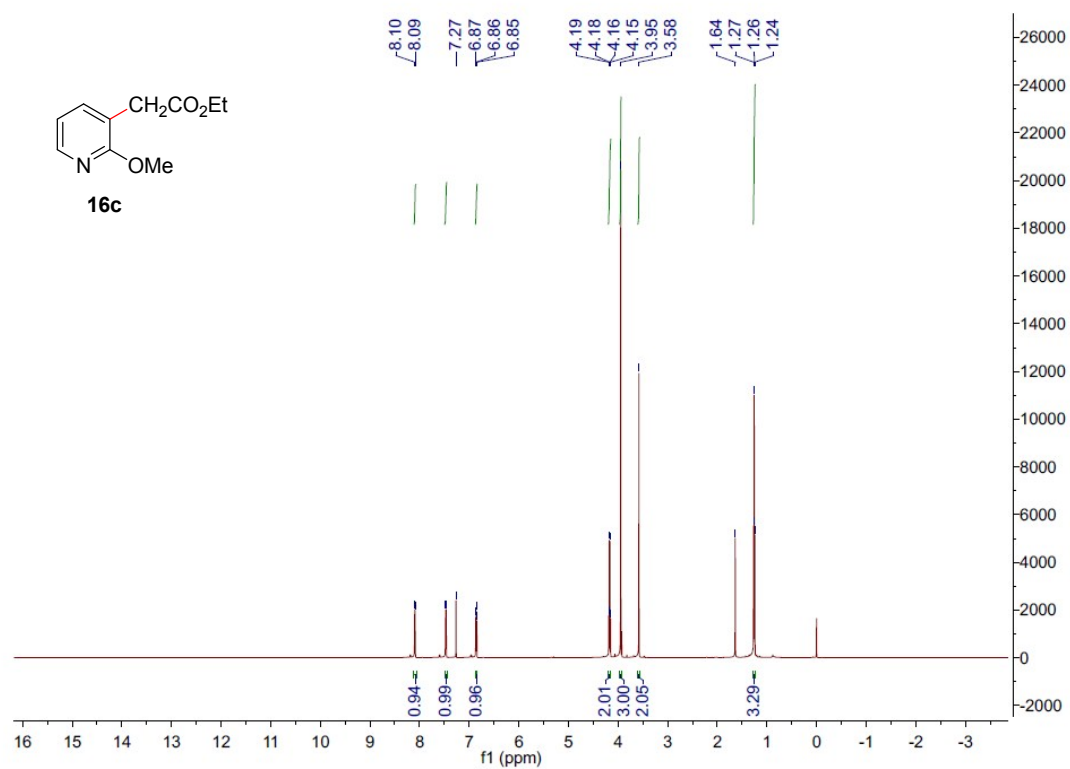

Figure S112. <sup>1</sup>H NMR of **16c** in CDCl<sub>3</sub>

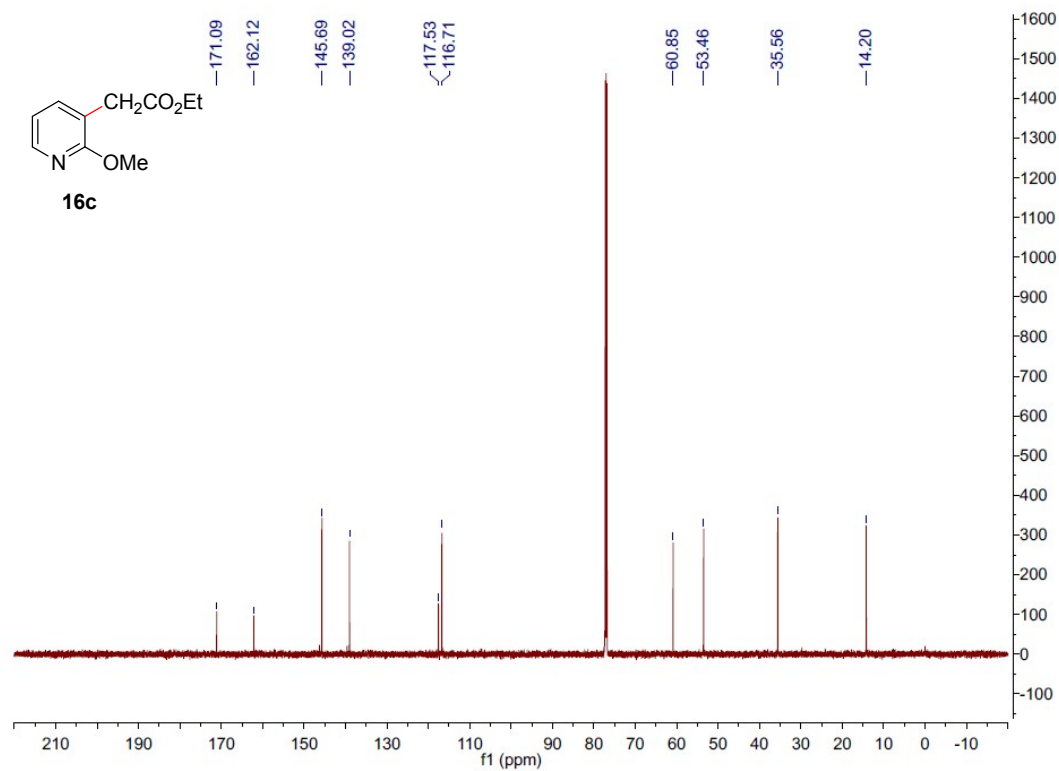

Figure S113. <sup>13</sup>C NMR of **16c** in CDCl<sub>3</sub>

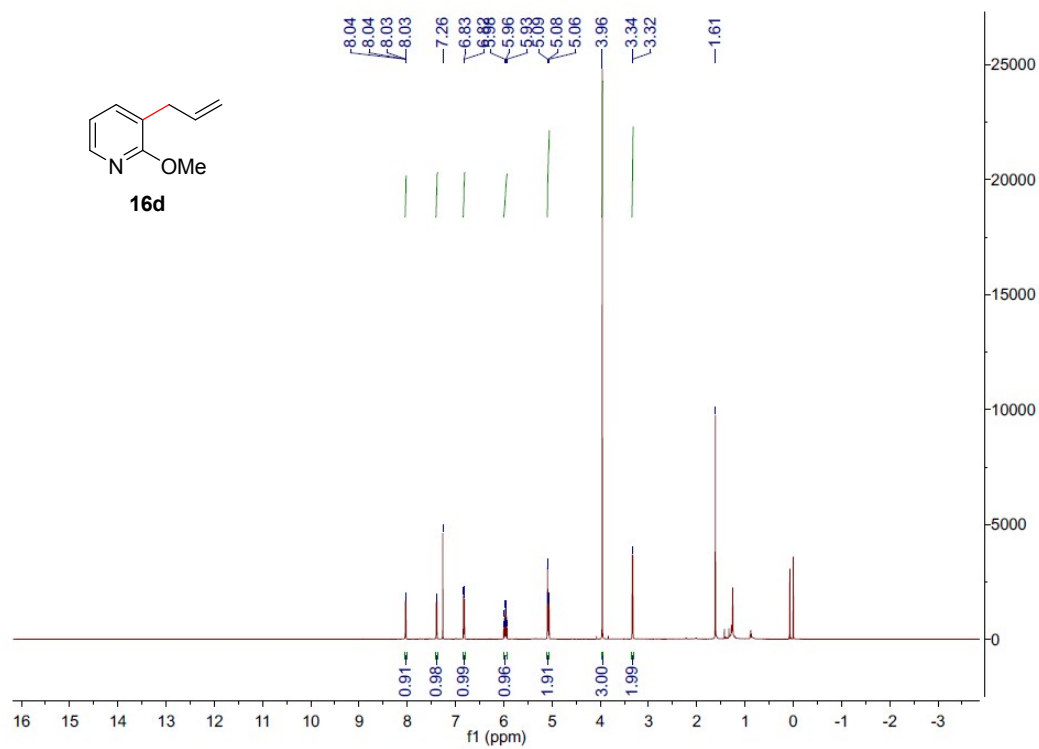

Figure S114. <sup>1</sup>H NMR of **16d** in CDCl<sub>3</sub>

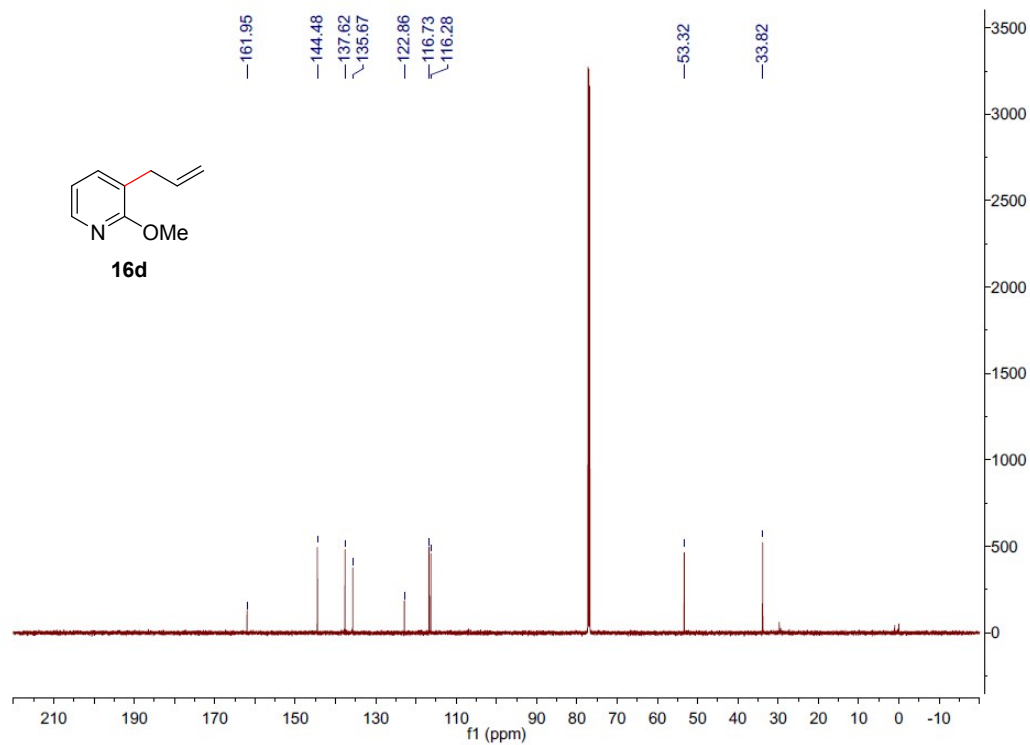

Figure S115. <sup>13</sup>C NMR of 16d in CDCl<sub>3</sub>

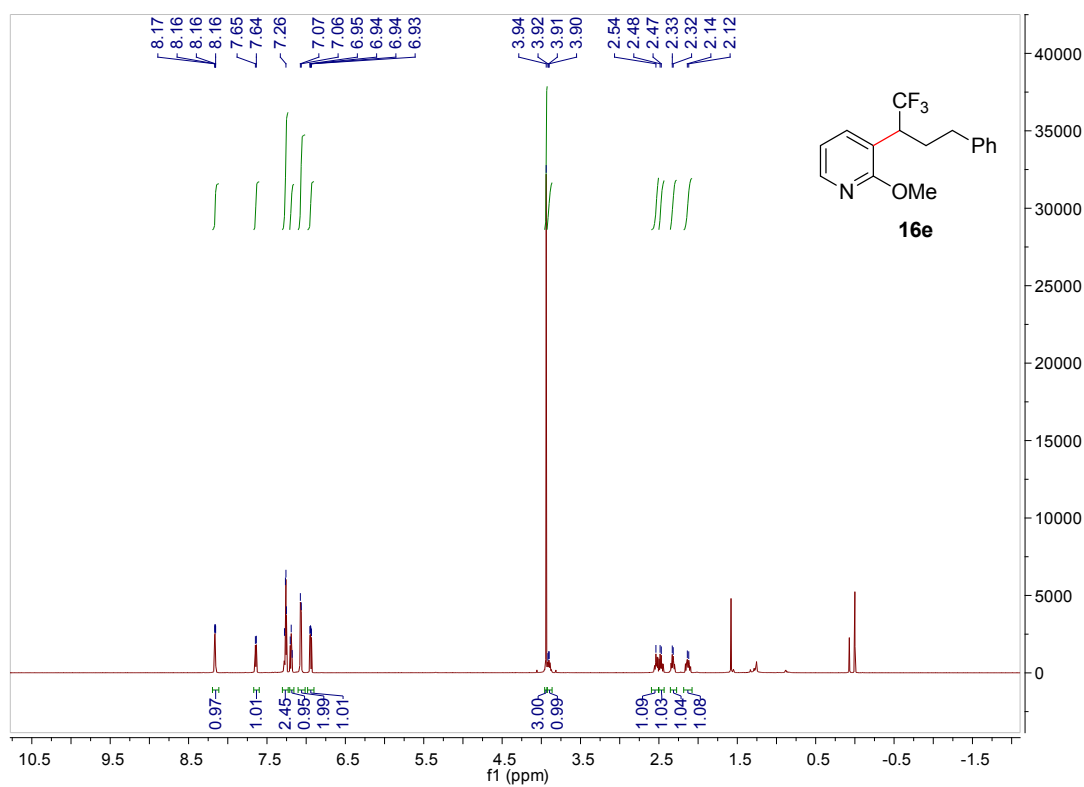

Figure S116. <sup>1</sup>H NMR of 16e in CDCl<sub>3</sub>

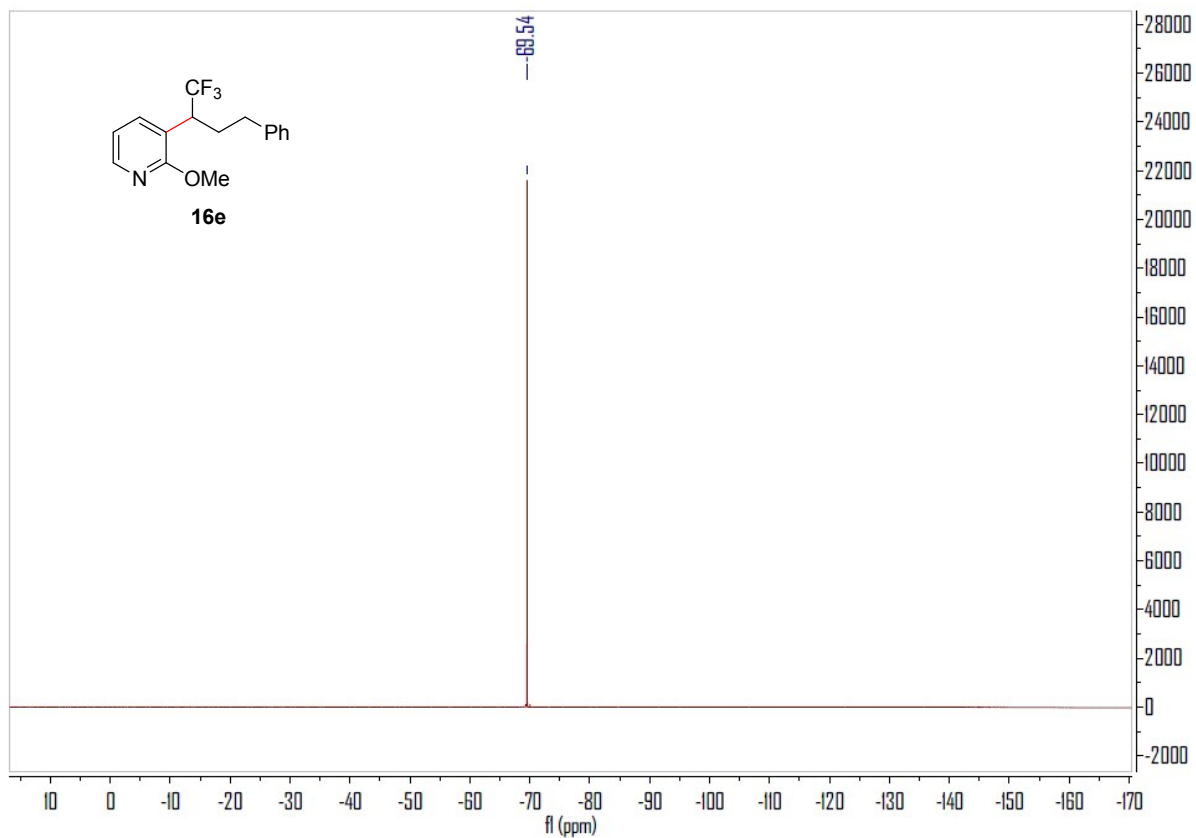

Figure S117. <sup>19</sup>F NMR of **16e** in CDCl<sub>3</sub>

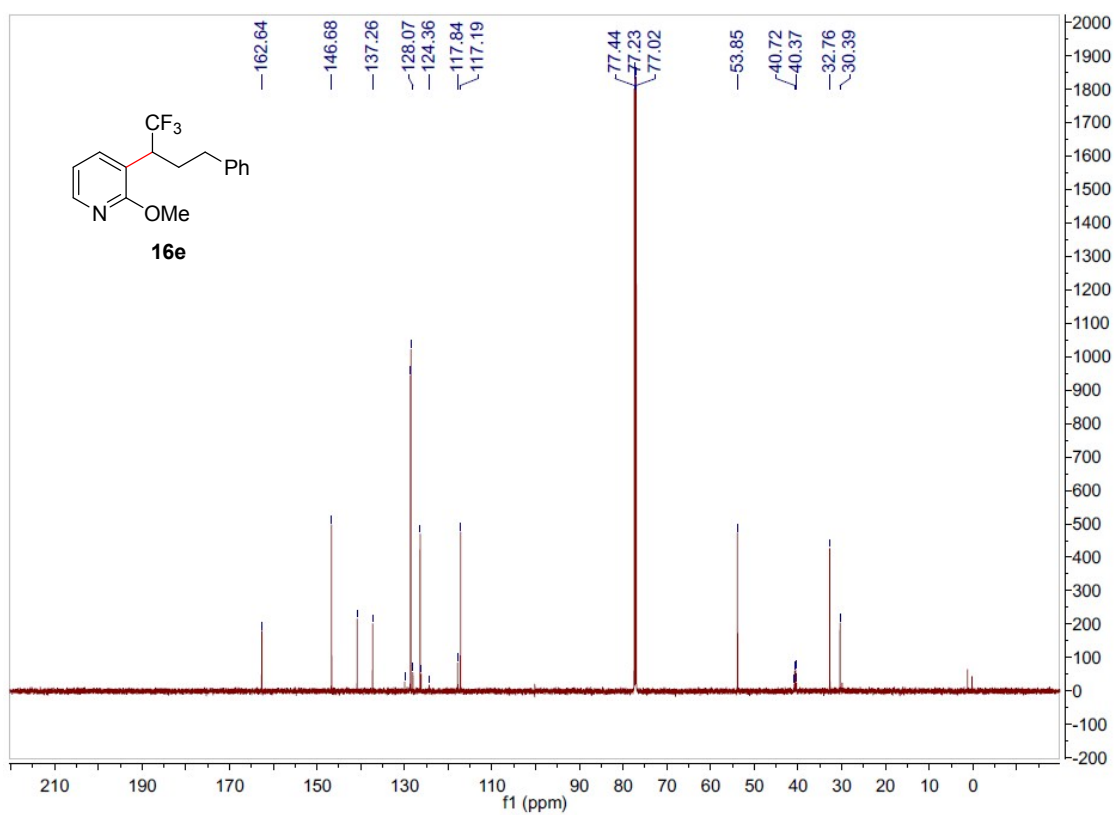

Figure S118. <sup>13</sup>C NMR of **16e** in CDCl<sub>3</sub>

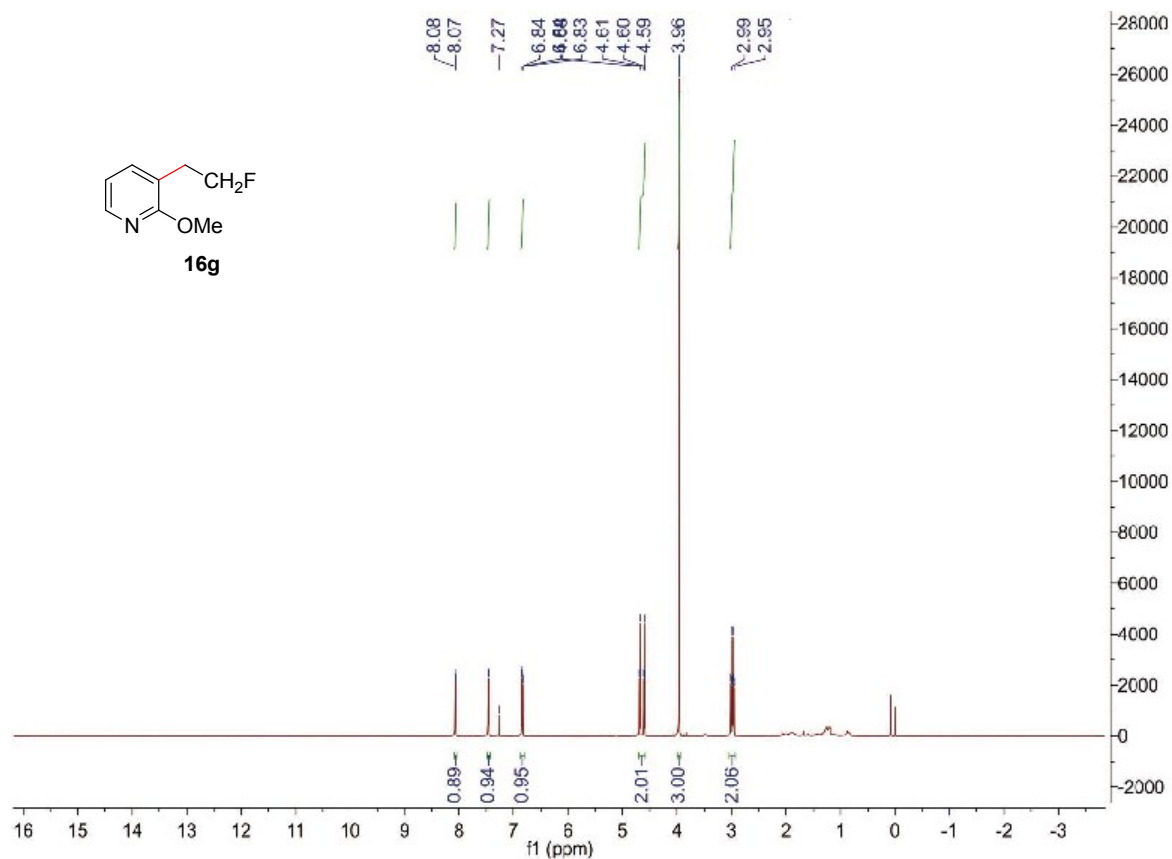

Figure S119.  $^1\text{H}$  NMR of **16g** in  $\text{CDCl}_3$

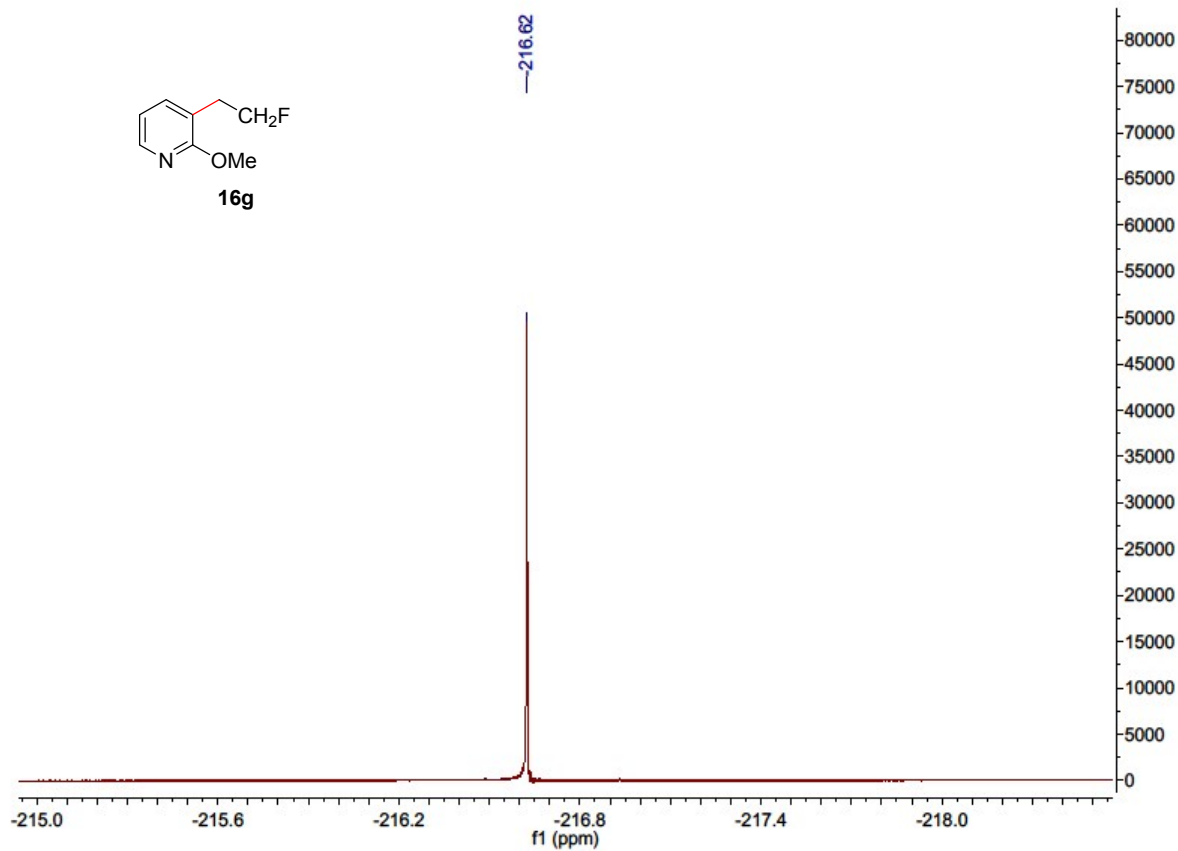

Figure S120.  $^{19}\text{F}$  NMR of **16g** in  $\text{CDCl}_3$

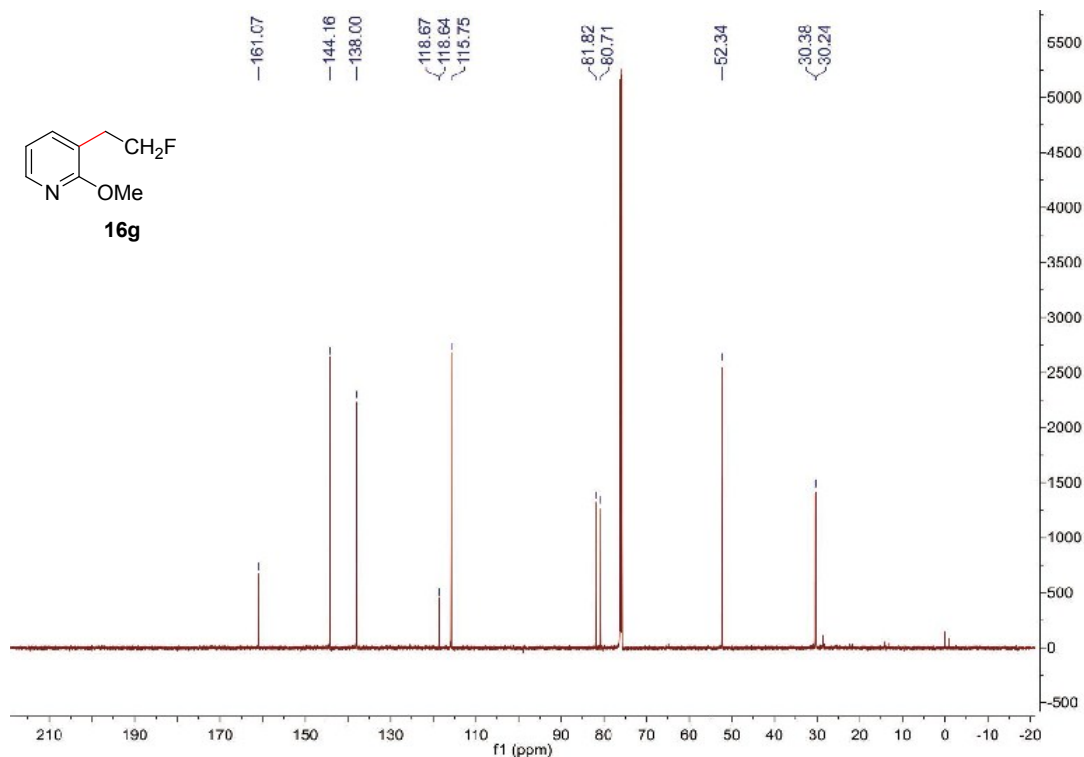

Figure S121.  $^{13}\text{C}$  NMR of **16g** in  $\text{CDCl}_3$

## VI. Control experiments for mechanistic studies

### (a) Control experiments for identifying the roles of trifluoroethyl ligands in precatalyst **2**

#### i) Continuous NMR monitoring of $(\text{bipy})\text{Ni}(\text{CH}_2\text{CF}_3)_2$ upon heating

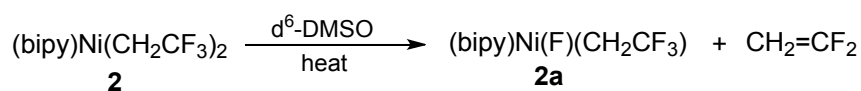

The precatalyst  $(\text{bipy})\text{Ni}(\text{CH}_2\text{CF}_3)_2$  **2** (4.6 mg) was dissolved in  $\text{d}^6\text{-DMSO}$  (0.5 mL) with addition of  $\text{PhCF}_3$  (3.0  $\mu\text{L}$ ) as internal standard which was loaded into a J. Young NMR tube. The solution was heated at the indicated temperature for fixed time and then recorded by a 400M NMR instrument. It was found that the decomposition of **2** started at a slight heating (approximately 40-50  $^\circ\text{C}$ ) for an evolution of  $\text{CH}_2=\text{CF}_2$ . When the temperature was elevated further to 60-80  $^\circ\text{C}$ , fast extrusion of  $\text{CH}_2=\text{CF}_2$  from **2** was observed. Attempts to fingerprint the transient  $[(\text{bipy})\text{Ni}(\text{F})(\text{CH}_2\text{CF}_3)]$  **2a** via NMR were unsuccessful which might be attributed to the mentioned redistribution reaction to afford  $[(\text{bipy})\text{Ni}(\text{CH}_2\text{CF}_3)_2]$ .

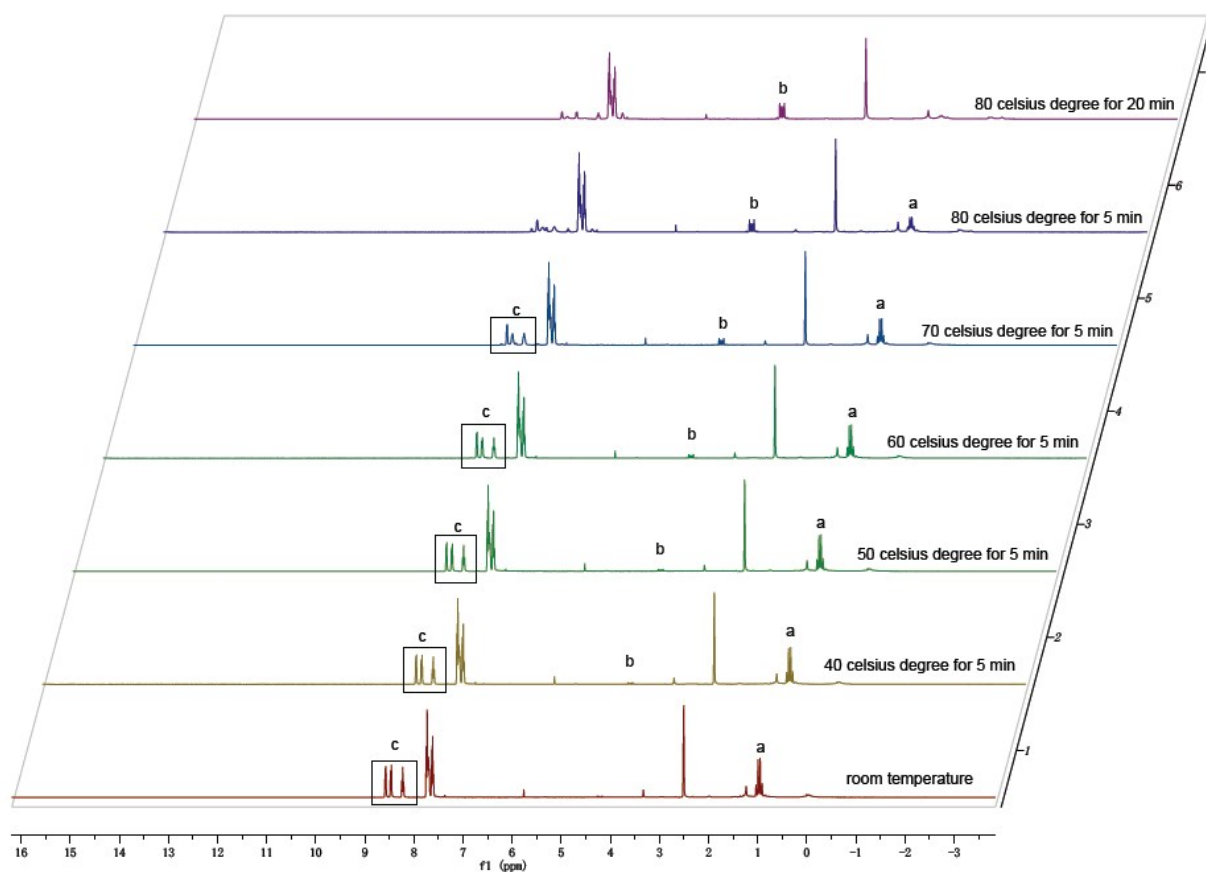

**Figure S122.  $^1\text{H}$  NMR spectrums of precatalyst **2** in a variable temperature experiment**

<sup>a</sup>methylene peaks of precatalyst **2**; <sup>b</sup> $\text{CH}_2=\text{CF}_2$  gas peaks; <sup>c</sup>bipy peaks of precatalyst **2**.

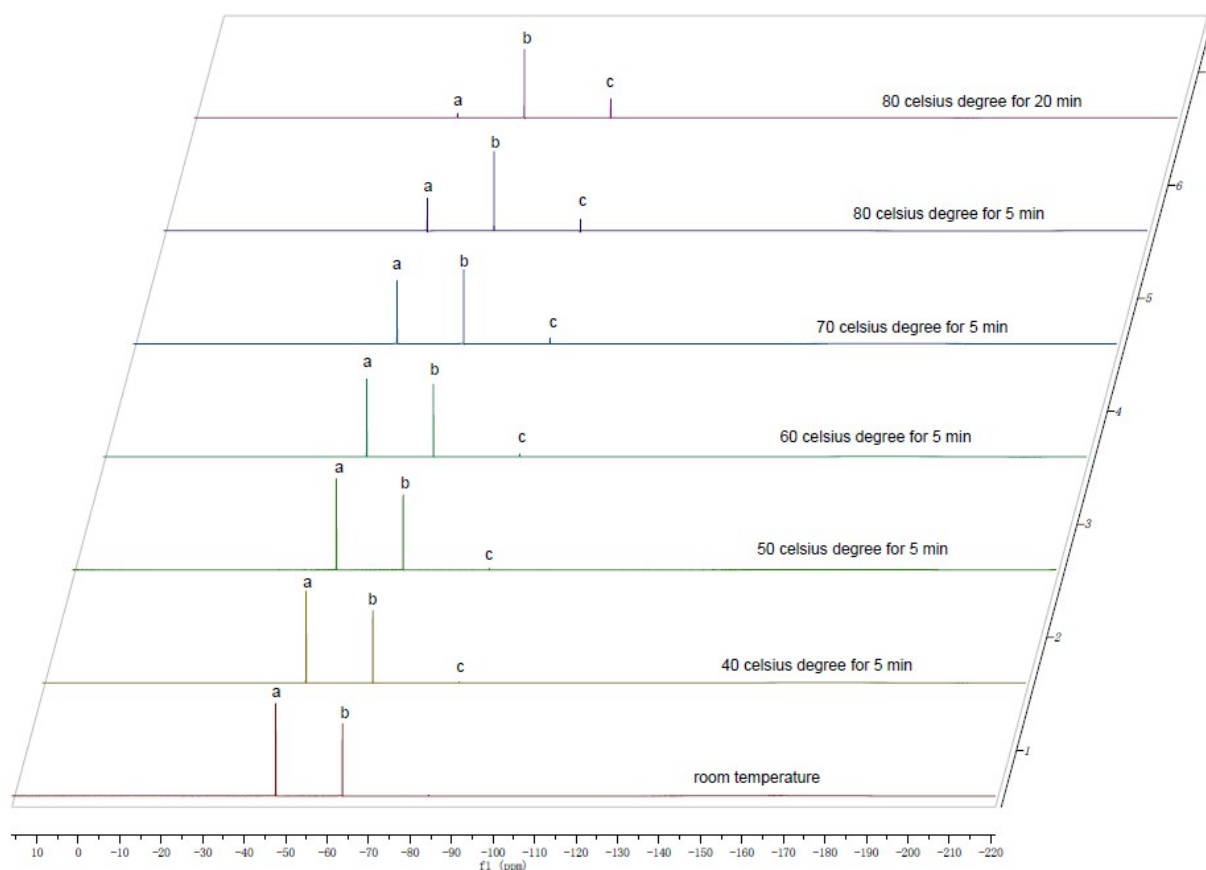

**Figure S123.  $^{19}\text{F}$  NMR spectrums of precatalyst **2** in a variable temperature experiment**

<sup>a</sup>trifluoromethyl peak of precatalyst **2**; <sup>b</sup>trifluorotoluene (internal standard); <sup>c</sup> $\text{CH}_2=\text{CF}_2$  gas peaks.

## ii) NMR experiments for identifying the role of trifluoroethyl groups bound to nickel

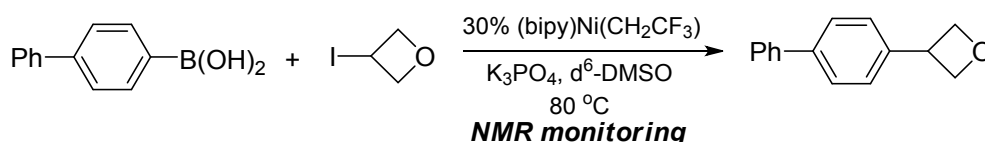

4-biphenylboronic acid (0.075 mmol, 1.5 equiv),  $\text{K}_3\text{PO}_4$  (0.10 mmol, 3.0 equiv), followed by a solution of 3-iodooxetane (0.05 mmol, 1.0 equiv) and  $\text{PhCF}_3$  (0.05 mmol, internal standard for  $^{19}\text{F}$  NMR) in the  $\text{d}^6\text{-DMSO}$  solvent (0.5 mL) were loaded into a 25 mL of Schlenck tube which was subject to evacuating/flushing with nitrogen gas three times. The precatalyst **2** (30.0 mol%) in the  $\text{d}^6\text{-DMSO}$  solvent (0.5 mL) was added dropwise into the reaction system subsequently (*increasing the catalyst loading for clear identification of the reaction initiation*). The Schlenck tube was screw capped and put into a preheated oil bath (80  $^\circ\text{C}$ ). After stirring for the indicated time, the reaction mixture was cooled to room temperature and recorded by  $^1\text{H}$  and  $^{19}\text{F}$  NMR. The result indicated the gradual consumption of 3-iodooxetane, the formation of product **9b** as well as the extrusion of  $\text{CH}_2=\text{CF}_2$  from precatalyst **2**.



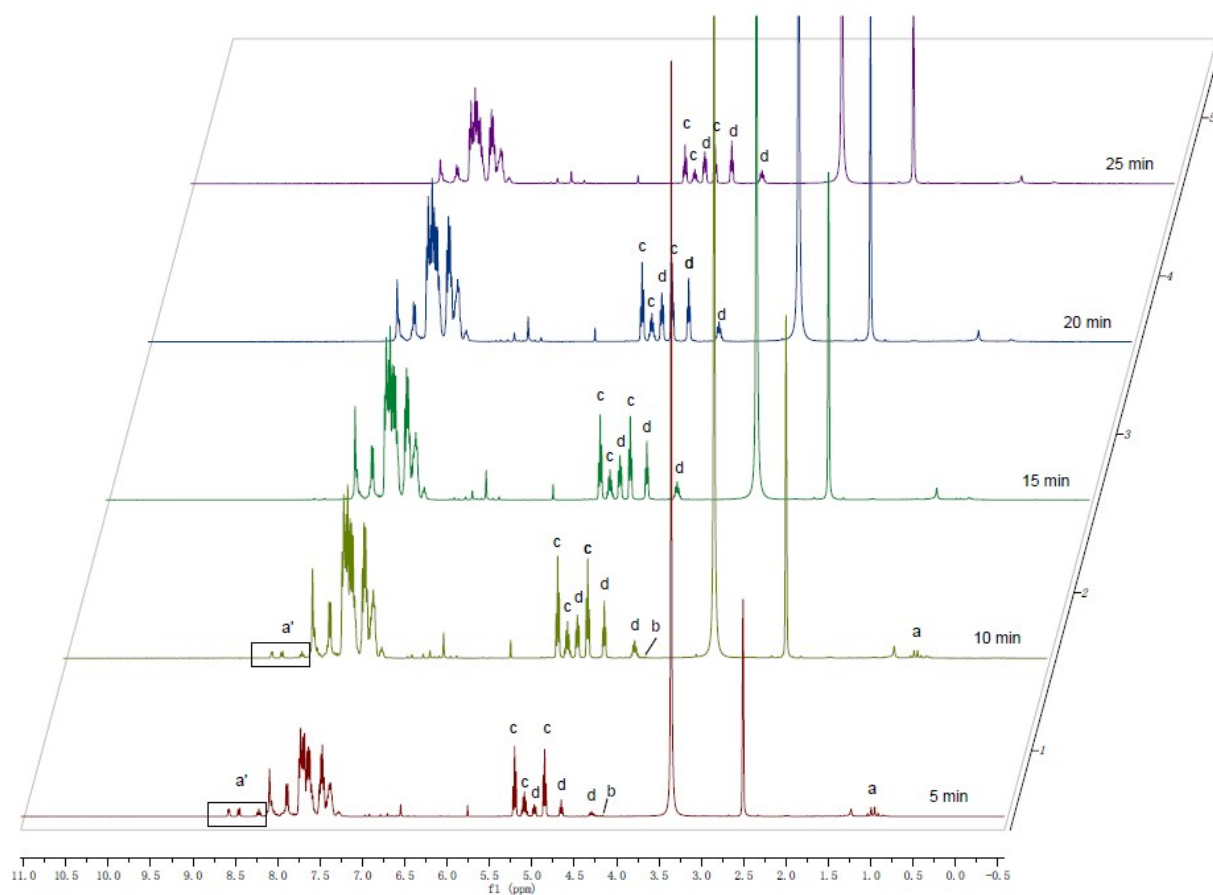

**Figure S124.  $^1\text{H}$  NMR monitoring of the synthetic reaction of product 14b**

<sup>a</sup>methylene peaks of precatalyst **2**; <sup>a'</sup>bipy peaks of precatalyst **2**; <sup>b</sup> $\text{CH}_2=\text{CF}_2$  gas peaks; <sup>c</sup>3-iodooxetane; <sup>d</sup>product **14b**

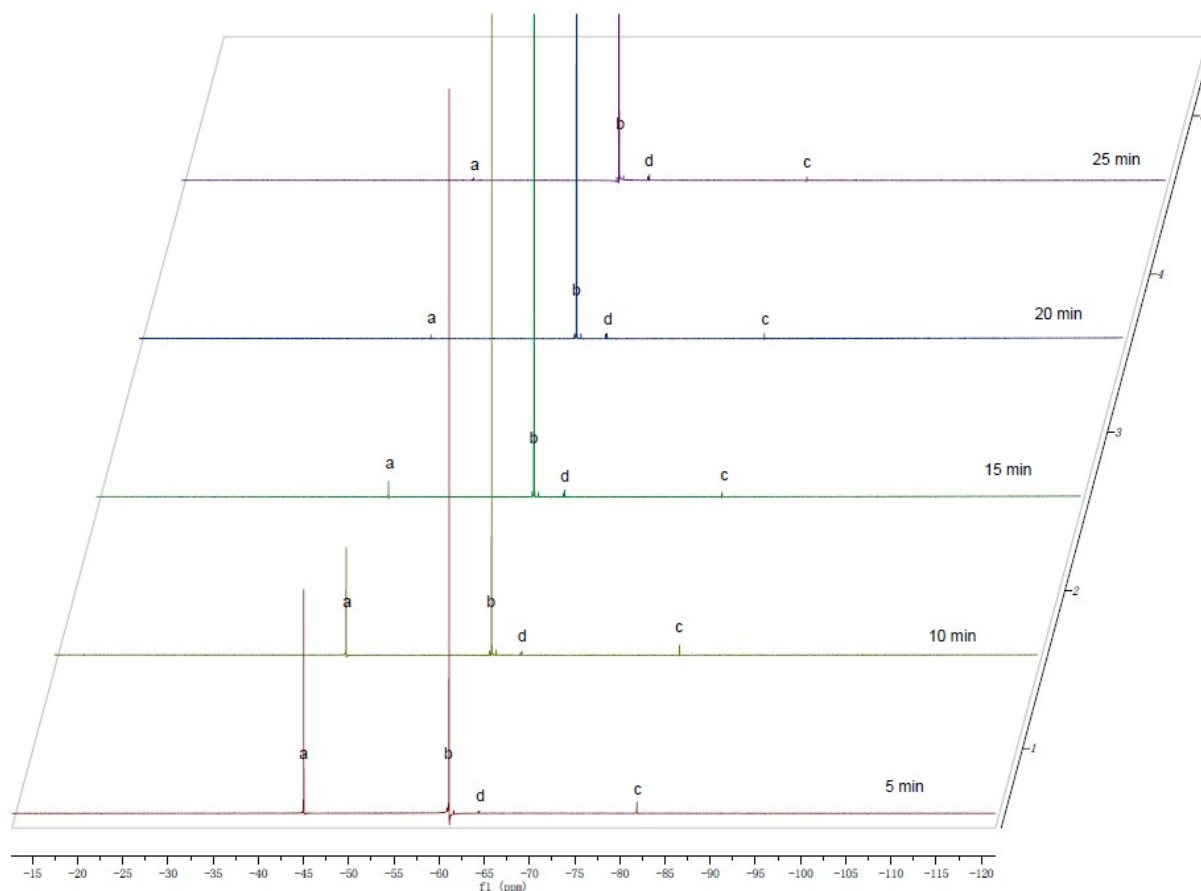

**Figure S125.  $^{19}\text{F}$  NMR monitoring of the synthetic reaction of product 14b**

<sup>a</sup>trifluoromethyl peak of precatalyst **2**; <sup>b</sup>trifluorotoluene (internal standard); <sup>c</sup> $\text{CH}_2=\text{CF}_2$  gas peaks; <sup>d</sup> $\text{Ar}-\text{CH}_2\text{CF}_3$  **7a** (produced from the retained  $\text{CF}_3\text{CH}_2$  group during the initiation step of catalytic cycle).

**(iii) GC-MS analysis for identifying the role of trifluoroethyl groups bound to nickel**

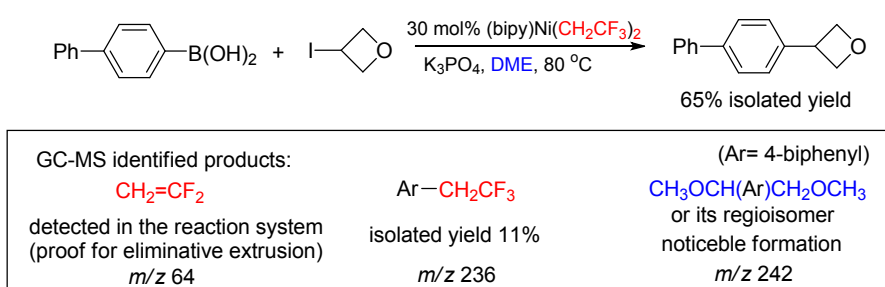

4-biphenylboronic acid (0.3 mmol, 1.5 equiv),  $\text{K}_3\text{PO}_4$  (0.6 mmol, 3.0 equiv), followed by a solution of 3-iodooxetane (0.2 mmol, 1.0 equiv) in the DME solvent (0.5 mL) were loaded into a 25 mL of Schlenk tube which was subject to evacuating/flushing with nitrogen gas three times. The precatalyst **2** (30.0 mol%) in the DME solvent (0.5 mL) was added dropwise into the reaction system subsequently (increasing the catalyst loading for clear identification of the reaction initiation). The Schlenk tube was screw capped and put into a preheated oil bath (80 °C). After stirring for 24 h, the reaction mixture was cooled to room

temperature and poured into a saturated aqueous ammonium chloride solution (10.0 mL). The aqueous phase was extracted with ether three times (10.0 mL  $\times$  3). The combined organic phase was analyzed by GC-MS with the *p*-xylene internal standard. The organic phase was condensed in *vacuo* to remove solvent, and the residue was purified by flash chromatography on preparative TLC to fingerprint the ArCH<sub>2</sub>CF<sub>3</sub> mark **7a** (11% yield) and obtain the desired product **14b** (65% yield).

**Table S5.** GC-MS analysis for probing roles of trifluoroethyl groups bound to nickel

| Retention time/minute | Detected species                                                                                         | Area%              |
|-----------------------|----------------------------------------------------------------------------------------------------------|--------------------|
| 1.62                  | F <sub>2</sub> C=CH <sub>2</sub>                                                                         | Trace <sup>a</sup> |
| 8.56                  | 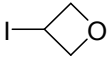                        | 3.30               |
| 12.98                 | Biphenyl                                                                                                 | 13.50              |
| 13.44                 | Bipyridine                                                                                               | 5.77               |
| 13.80                 |                         | 2.38               |
| 17.37                 | CH <sub>3</sub> OCH(Ar)CH <sub>2</sub> OCH <sub>3</sub>                                                  | 1.16               |
| 18.18                 | <br>(desired product) | 12.92              |

<sup>a</sup>F<sub>2</sub>C=CH<sub>2</sub> was detected in trace amount in GC-MS due to the volatility of its gaseous properties. It could be observed clearly in <sup>19</sup>F NMR (Figure S104).

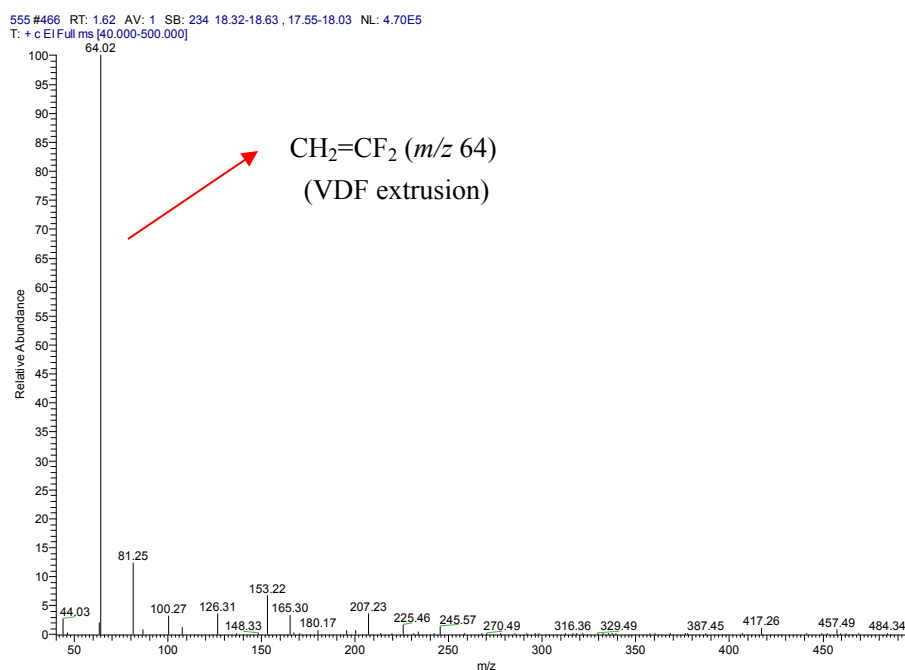

**Figure S126.** Detection of CH<sub>2</sub>=CF<sub>2</sub> by GC-MS

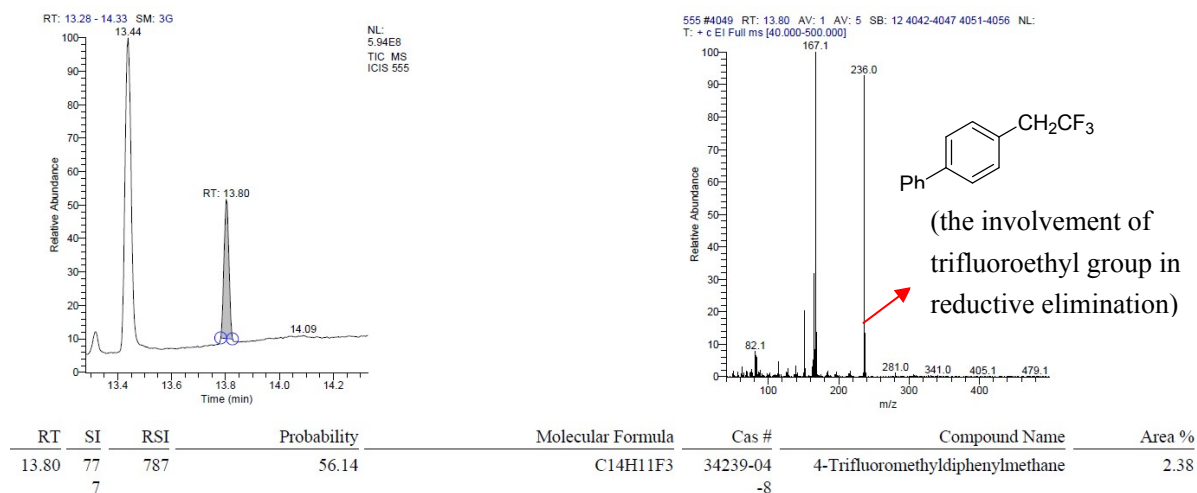

**Figure S127. Detection of the Ar-CH<sub>2</sub>CF<sub>3</sub> mark by GC-MS**

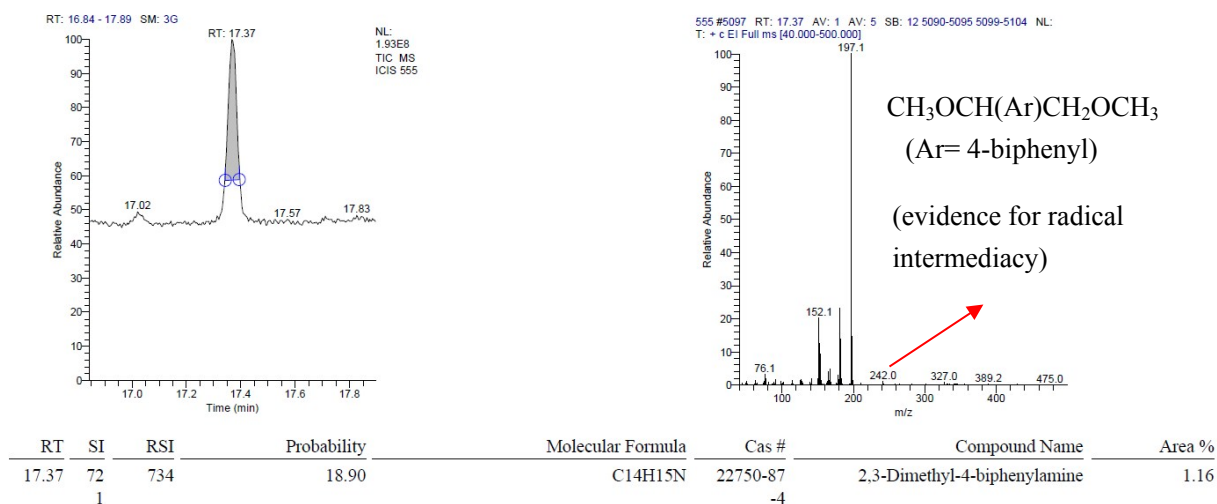

**Figure S128. Detection of CH<sub>3</sub>OCH(Ar)CH<sub>2</sub>OCH<sub>3</sub> by GC-MS**

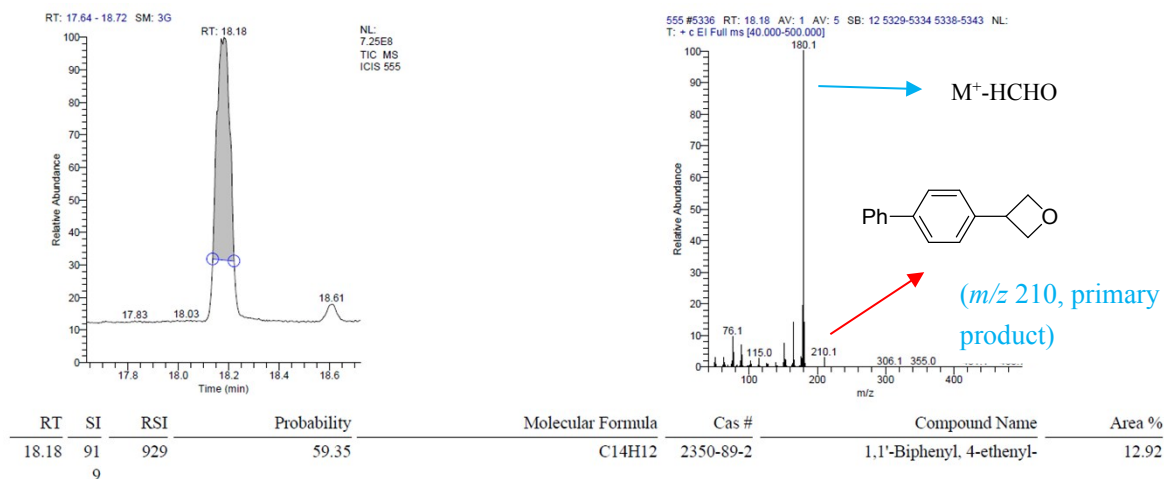

**Figure S129. Detection of the product 14b by GC-MS**

**(b) Evidences for solvent-caged radical reactions**

**i) Detection of  $\text{CF}_3\text{CH}_3$  ( $\text{CF}_3\text{CH}_2$  radical abstracts ethereal  $\alpha$ -hydrogen) and  $\text{CH}_3\text{OCH}(\text{Ar})\text{CH}_2\text{OCH}_3$  to support the DME solvent-caged reactions**

**Table S6. GC-MS analysis of the coupling between  $\text{CF}_3\text{CH}_2\text{I}$  and 4-biphenylboronic acid**

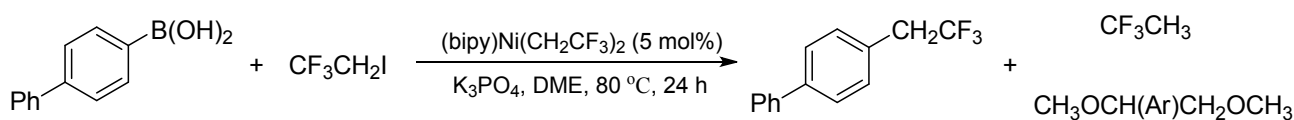

| Retention time/minute | Detected species                                          | Area%              |
|-----------------------|-----------------------------------------------------------|--------------------|
| 1.64                  | $\text{CF}_3\text{CH}_3$                                  | Trace <sup>a</sup> |
| 12.98                 | Ph-Ph                                                     | 8.42               |
| 13.44                 | Bipy                                                      | 5.02               |
| 13.81                 | <chem>c1ccc(cc1)CC(F)(F)F</chem>                          | 17.38              |
| 14.26                 | <chem>c1ccc(cc1)C(F)(F)F</chem>                           | 0.50               |
| 16.33                 | <chem>c1ccc(cc1)I</chem>                                  | 6.94               |
| 17.37                 | $\text{CH}_3\text{OCH}(\text{Ar})\text{CH}_2\text{OCH}_3$ | 9.79               |

<sup>a</sup> $\text{CF}_3\text{CH}_3$  was detected in trace amount in GC-MS due to the volatility of its gaseous properties.

# My Qual Report

Data File: 549\_180328113743 Original Data Path: D:\GCMS\DATA\2018\03\0328  
Scans: 7075 Low Mass(m/z): 40  
High Mass(m/z): 500

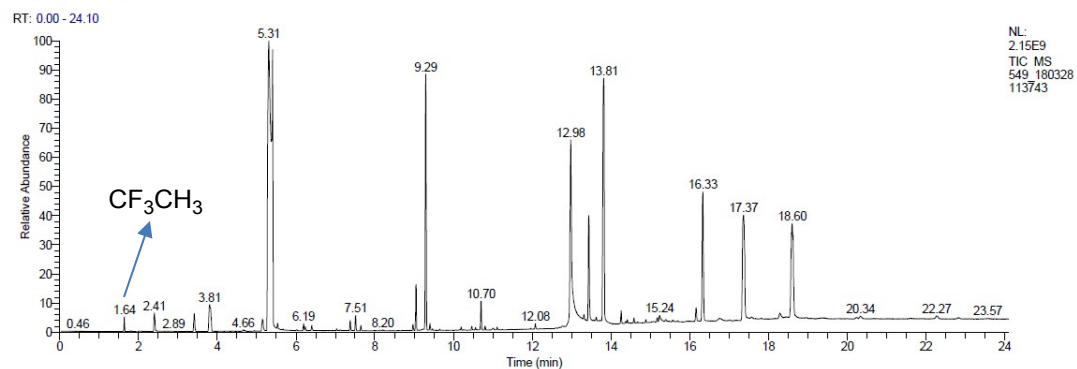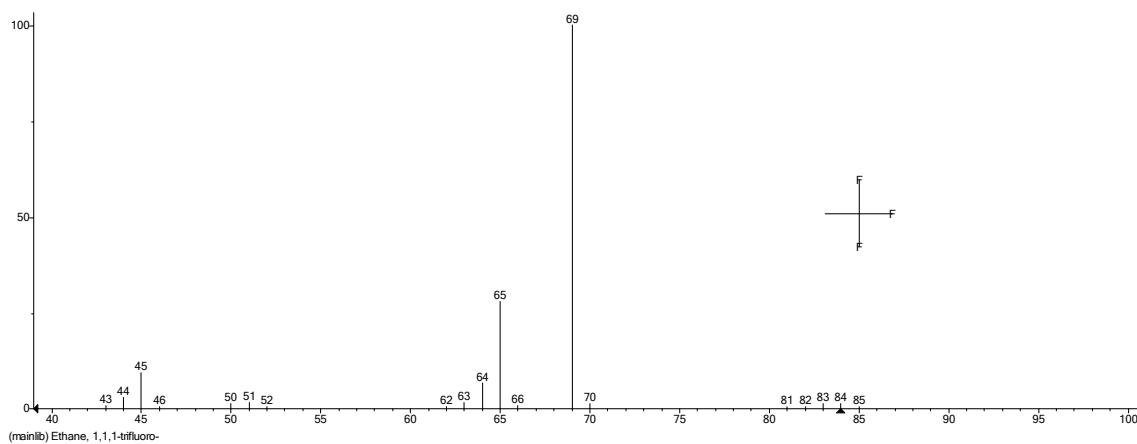

**Figure S130. Detection CF<sub>3</sub>CH<sub>3</sub> by GC-MS (CF<sub>3</sub>CH<sub>2</sub> radical abstracts ethereal  $\alpha$ -hydrogen)**

ii) Detection of EtOAc (EtOOCCH<sub>2</sub> radical abstracts ethereal  $\alpha$ -hydrogen) to support the DME solvent-caged reactions

Table S7. GC-MS analysis of the coupling between BrCH<sub>2</sub>CO<sub>2</sub>Et and 4-biphenylboronic acid

| Retention time/minute | Detected species      | Area% |
|-----------------------|-----------------------|-------|
| 4.65                  | CH <sub>3</sub> COOEt | 1.76  |
| 10.55                 |                       | 6.36  |
| 13.22                 |                       | 0.41  |
| 14.83                 |                       | 11.78 |

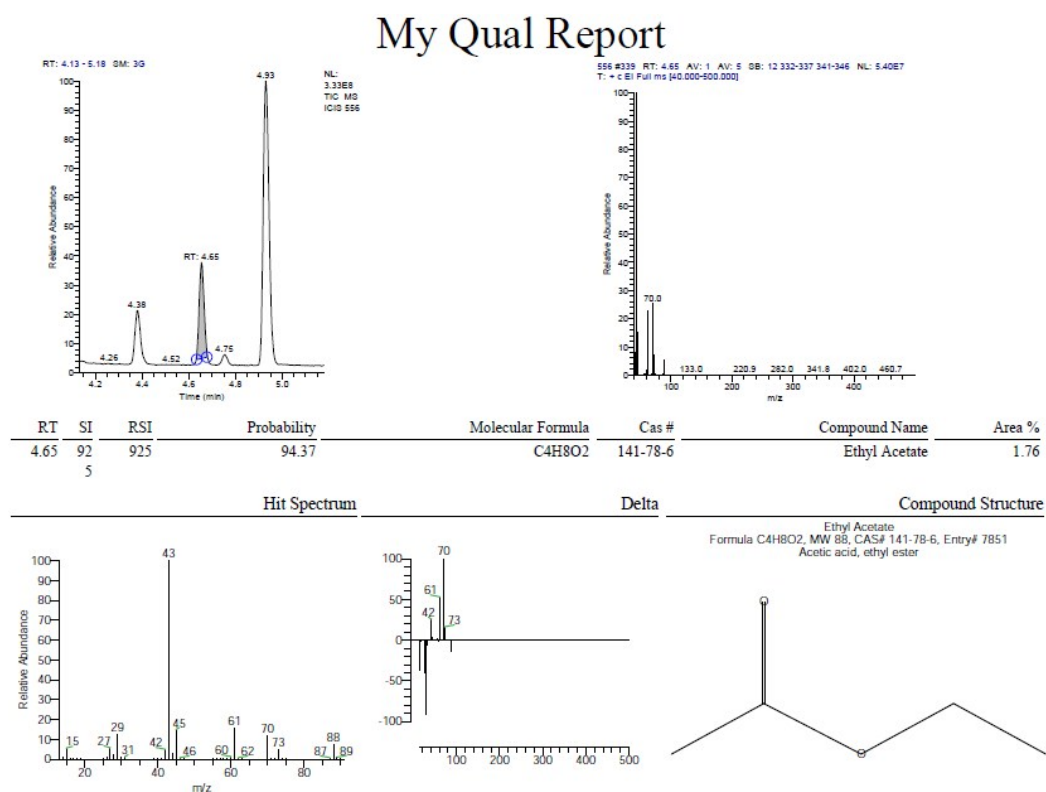

Figure S131. Detection of EtOAc by GC-MS (EtOOCCH<sub>2</sub> radical abstracts ethereal  $\alpha$ -hydrogen)

### (c) TEMPO radical trapping experiments

**Example 1:** 4-biphenylboronic acid (0.3 mmol, 1.5 equiv),  $K_3PO_4$  (0.4 mmol, 2.0 equiv), TEMPO (0.2 mmol, 1.0 equiv), followed by a solution of 3-iodooxetane (0.2 mmol, 1.0 equiv) in the DME solvent (0.5 mL) were loaded into a 25 mL of Schlenck tube which was subject to evacuating/flushing with nitrogen gas three times. The precatalyst **2** (10.0 mol%) in the DME solvent (0.5 mL) was added dropwise into the reaction system subsequently.

**Table S8.** GC-MS analysis of TEMPO radical trapping for the coupling reaction of 4-biphenylboronic acid and 3-iodooxetane

#### a Radical inhibition test

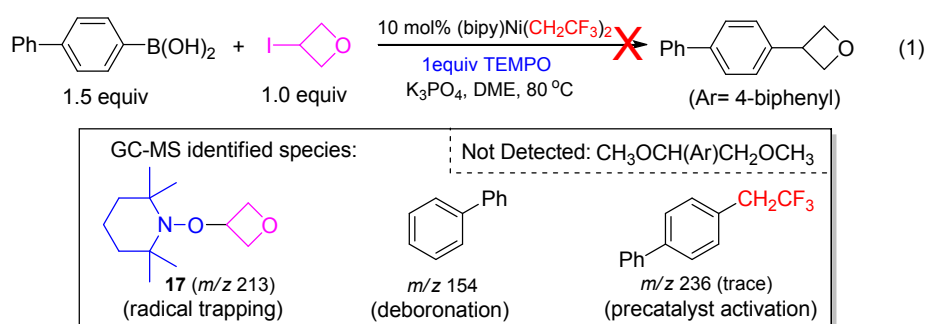

| Retention time/minute | Detected species                    | Area%              |
|-----------------------|-------------------------------------|--------------------|
| 8.29                  | <i>p</i> -xylene(internal standard) | 14.84              |
| 8.55                  | 3-iodooxetane                       | 7.20               |
| 9.00                  |                                     | 0.42               |
| 10.28                 |                                     | trace <sup>a</sup> |
| 10.96                 | TEMPO                               | 12.10              |
| 12.96                 | Biphenyl                            | 16.67              |
| 13.79                 |                                     | 0.07               |

<sup>a</sup>This species was detected in trace amount possibly due to its instability.



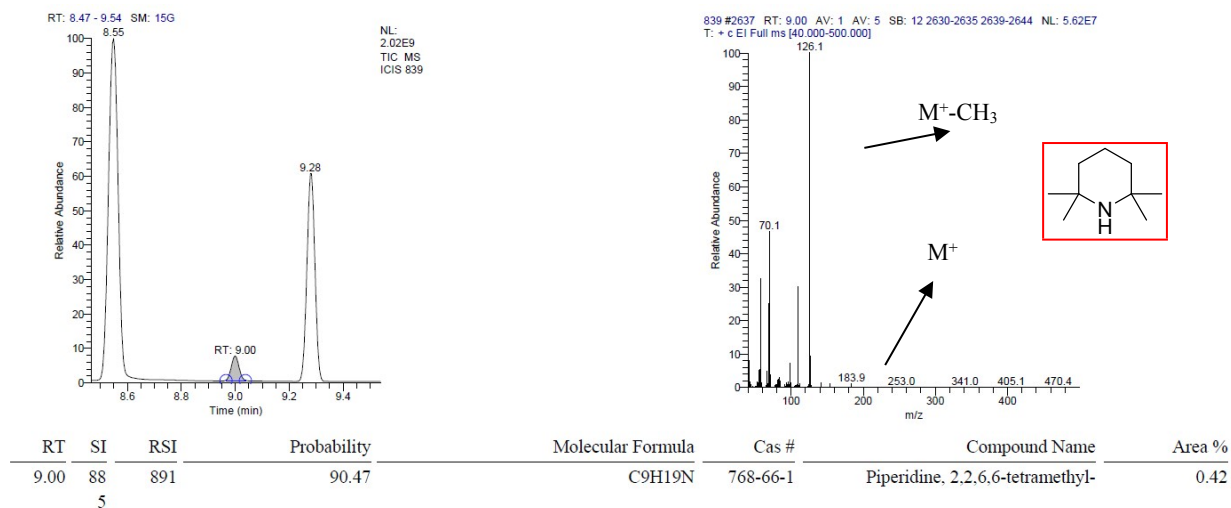

**Figure S132. Detection of 2,2,6,6-tetramethylpiperidine by GC-MS**

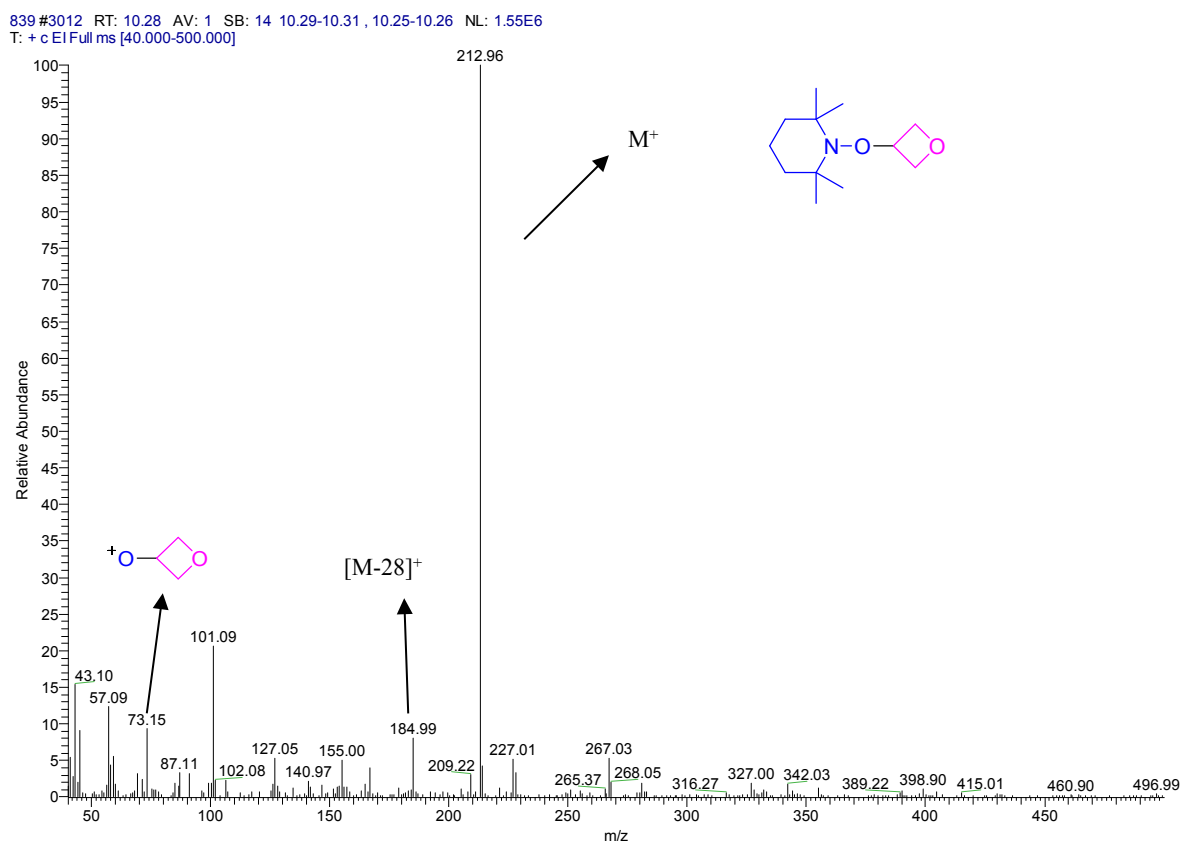

**Figure S133. Detection of 2,2,6,6-tetramethyl-1-(oxetan-3-yloxy)piperidine by GC-MS**

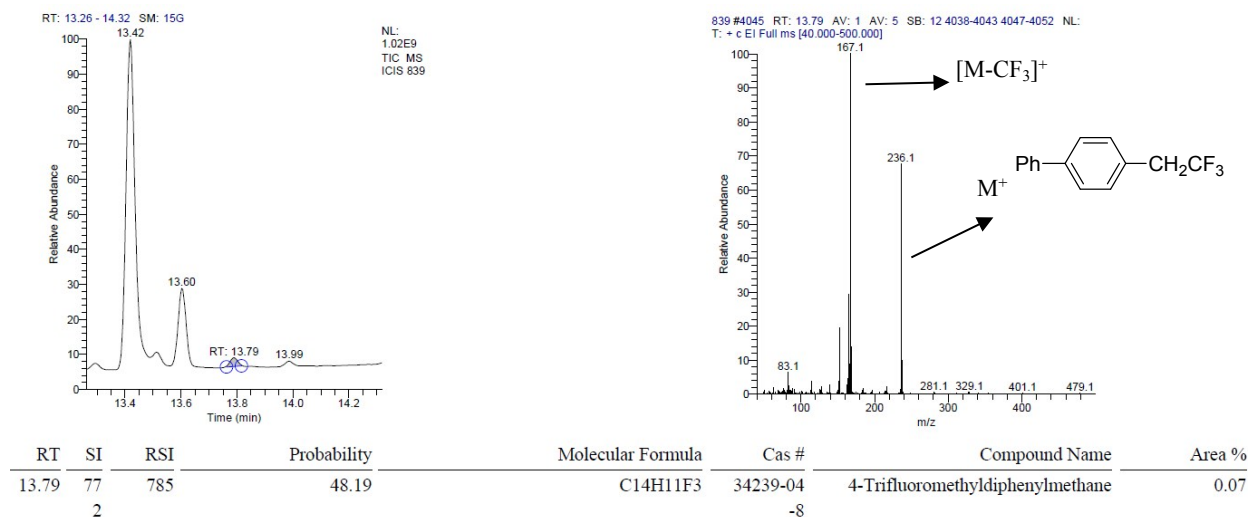

**Figure S134. Detection of Ar-CH<sub>2</sub>CF<sub>3</sub> by GC-MS (Ar= 4-biphenyl)**

**Example 2:** 4-biphenylboronic acid (0.3 mmol, 1.5 equiv), K<sub>3</sub>PO<sub>4</sub> (0.6 mmol, 3.0 equiv), TEMPO (0.2 mmol, 1.0 equiv), followed by a solution of CF<sub>3</sub>CH<sub>2</sub>I (0.2 mmol, 1.0 equiv) in the DMSO solvent (0.5 mL) were loaded into a 25 mL of Schlenk tube which was subject to evacuating/flushing with nitrogen gas three times. The precatalyst **2** (10.0 mol%) in the DMSO solvent (0.5 mL) was added dropwise into the reaction system subsequently. The Schlenk tube was screw capped and put into a preheated oil bath (80 °C). After stirring for 24 h, the reaction mixture was cooled to room temperature and poured into a saturated aqueous ammonium chloride solution (10.0 mL). The aqueous phase was extracted with ether three times (10.0 mL × 3). The combined organic phase was analyzed by GC-MS with the *p*-xylene internal standard.

**Table S9.** GC-MS analysis of TEMPO radical trapping for the coupling reaction of 4-biphenylboronic acid and CF<sub>3</sub>CH<sub>2</sub>I

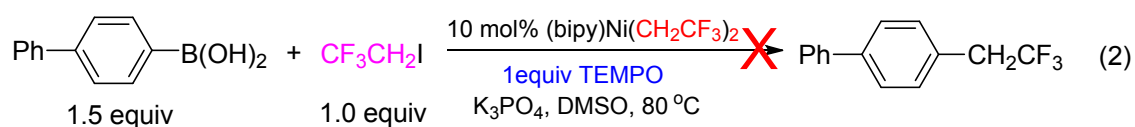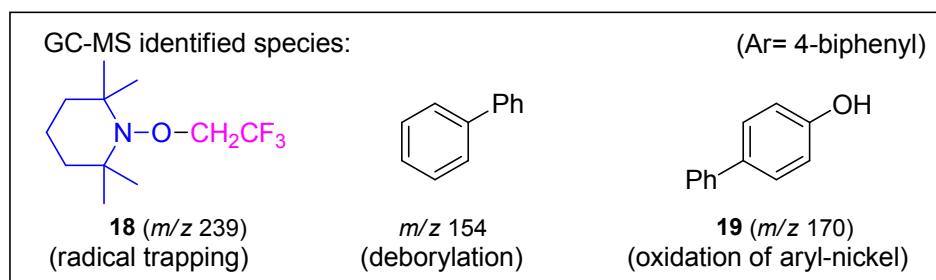

| Retention time/minute | Detected species                        | Area% |
|-----------------------|-----------------------------------------|-------|
| 3.79                  | CF <sub>3</sub> CH <sub>2</sub> I       | 10.92 |
| 8.31                  | <i>p</i> -xylene<br>(internal standard) | 20.27 |
| 10.41                 |                                         | 3.82  |
| 10.98                 | TEMPO                                   | 21.93 |
| 12.98                 | Biphenyl                                | 15.14 |
| 13.45                 | Bipyridine                              | 0.90  |
| 15.24                 |                                         | 1.51  |

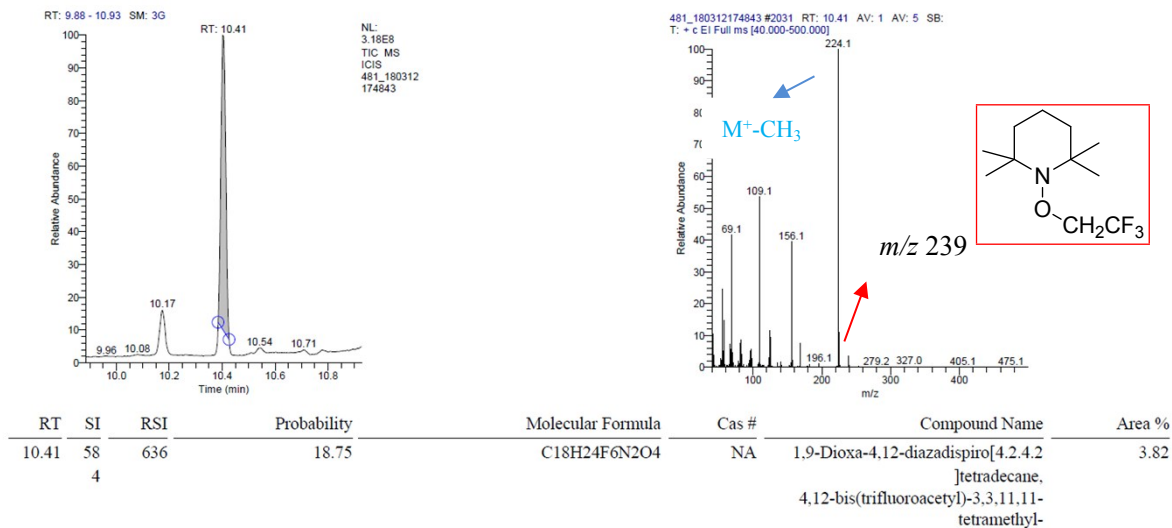

**Figure S135. Detection of TEMPO-CH<sub>2</sub>CF<sub>3</sub> by GC-MS**

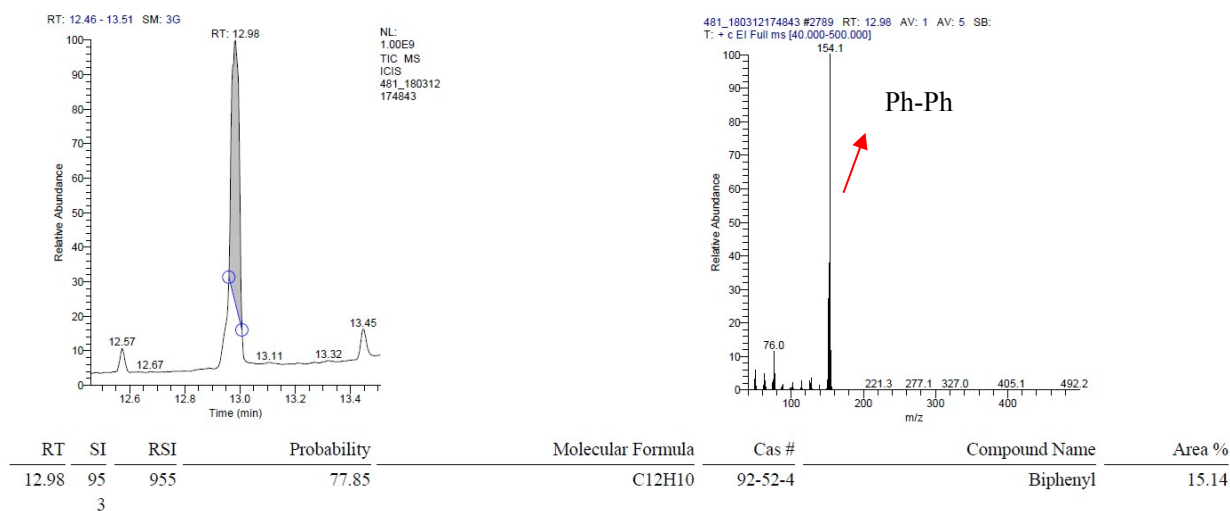

**Figure S136. Detection of biphenyl by GC-MS**

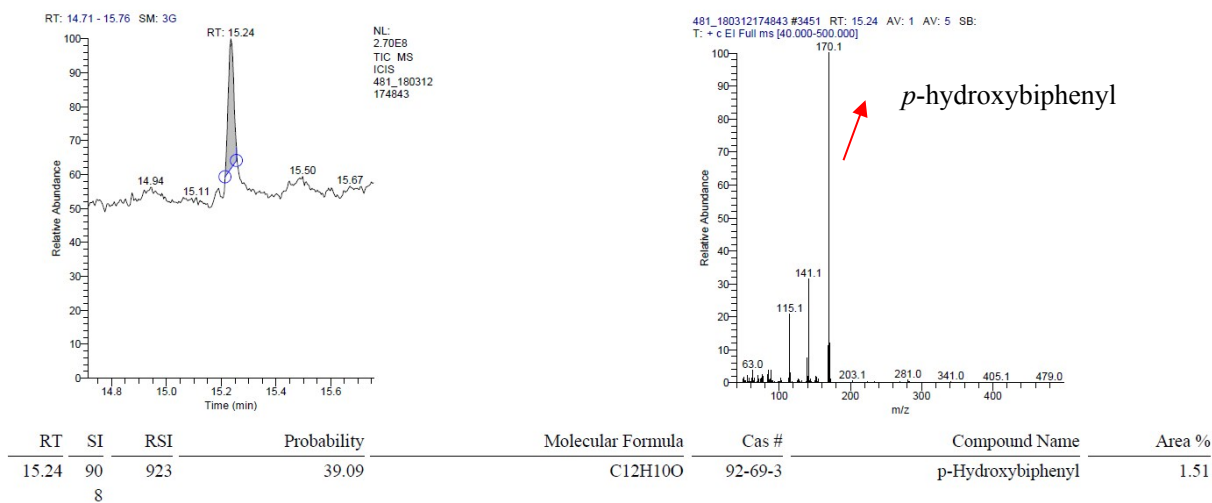

**Figure S137. Detection of p-hydroxybiphenyl by GC-MS**

### (c) Radical clock experiment

4-biphenylboronic acid (0.3 mmol, 1.5 equiv), K<sub>3</sub>PO<sub>4</sub> (0.6 mmol, 3.0 equiv), followed by a solution of CF<sub>3</sub>CH<sub>2</sub>I (0.2 mmol, 1.0 equiv) and (1-cyclopropylvinyl)benzene (0.2 mmol, 1.0 equiv) in the DMSO solvent (0.5 mL) were loaded into a 25 mL of Schlenk tube which was subject to evacuating/flushing with nitrogen gas three times. The precatalyst **2** (10.0 mol%) in the DMSO solvent (0.5 mL) was added dropwise into the reaction system subsequently. The Schlenk tube was screw capped and put into a preheated oil bath (80 °C). After stirring for 24 h, the reaction mixture was cooled to room temperature and poured into a saturated aqueous ammonium chloride solution (10.0 mL). The aqueous phase was extracted with ether three times (10.0 mL × 3). The combined organic phase was analyzed by GC-MS with the *p*-xylene internal standard.

**Table S10.** GC-MS result of radical clock experiment

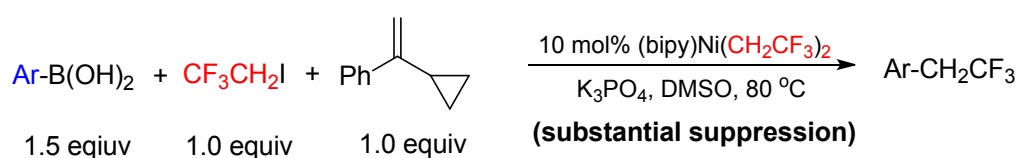

| GC-MS identified species:                                                           |                                                                                     | (Ar= 4-biphenyl)                                                            |
|-------------------------------------------------------------------------------------|-------------------------------------------------------------------------------------|-----------------------------------------------------------------------------|
| 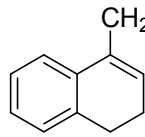 |  | biphenyl ( <i>m/z</i> 154)<br>(deborylation)                                |
| <b>20</b> ( <i>m/z</i> 226)<br>(trifluoroethyl trapping)                            | <b>21</b> ( <i>m/z</i> 296)<br>(insertion of aryl-nickel)                           | 4-hydroxybiphenyl <b>19</b><br><i>m/z</i> 170<br>(oxidation of aryl-nickel) |

| Retention time/minute | Detected species                                                                                    | Area% |
|-----------------------|-----------------------------------------------------------------------------------------------------|-------|
| 3.80                  | CF <sub>3</sub> CH <sub>2</sub> I                                                                   | 7.71  |
| 8.31                  | <i>p</i> -xylene (internal standard)                                                                | 16.15 |
| 11.51                 | 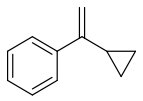                 | 12.59 |
| 11.68                 |                  | 0.49  |
| 12.10                 | <br>(its isomer) | 0.80  |

|       |                                                                                                   |       |
|-------|---------------------------------------------------------------------------------------------------|-------|
| 12.35 | 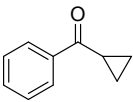                 | 1.69  |
| 12.89 | <br>(its isomer) | 2.17  |
| 12.98 | Biphenyl                                                                                          | 11.35 |
| 13.80 |                  | 1.71  |
| 14.26 |                  | 0.44  |
| 15.23 |                  | 1.46  |
| 15.57 |                  | 0.49  |
| 16.19 | <br>(its isomer) | 0.85  |

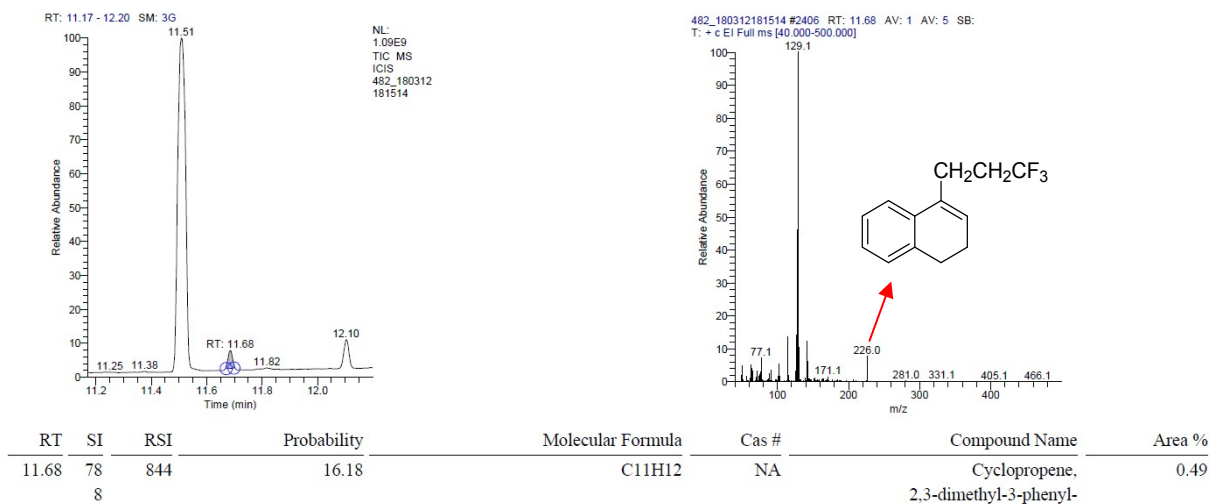

**Figure S138. Detection of trapping of  $\text{CF}_3\text{CH}_2$  radical by radical-clock**

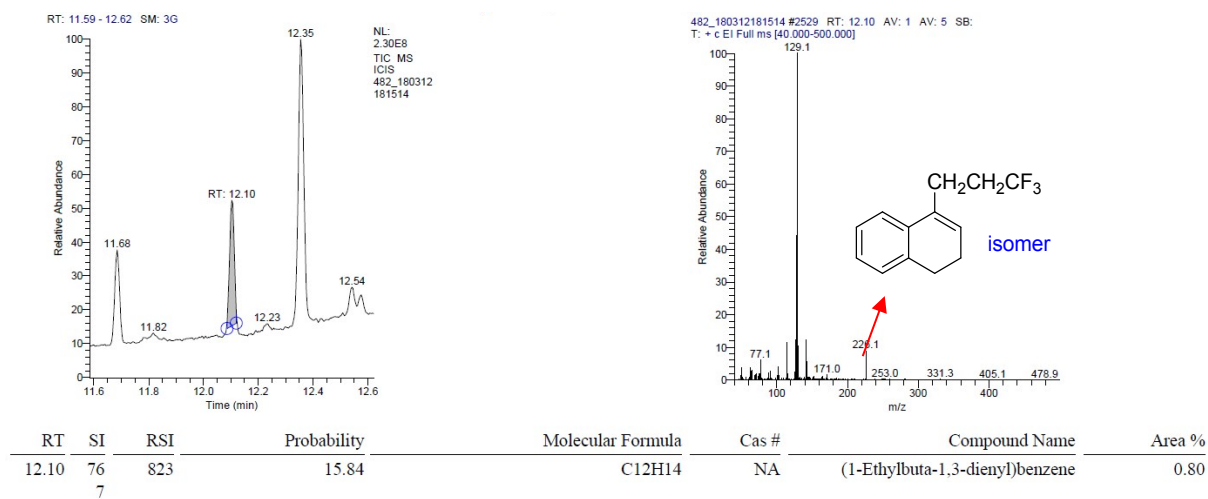

**Figure S139. Detection of trapping of  $\text{CF}_3\text{CH}_2$  radical by radical-clock (an isomeric product)**

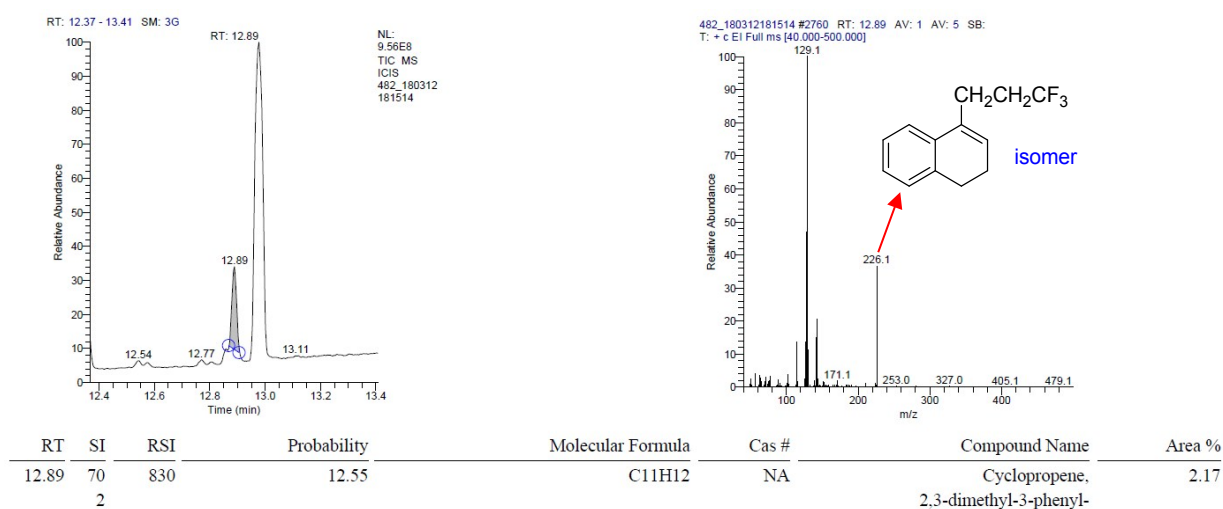

**Figure S140. Detection of trapping of  $\text{CF}_3\text{CH}_2$  radical by radical-clock (another isomer)**

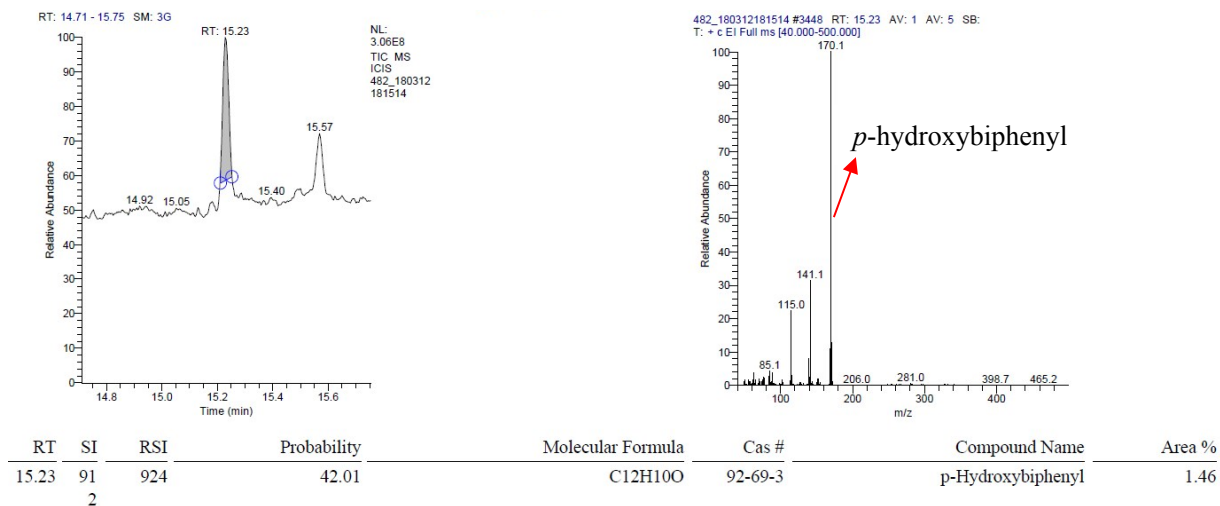

**Figure S141. Detection of *p*-hydroxybiphenyl in radical-clock experiment**

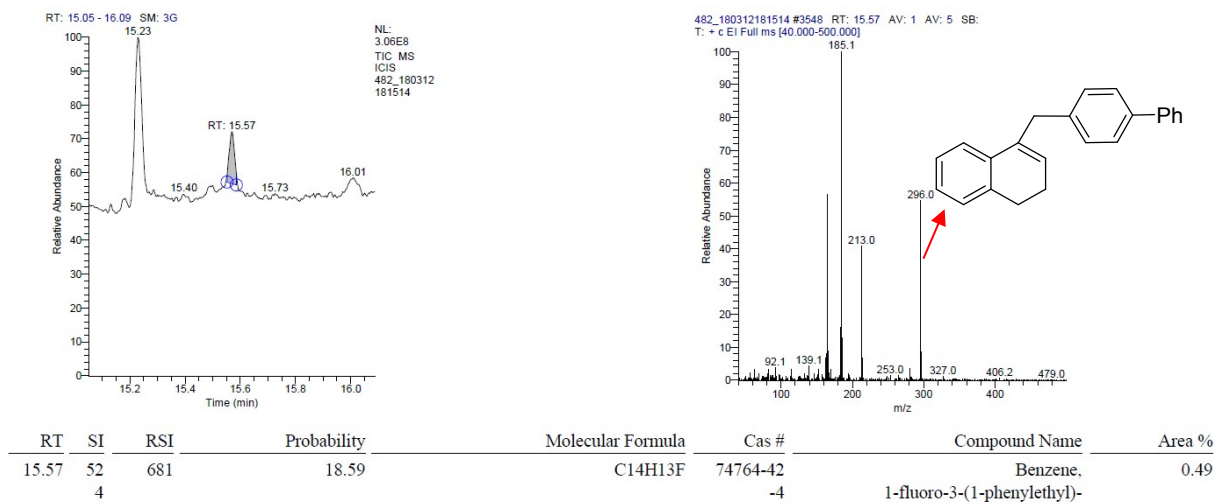

**Figure S142. Detection of trapping of Aryl moiety by radical-clock**



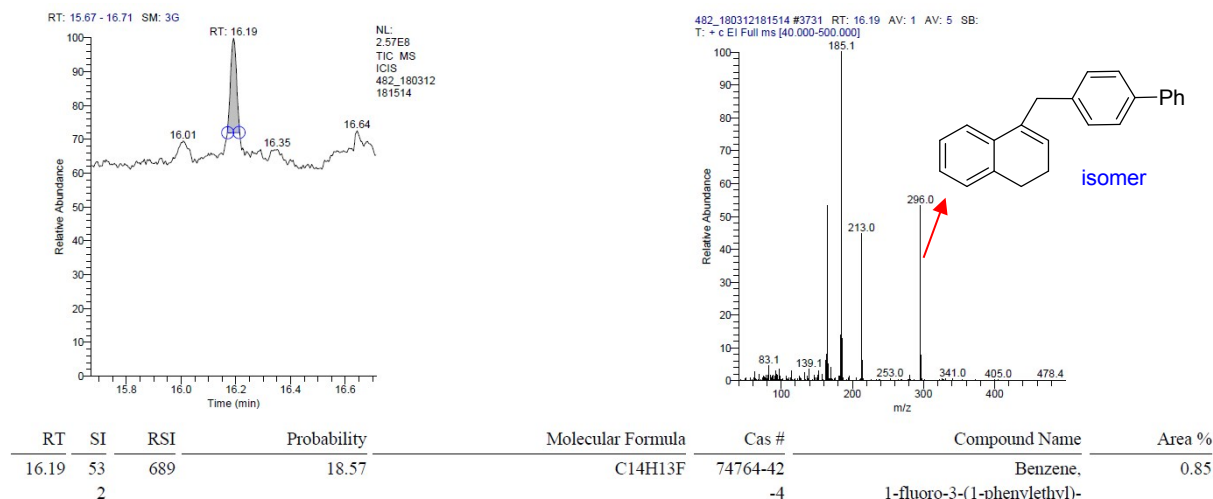

**Figure S143. Detection of trapping of Aryl moiety by radical-clock (an isomeric product)**

**(d) Questioning over Ni(0)/Ni(II) or Ni(I)/Ni(III) catalytic cycle**

**i) Stoichiometric reaction of 4-biphenylboronic acid and 2 for verifying Ni(0)/Ni(II) cycle**

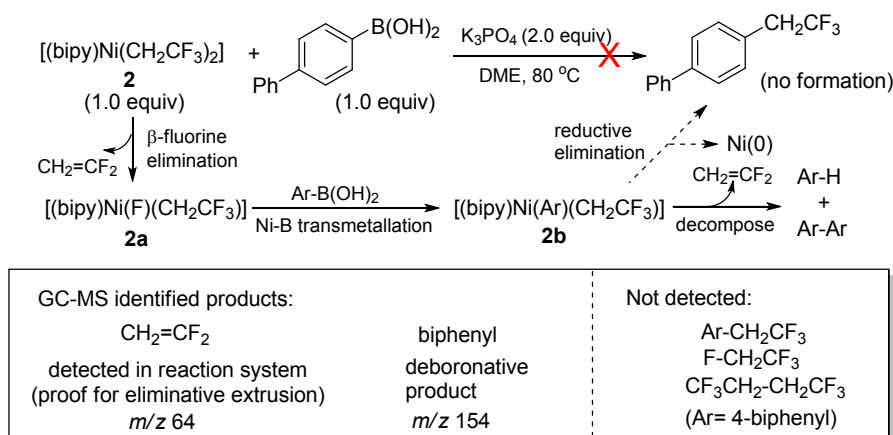

4-biphenylboronic acid (0.2 mmol, 1.0 equiv), K<sub>3</sub>PO<sub>4</sub> (0.4 mmol, 2.0 equiv), followed by a solution of precatalyst **2** (0.2 mmol, 1.0 equiv) in the DME solvent (1 mL) were loaded into a 25 mL of Schlenk tube which was subject to evacuating/flushing with nitrogen gas three times. The Schlenk tube was screw capped and put into a preheated oil bath (80 °C). After stirring for 24 h, the reaction mixture was filtrated through a PTFE filter and analyzed by GC-MS.

**Table S11. GC-MS analysis for probing the catalytic cycle of Ni(0)/Ni(II)**

| Retention Time/minute | Detected species                                  | Area%              |
|-----------------------|---------------------------------------------------|--------------------|
| 1.64                  | CF <sub>2</sub> =CF <sub>2</sub> ( <i>m/z</i> 64) | 0.03% <sup>a</sup> |
| 12.91                 | Biphenyl ( <i>m/z</i> 154)                        | 37.39%             |

<sup>a</sup>F<sub>2</sub>C=CH<sub>2</sub> was detected in trace amount in GC-MS due to the volatility of its gaseous properties.

| RT   | SI | RSI | Probability | Molecular Formula | Cas #     | Compound Name | Area % |
|------|----|-----|-------------|-------------------|-----------|---------------|--------|
| 1.60 | 51 | 999 | 50.16       | Ar                | 7440-37-1 | Argon         | 0.04   |
|      | 1  |     |             |                   |           |               |        |

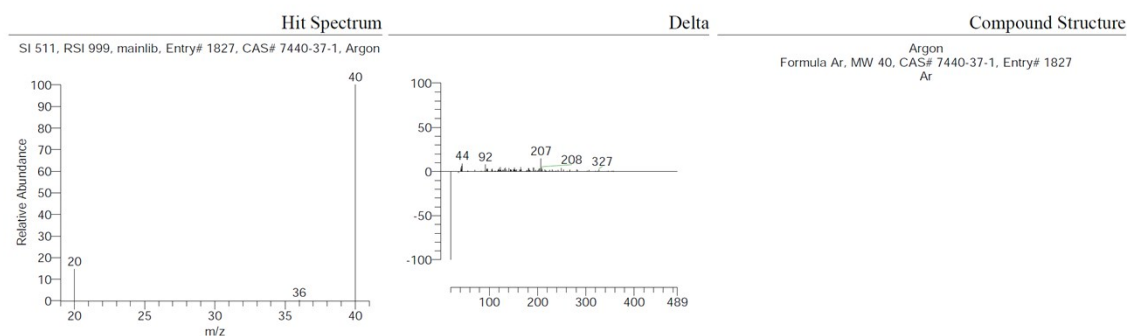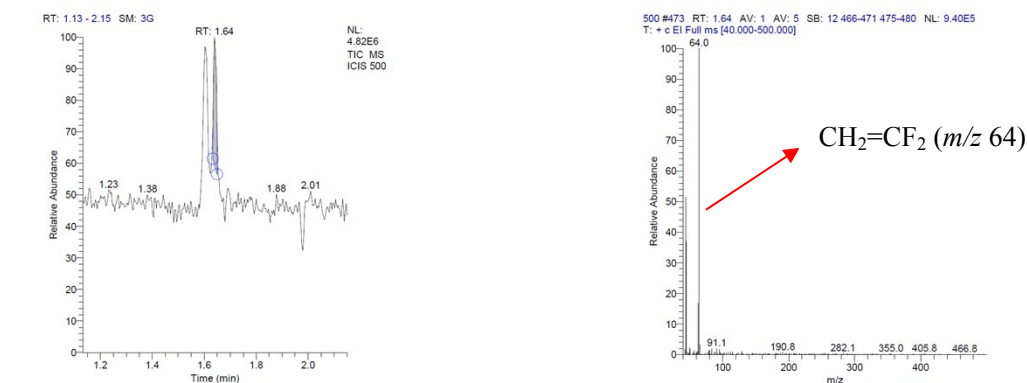

| RT   | SI | RSI | Probability | Molecular Formula | Cas #   | Compound Name         | Area % |
|------|----|-----|-------------|-------------------|---------|-----------------------|--------|
| 1.64 | 76 | 899 | 90.09       | C2H2F2            | 75-38-7 | Ethene, 1,1-difluoro- | 0.03   |
|      | 2  |     |             |                   |         |                       |        |

Figure S144. Detection of CH<sub>2</sub>=CF<sub>2</sub> by GC-MS

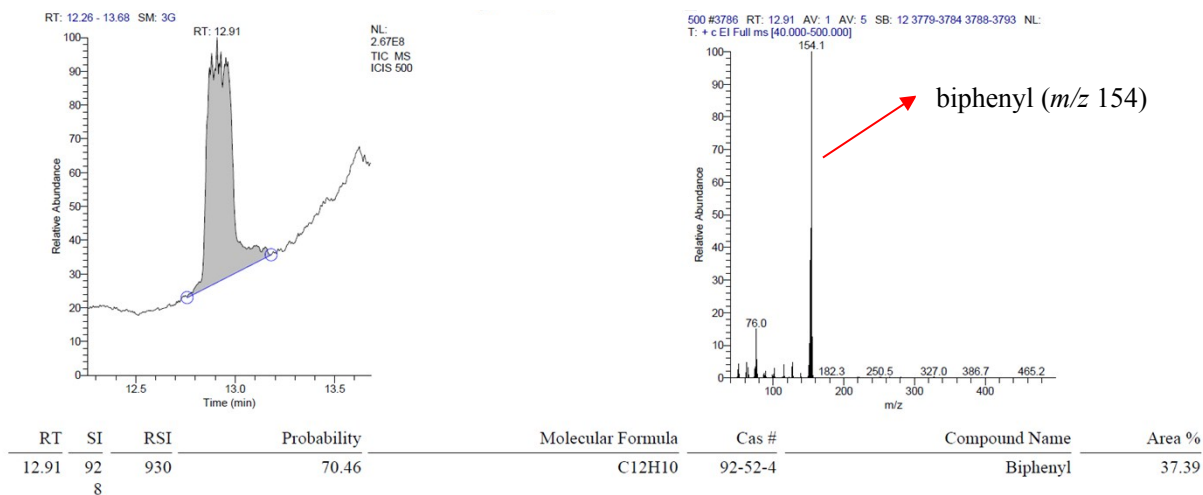

Figure S145. Detection of debornative product biphenyl by GC-MS

## ii) Coupling reaction under the catalysis of Ni(I) precatalyst for verifying Ni(I)/Ni(III) cycle

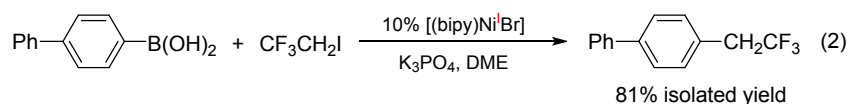

4-biphenylboronic acid (0.3 mmol, 1.5 equiv), K<sub>3</sub>PO<sub>4</sub> (0.6 mmol, 3.0 equiv), followed by a solution of CF<sub>3</sub>CH<sub>2</sub>I (0.2 mmol, 1.0 equiv) in the DME solvent (0.5 mL) were loaded into a 25 mL of Schlenck tube which was subject to evacuating/flushing with nitrogen gas three times. The presumed catalyst (bipy)Ni<sup>I</sup>Br (0.02 mmol, 1.0 equiv) was added into the reaction system subsequently. The Schlenck tube was screw capped and put into a preheated oil bath (80 °C). After stirring for 24 h, the reaction mixture was cooled to room temperature and poured into a saturated aqueous ammonium chloride solution (10.0 mL). The aqueous phase was extracted with ether three times (10.0 mL×3). After removing the solvent in vacuo, the residue was purified by flash chromatography on silica gel to afford the corresponding ArCH<sub>2</sub>CF<sub>3</sub> product (38 mg, isolated yield 81%).

## iii) Procedure for the preparation of [(bipy)Ni<sup>I</sup>Br]

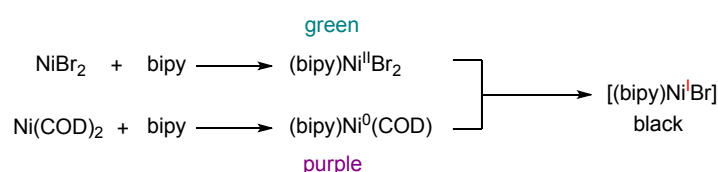

Analogous to the preparation method of (dppf)Ni<sup>(I)</sup>Cl of Hazari group (Guard, L. M.; Mohadjer Beromi, M.; Brudvig, G. W.; Hazari, N.; Vinyard, D. J. *Angew. Chem. Int. Ed.* **2015**, *54*, 13352.), the presumed catalyst [(bipy)Ni<sup>I</sup>Br] was prepared according to the following procedure. To a THF solution (5.0 mL) of bipyridine (0.5 mmol) was added nickel(II) bromide (0.5 mmol) and the reaction mixture was stirred at room temperature for 24 h. The reaction mixture exhibited a suspended solution of green color. Meanwhile, a reaction mixture of Ni(COD)<sub>2</sub> (0.5 mmol) and bipyridine (0.5 mmol) in the solution of THF was also stirred at room temperature for 24 h to accomplish the coordination step (a purple solution was formed). The two reaction solutions were combined together and stirred at room temperature for an extra 24 h. A dark black precipitate was produced in the combined reaction solution and was filtrated. The black solid was washed with ether (10.0 mL) and pentane (10.0 mL), and dried in *vacuo* to furnish the presumed [(bipy)Ni<sup>I</sup>Br] as a dark black powder (271 mg, Estimated Yield 92%). The insolubility of presumed catalyst [(bipy)Ni<sup>I</sup>Br] in organic solvent made NMR characterization failed. Thus, XPS (X-ray Photoelectron Spectroscopy) and IR were used to characterize the presumable [(bipy)Ni<sup>I</sup>Br]. The XPS of [(bipy)Ni<sup>I</sup>Br] illustrated

the peaks corresponding to Ni(I) at 855.486 eV which was negatively shifted by 0.214 eV in comparison with a known  $K_2[Ni^{(I)}(CN)_3]$  ( $Ni^{(I)}$  at 855.70 eV) (Figure S123). The IR spectra of  $[(bipy)Ni^I Br]$  (KBr pellets method) showed strong absorption bands in the ranges of 1599-1441  $cm^{-1}$  for the stretching mode of pyridine ring, which were blue shifted toward higher frequency as compared to the free bipyridine.

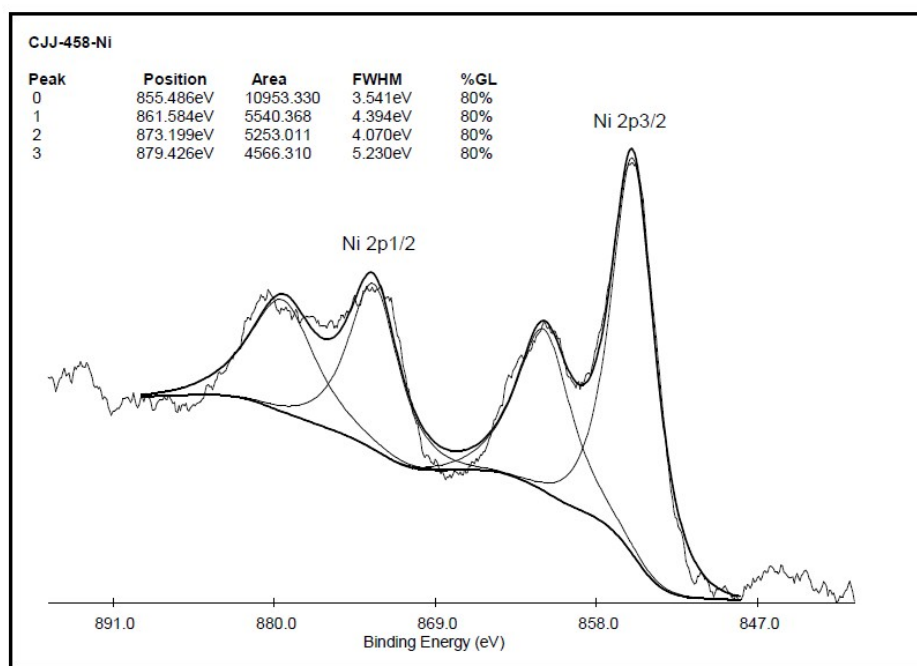

**Figure S146.** XPS (X-ray Photoelectron Spectroscopy) analysis of  $[(bipy)Ni^I Br]$

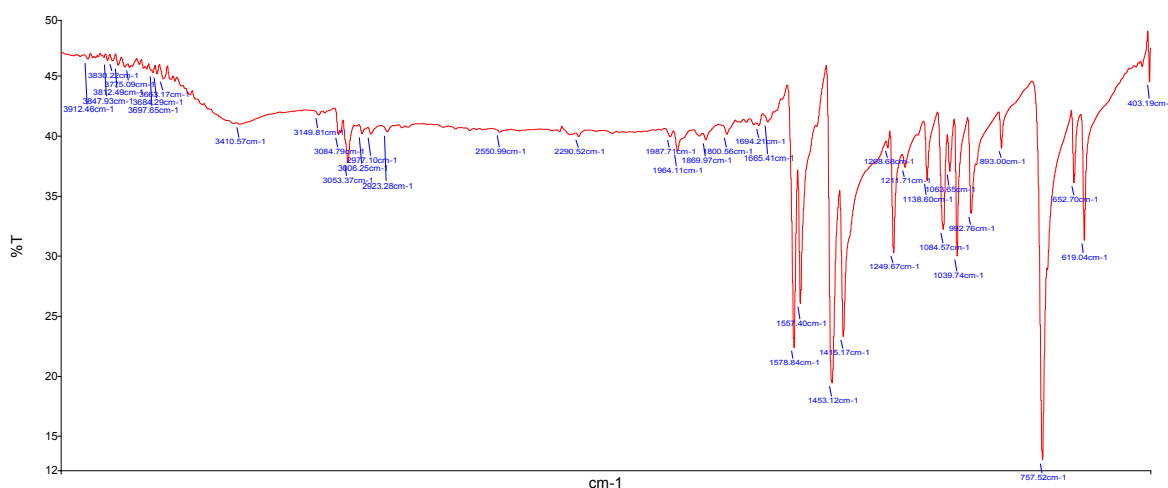

**Figure S147.** IR spectra of 2,2'-bipyridine

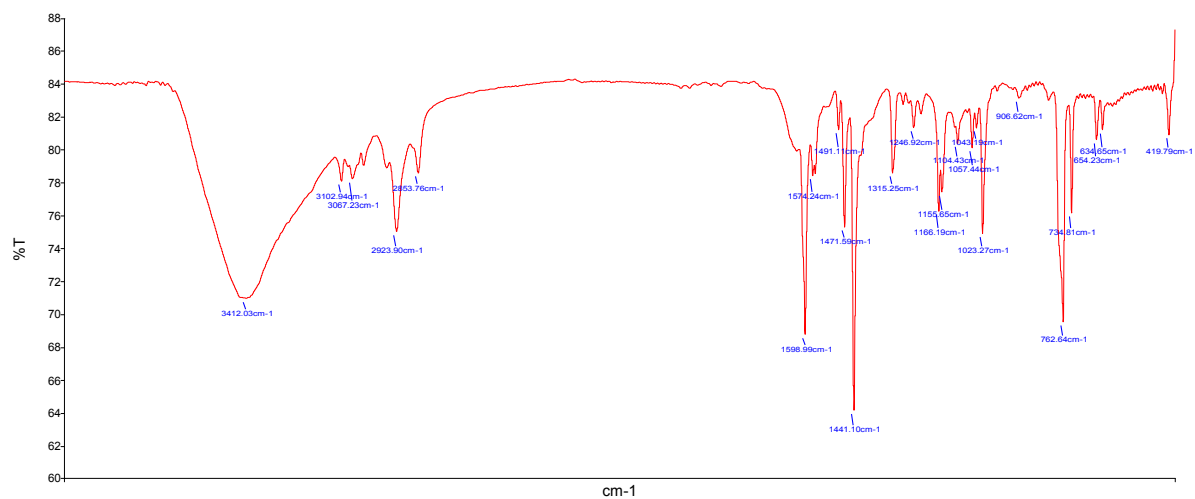

**Figure S148.** IR spectra of  $[(bipy)Ni]Br$
